# Supplementary material for: Screening tool to identify adolescents living with HIV in a community setting in Zimbabwe: A validation study
Source: PLoS One. 2018 Oct 2;13(10):e0204891. doi: 10.1371/journal.pone.0204891 (PMC6168137; doi:10.1371/journal.pone.0204891)
Supplement: S1 Dataset — (XLSX) [file pone.0204891.s001.xlsx]

## Sheet: Data
id	Age	Gender	mother_alive	father_alive	gradeform	Healthstatus	TB	Hospadmit	Skinprob	Cluster	previous_test	omt_res
1	16	Male	alive, another HH	dead	form 1	Good	No	No	Yes	1	Not indicated	negative
2	17	Male	alive, other area	dead	form 3	Good	No	No	No	1	Not indicated	negative
3	17	Female	alive, living in this HH	alive, living in this HH	form 3	Excellent	No	No	No	1	Not indicated	negative
4	17	Male	alive, living in this HH	alive, living in this HH	form 4	Excellent	No	Yes	No	1	Not indicated	negative
7	14	Female	dead	dead	form 1	Excellent	No	No	Yes	1	Not indicated	negative
8	8	Male	dead	dead	grade 1	Good	No	No	No	1	Not indicated	negative
9	13	Female	alive, another HH	alive, living in this HH	grade 6	Excellent	No	No	No	1	Not indicated	negative
10	13	Male	alive, living in this HH	alive, living in this HH	grade 7	Excellent	No	Yes	No	1	Negative	negative
11	11	Female	alive, living in this HH	alive, living in this HH	grade 4	Excellent	No	No	No	1	Not indicated	negative
12	9	Female	alive, living in this HH	alive, living in this HH	grade 3	Excellent	No	No	No	1	Not indicated	negative
13	13	Male	alive, other area	dead	grade 6	Excellent	No	No	No	1	Not indicated	negative
16	11	Female	alive, living in this HH	alive, living in this HH	grade 6	Excellent	No	No	No	1	Not indicated	negative
18	14	Female	alive, living in this HH	alive, living in this HH	form 1	Good	No	No	No	1	Not indicated	negative
19	9	Female	alive, living in this HH	alive, living in this HH	grade 1	Good	No	No	No	1	Not indicated	negative
20	15	Female	alive, living in this HH	alive, living in this HH	form 2	Excellent	No	No	No	1	Not indicated	negative
21	13	Female	alive, living in this HH	dead	grade 6	Excellent	No	No	No	1	Not indicated	negative
22	15	Female	alive, living in this HH	alive, living in this HH	form 3	Excellent	No	Yes	No	1	Not indicated	negative
23	10	Male	alive, living in this HH	alive, living in this HH	grade 4	Excellent	No	No	No	1	Not indicated	negative
24	15	Female	alive, living in this HH	alive, other area	form 2	Fair	No	No	No	1	Not indicated	negative
25	10	Female	alive, living in this HH	alive, living in this HH	grade 4	Excellent	No	No	No	1	Not indicated	negative
26	9	Female	alive, living in this HH	alive, living in this HH	grade 2	Excellent	No	No	No	1	Not indicated	negative
27	12	Male	alive, living in this HH	alive, living in this HH	grade 5	Excellent	No	No	No	1	Not indicated	negative
28	8	Female	alive, living in this HH	alive, living in this HH	grade 2	Excellent	No	No	No	1	Not indicated	negative
29	17	Female	alive, living in this HH	alive, living in this HH	form 4	Excellent	No	No	No	1	Not indicated	negative
30	8	Female	alive, living in this HH	alive, living in this HH	grade 1	Excellent	No	No	No	1	Not indicated	negative
31	17	Female	alive, another HH	alive, another HH		Good	No	No	No	1	Not indicated	negative
32	13	Female	alive, living in this HH	alive, living in this HH	grade 6	Excellent	No	No	No	1	Not indicated	negative
33	11	Female	alive, living in this HH	alive, living in this HH	grade 5	Good	No	No	No	1	Not indicated	negative
34	8	Female	alive, living in this HH	dead	grade 1	Excellent	No	No	No	1	Negative	negative
35	8	Female	alive, other area	alive, other area	grade 2	Excellent	No	No	No	1	Not indicated	negative
36	11	Female	alive, living in this HH	alive, living in this HH	grade 6	Good	No	No	No	1	Not indicated	negative
37	9	Female	alive, living in this HH	dead	grade 3	Excellent	No	No	No	1	Not indicated	negative
38	16	Male	alive, living in this HH	dead	grade 7	Good	Yes	Yes	No	1	Positive	positive
39	13	Male	alive, other area	alive, living in this HH	grade 7	Excellent	No	No	No	1	Not indicated	negative
40	14	Female	alive, living in this HH	alive, other area	form 1	Excellent	No	No	No	1	Not indicated	negative
42	9	Male	alive, living in this HH	alive, another HH	grade 3	Excellent	No	No	No	1	Not indicated	negative
44	9	Male	alive, living in this HH	alive, living in this HH	grade 3	Excellent	No	No	No	1	Not indicated	negative
50	11	Male	alive, living in this HH	alive, living in this HH	grade 5	Excellent	No	No	No	1	Not indicated	negative
51	11	Male	alive, living in this HH	alive, living in this HH	grade 5	Excellent	No	No	No	1	Not indicated	negative
53	9	Female	alive, living in this HH	alive, living in this HH	grade 3	Good	No	No	No	1	Not indicated	negative
54	14	Female	alive, living in this HH	alive, another HH	form 1	Excellent	No	No	No	1	Not indicated	negative
60	8	Female	alive, living in this HH	alive, living in this HH	grade 2	Excellent	No	No	Yes	1	Not indicated	negative
62	10	Male	alive, other country	alive, other country	grade 2	Excellent	No	No	No	1	Not indicated	negative
63	16	Female	alive, living in this HH	alive, living in this HH	form 2	Good	No	No	No	1	Not indicated	negative
70	13	Male	alive, living in this HH	alive, living in this HH	grade 6	Good	No	No	No	1	Not indicated	negative
71	16	Male	alive, living in this HH	alive, living in this HH	form 2	Excellent	No	No	No	1	Negative	negative
72	14	Female	alive, living in this HH	alive, living in this HH	form 1	Excellent	No	No	No	1	Not indicated	negative
73	8	Female	alive, living in this HH	alive, living in this HH	grade 3	Excellent	No	No	No	1	Not indicated	negative
74	10	Female	alive, living in this HH	alive, living in this HH	grade 5	Excellent	No	No	No	1	Not indicated	negative
75	8	Male	alive, living in this HH	alive, living in this HH	grade 2	Good	No	No	No	1	Not indicated	negative
76	11	Female	alive, living in this HH	alive, living in this HH	grade 6	Excellent	No	No	No	1	Not indicated	negative
77	8	Male	alive, living in this HH	dead	grade 1	Excellent	No	No	Yes	1	Negative	negative
78	10	Female	alive, living in this HH	alive, living in this HH	grade 3	Excellent	No	No	No	1	Negative	negative
79	15	Female	alive, living in this HH	dead	grade 7	Excellent	Yes	Yes	Yes	1	Positive	positive
80	15	Male	alive, living in this HH	alive, living in this HH	form 2	Good	No	No	No	1	Negative	negative
82	8	Female	alive, living in this HH	alive, living in this HH	grade 2	Good	No	No	No	1	Not indicated	negative
83	17	Female	alive, other area	alive, other area	form 2	Good	Yes	Yes	Yes	1	Negative	negative
85	15	Female	alive, another HH	alive, another HH	form 2	Excellent	No	No	No	1	Not indicated	negative
86	16	Female	alive, other country	dead	form 3	Good	No	No	No	1	Negative	negative
87	13	Male	alive, living in this HH	alive, living in this HH	grade 6	Excellent	No	No	No	1	Negative	negative
88	8	Male	alive, living in this HH	alive, living in this HH	grade 2	Excellent	Yes	Yes	No	1	Not indicated	negative
89	16	Female	alive, another HH	dead	form 3	Excellent	No	No	No	1	Negative	negative
90	16	Female	dead	dead	form 2	Good	No	No	No	1	Negative	negative
93	16	Female	alive, another HH	alive, another HH	grade 7	Excellent	No	No	No	1	Not indicated	negative
94	17	Female	alive, other country	dead	form 3	Excellent	No	No	No	1	Negative	negative
95	8	Female	alive, other country	alive, other country	grade 3	Excellent	No	No	No	1	Not indicated	negative
97	8	Male	alive, living in this HH	alive, other area	grade 2	Excellent	No	No	No	1	Negative	negative
100	10	Male	alive, living in this HH	alive, living in this HH	grade 5	Excellent	No	No	No	1	Negative	negative
101	14	Female	alive, other area	alive, other area	grade 7	Good	No	No	No	1	Not indicated	negative
103	13	Male	alive, other area	alive, living in this HH	grade 7	Good	No	No	No	1	Not indicated	negative
106	14	Female	alive, living in this HH	alive, living in this HH	form 1	Good	No	No	No	1	Not indicated	negative
107	11	Male	alive, living in this HH	alive, living in this HH	grade 5	Good	No	No	No	1	Not indicated	negative
109	16	Male	alive, other area	dead	form 3	Good	No	No	No	1	Not indicated	negative
110	9	Male	alive, living in this HH	alive, living in this HH	grade 3	Excellent	No	Yes	No	1	Not indicated	negative
111	8	Male	alive, living in this HH	alive, living in this HH	grade 3	Poor	No	No	No	1	Not indicated	negative
112	12	Male	alive, living in this HH	alive, living in this HH	grade 6	Fair	No	No	No	1	Not indicated	negative
118	8	Male	alive, living in this HH	alive, living in this HH	grade 2	Excellent	No	No	No	1	Not indicated	negative
119	11	Female	alive, other area	dead	grade 6	Excellent	No	No	No	1	Not indicated	negative
120	17	Female	alive, living in this HH	alive, living in this HH	form 4	Excellent	No	No	No	1	Not indicated	negative
121	8	Female	alive, other country	alive, other area	grade 2	Good	No	No	No	1	Not indicated	negative
122	10	Female	alive, another HH	alive, living in this HH	grade 3	Good	No	Yes	No	1	Not indicated	negative
123	15	Female	alive, other area	dead	form 1	Good	No	No	No	1	Not indicated	negative
124	16	Male	dead	alive, living in this HH	form 2	Good	No	No	No	1	Not indicated	negative
125	15	Female	alive, living in this HH	dead	form 2	Good	No	No	No	1	Not indicated	negative
126	8	Female	alive, living in this HH	alive, living in this HH	grade 3	Excellent	No	No	No	1	Not indicated	negative
127	12	Male	alive, living in this HH	alive, living in this HH	grade 6	Good	No	No	No	1	Not indicated	negative
128	9	Male	alive, living in this HH	alive, living in this HH	grade 4	Good	No	No	No	1	Not indicated	negative
129	9	Female	alive, living in this HH	alive, living in this HH	grade 3	Good	No	No	No	1	Not indicated	negative
133	10	Male	alive, living in this HH	alive, living in this HH	grade 4	Good	No	No	No	1	Not indicated	negative
136	17	Female	alive, other area	alive, other area	form 4	Good	No	No	Yes	1	Not indicated	negative
137	16	Male	alive, another HH	dead	form 3	Excellent	No	No	No	1	Not indicated	negative
139	16	Male	alive, living in this HH	alive, living in this HH	form 2	Excellent	No	No	No	1	Not indicated	negative
141	16	Female	dead	dead	grade 5	Good	No	No	No	1	Negative	negative
144	13	Male	alive, living in this HH	alive, living in this HH	form 1	Excellent	No	No	No	1	Negative	negative
145	11	Female	alive, living in this HH	alive, living in this HH	grade 5	Excellent	No	No	No	1	Not indicated	negative
147	9	Male	alive, other area	alive, other area	grade 4	Excellent	No	Yes	No	1	Not indicated	negative
148	9	Female	alive, living in this HH	alive, living in this HH	grade 4	Good	No	No	No	1	Not indicated	negative
149	8	Male	dead	dead	grade 2	Excellent	No	No	No	1	Not indicated	negative
150	17	Female	alive, living in this HH	alive, living in this HH	form 4	Excellent	No	No	No	1	Negative	negative
151	9	Female	alive, living in this HH	alive, living in this HH	grade 3	Excellent	No	No	No	1	Negative	negative
152	10	Female	alive, living in this HH	alive, living in this HH	grade 5	Good	No	No	No	1	Not indicated	negative
153	17	Female	dead	alive, living in this HH	form 4	Excellent	No	No	Yes	1	Negative	negative
154	9	Female	alive, living in this HH	alive, living in this HH	grade 3	Excellent	No	No	Yes	1	Not indicated	negative
155	13	Female	alive, living in this HH	alive, living in this HH	form 1	Good	No	Yes	Yes	1	Not indicated	negative
156	15	Male	dead	alive, other area	grade 6	Good	No	No	No	1	Not indicated	negative
157	11	Female	alive, living in this HH	alive, living in this HH	grade 5	Excellent	No	No	No	1	Not indicated	negative
160	14	Female	alive, living in this HH	alive, living in this HH	grade 7	Good	No	No	Yes	1	Not indicated	negative
161	16	Female	alive, living in this HH	dead	form 4	Fair	No	Yes	No	1	Negative	positive
162	9	Female	alive, living in this HH	alive, living in this HH	grade 3	Good	No	No	No	1	Not indicated	negative
164	9	Female	dead	alive, living in this HH	grade 4	Poor	No	No	Yes	1	Positive	positive
166	15	Female	alive, living in this HH	alive, living in this HH	form 4	Good	No	No	No	1	Not indicated	negative
169	8	Male	alive, living in this HH	alive, living in this HH	grade 3	Good	No	Yes	No	1	Not indicated	negative
173	13	Female	alive, living in this HH	alive, living in this HH	grade 7	Excellent	No	No	No	1	Not indicated	negative
174	11	Male	alive, living in this HH	alive, living in this HH	grade 6	Excellent	No	No	No	1	Not indicated	negative
178	13	Female	alive, other area	alive, other area	form 1	Good	No	No	Yes	1	Not indicated	negative
179	9	Male	alive, living in this HH	alive, living in this HH	grade 3	Excellent	No	Yes	No	1	Not indicated	negative
180	13	Female	alive, living in this HH	alive, living in this HH	grade 7	Good	No	Yes	No	1	Not indicated	negative
181	10	Male	alive, living in this HH	alive, living in this HH	grade 4	Excellent	No	No	No	1	Not indicated	negative
182	17	Male	alive, living in this HH	alive, living in this HH	form 3	Good	No	No	No	1	Not indicated	negative
184	9	Male	alive, another HH	alive, another HH	grade 4	Good	No	No	No	1	Not indicated	negative
185	15	Female	alive, another HH	alive, another HH	form 2	Excellent	No	No	No	1	Not indicated	negative
186	10	Female	alive, living in this HH	alive, living in this HH	grade 4	Excellent	No	No	No	1	Not indicated	negative
187	13	Male	alive, living in this HH	alive, other country	form 1	Excellent	No	No	No	1	Not indicated	negative
188	8	Female	alive, living in this HH	alive, other area	grade 2	Excellent	No	No	No	1	Not indicated	negative
190	12	Male	alive, living in this HH	alive, living in this HH	grade 7	Excellent	No	No	No	1	Not indicated	negative
191	9	Male	alive, living in this HH	alive, living in this HH	grade 2	Good	No	No	No	1	Not indicated	negative
192	11	Male	alive, living in this HH	alive, living in this HH	grade 4	Excellent	No	No	No	1	Not indicated	negative
193	13	Female	alive, living in this HH	alive, another HH	grade 6	Excellent	No	No	No	1	Not indicated	negative
194	10	Male	alive, living in this HH	alive, living in this HH	grade 4	Good	No	No	No	1	Not indicated	negative
1033	17	Female	dead	alive, other area	form 4	Excellent	No	No	No	1	Not indicated	negative
1034	10	Male	alive, living in this HH	alive, living in this HH	grade 3	Excellent	No	No	No	1	Not indicated	negative
1035	17	Female	alive, other area	alive, other area	form 3	Good	No	No	No	1	Negative	negative
1036	9	Male	alive, living in this HH	alive, living in this HH	grade 3	Excellent	No	No	No	1	Not indicated	negative
1037	14	Male	alive, living in this HH	alive, living in this HH	form 1	Excellent	No	No	No	1	Not indicated	negative
1038	12	Female	alive, living in this HH	alive, living in this HH	grade 6	Good	No	No	No	1	Not indicated	negative
1039	12	Female	alive, living in this HH	alive, living in this HH	grade 4	Excellent	No	No	No	1	Not indicated	negative
1040	8	Male	alive, living in this HH	alive, living in this HH	grade 3	Excellent	No	No	No	1	Not indicated	negative
1041	12	Male	alive, another HH	alive, living in this HH	grade 5	Excellent	No	No	No	1	Not indicated	negative
1042	15	Male	alive, living in this HH	alive, other area	grade 7	Good	No	No	No	1	Not indicated	negative
1044	9	Male	alive, another HH	alive, other area	grade 3	Good	No	No	No	1	Not indicated	negative
1045	8	Female	alive, living in this HH	alive, living in this HH	grade 1	Good	No	No	No	1	Not indicated	negative
1046	11	Female	alive, another HH	alive, other area	grade 5	Fair	No	No	No	1	Not indicated	negative
1047	13	Female	alive, living in this HH	alive, living in this HH	grade 6	Excellent	No	No	No	1	Negative	negative
1048	15	Male	dead	dead	grade 7	Poor	No	Yes	No	1	Positive	positive
1049	12	Female	alive, another HH	alive, other country	grade 6	Excellent	No	No	No	1	Not indicated	negative
1050	17	Male	alive, other country	dead	form 4	Excellent	No	No	No	1	Negative	negative
1051	13	Female	alive, another HH	alive, another HH	grade 7	Good	No	No	No	1	Not indicated	negative
1052	11	Male	alive, other country	dead	grade 5	Excellent	No	No	No	1	Not indicated	negative
1053	15	Male	alive, living in this HH	alive, living in this HH	form 1	Excellent	No	No	No	1	Negative	negative
1054	13	Male	alive, living in this HH	alive, living in this HH	form 1	Excellent	No	No	No	1	Negative	negative
1055	8	Male	alive, living in this HH	alive, living in this HH	grade 2	Good	No	No	No	1	Not indicated	negative
1063	10	Male	alive, living in this HH	alive, living in this HH	grade 5	Good	No	No	No	1	Not indicated	negative
1064	15	Female	alive, living in this HH	alive, living in this HH	grade 7	Good	No	No	No	1	Not indicated	negative
1065	16	Male	dead	dead	form 3	Good	No	No	No	1	Negative	negative
1066	15	Female	alive, living in this HH	alive, living in this HH	grade 7	Good	No	No	No	1	Not indicated	negative
1067	17	Male	alive, living in this HH	dead	form 3	Good	No	No	No	1	Not indicated	negative
1068	14	Male	alive, living in this HH	alive, living in this HH	grade 7	Good	No	No	No	1	Not indicated	negative
1071	17	Female	alive, other area	dead	form 4	Fair	No	No	No	1	Not indicated	negative
1072	8	Male	alive, other country	alive, other country	grade 3	Excellent	No	No	No	1	Not indicated	negative
1073	16	Female	alive, living in this HH	alive, other area	form 4	Excellent	No	No	No	1	Not indicated	negative
1074	10	Female	alive, living in this HH	alive, living in this HH	grade 6	Excellent	No	No	No	1	Not indicated	negative
1076	16	Male	alive, living in this HH	alive, other area	form 3	Good	No	No	No	1	Not indicated	negative
1077	9	Male	alive, other area	dead	grade 3	Good	No	No	No	1	Not indicated	negative
1078	14	Male	alive, living in this HH	alive, living in this HH	form 1	Good	No	No	No	1	Not indicated	negative
1080	17	Male	alive, living in this HH	alive, living in this HH	form 3	Fair	No	No	No	1	Not indicated	negative
1081	10	Female	alive, living in this HH	alive, living in this HH	grade 5	Good	No	No	No	1	Not indicated	negative
1082	12	Male	alive, living in this HH	alive, living in this HH	grade 6	Good	No	No	No	1	Not indicated	negative
1083	13	Female	alive, living in this HH	alive, living in this HH	grade 7	Good	No	No	No	1	Not indicated	negative
1085	15	Female	alive, other area	dead	form 3	Excellent	No	No	No	1	Not indicated	negative
1086	15	Male	alive, living in this HH	alive, living in this HH	form 4	Excellent	No	No	No	1	Not indicated	negative
1088	14	Male	alive, living in this HH	alive, living in this HH	form 1	Excellent	No	No	No	1	Not indicated	negative
1089	12	Female	alive, living in this HH	alive, another HH	grade 7	Good	No	No	No	1	Not indicated	negative
1091	17	Male	alive, other area	alive, other area	form 2	Excellent	No	No	No	1	Not indicated	negative
1092	11	Male	alive, living in this HH	alive, living in this HH	grade 5	Good	No	No	No	1	Not indicated	negative
1093	13	Male	alive, another HH	alive, another HH	grade 4	Excellent	No	No	No	1	Not indicated	negative
1094	16	Male	alive, living in this HH	alive, living in this HH	form 3	Excellent	No	No	No	1	Not indicated	negative
1095	17	Female	alive, living in this HH	alive, living in this HH	form 3	Excellent	No	No	No	1	Not indicated	negative
1096	16	Female	alive, living in this HH	alive, other area	form 4	Poor	No	Yes	Yes	1	Not indicated	negative
1097	12	Male	alive, living in this HH	alive, living in this HH	grade 7	Good	No	Yes	No	1	Not indicated	negative
1098	11	Male	alive, living in this HH	alive, living in this HH	grade 5	Excellent	No	No	No	1	Not indicated	negative
1100	17	Male	alive, living in this HH	alive, living in this HH	form 3	Excellent	No	No	No	1	Not indicated	negative
1101	8	Female	alive, living in this HH	alive, living in this HH	grade 3	Excellent	No	No	No	1	Not indicated	negative
1102	11	Female	alive, living in this HH	alive, another HH	grade 5	Excellent	No	No	No	1	Not indicated	negative
1103	16	Female	dead	dead	grade 7	Excellent	No	No	No	1	Not indicated	negative
1104	15	Female	dead	dead	form 1	Excellent	No	No	No	1	Not indicated	negative
1105	13	Male	alive, living in this HH	alive, other area	grade 7	Poor	No	No	No	1	Not indicated	negative
1106	17	Female	alive, living in this HH	alive, another HH	form 3	Good	No	No	No	1	Not indicated	negative
1107	10	Male	alive, living in this HH	alive, other country	grade 3	Fair	No	No	Yes	1	Not indicated	negative
1109	15	Male	alive, living in this HH	alive, living in this HH	form 1	Excellent	No	No	No	1	Not indicated	negative
1110	13	Female	alive, living in this HH	alive, living in this HH	grade 7	Excellent	No	No	No	1	Not indicated	negative
1111	13	Male	alive, living in this HH	alive, another HH	form 1	Excellent	No	No	No	1	Negative	negative
1112	14	Male	dead	dead	grade 7	Fair	No	No	No	1	Not indicated	negative
1113	11	Female	dead	alive, another HH	grade 5	Good	No	No	Yes	1	Not indicated	negative
1114	12	Male	alive, living in this HH	alive, living in this HH	grade 5	Good	No	Yes	Yes	1	Not indicated	negative
1115	12	Female	alive, living in this HH	alive, another HH	grade 6	Excellent	No	No	No	1	Not indicated	negative
1116	8	Female	alive, living in this HH	alive, another HH	grade 2	Excellent	No	No	No	1	Not indicated	negative
1117	11	Male	alive, living in this HH	alive, other area	grade 5	Good	No	No	No	1	Not indicated	negative
1118	15	Male	alive, living in this HH	alive, other area	form 3	Good	No	No	No	1	Negative	negative
1119	8	Female	alive, living in this HH	alive, another HH	grade 3	Good	No	No	No	1	Negative	negative
1120	14	Male	alive, living in this HH	alive, other area	form 1	Good	No	No	No	1	Not indicated	negative
1121	9	Female	alive, living in this HH	alive, living in this HH	grade 2	Good	No	No	No	1	Negative	negative
1123	16	Male	alive, living in this HH	alive, living in this HH	form 3	Good	No	No	No	1	Not indicated	negative
1124	8	Female	alive, living in this HH	alive, living in this HH	grade 3	Good	No	No	No	1	Not indicated	negative
1125	13	Female	alive, living in this HH	alive, another HH	grade 6	Good	No	No	No	1	Not indicated	negative
1126	9	Male	alive, living in this HH	alive, living in this HH	grade 2	Good	No	No	No	1	Not indicated	negative
1127	15	Female	alive, living in this HH	alive, living in this HH	form 1	Good	No	No	No	1	Not indicated	negative
1128	8	Male	alive, living in this HH	alive, another HH	grade 2	Good	No	No	No	1	Not indicated	negative
1129	9	Female	alive, other area	alive, other area	grade 3	Good	No	No	No	1	Not indicated	negative
1130	16	Female	alive, other country	alive, another HH	form 3	Good	No	No	No	1	Not indicated	negative
1131	10	Female	alive, living in this HH	alive, living in this HH	grade 2	Excellent	No	No	No	1	Not indicated	negative
1132	8	Female	alive, living in this HH	alive, living in this HH	grade 2	Good	No	No	No	1	Not indicated	negative
1133	15	Female	alive, another HH	alive, another HH	form 1	Good	No	No	No	1	Not indicated	negative
1134	10	Female	alive, living in this HH	alive, living in this HH	grade 3	Excellent	No	No	No	1	Not indicated	negative
1135	17	Female	alive, living in this HH	alive, living in this HH	form 3	Excellent	No	No	No	1	Not indicated	negative
1138	9	Female	alive, living in this HH	alive, another HH	grade 2	Good	No	No	No	1	Not indicated	negative
1139	13	Male	alive, living in this HH	alive, living in this HH	grade 7	Excellent	No	No	No	1	Not indicated	negative
1140	15	Female	alive, living in this HH	alive, living in this HH	form 3	Excellent	No	No	No	1	Not indicated	negative
1146	9	Female	alive, living in this HH	alive, living in this HH	grade 3	Good	No	No	No	1	Not indicated	negative
1149	13	Male	alive, living in this HH	alive, living in this HH	grade 7	Good	No	No	No	1	Not indicated	negative
1151	16	Male	alive, living in this HH	alive, living in this HH	form 2	Excellent	No	No	No	1	Not indicated	negative
1153	16	Male	alive, other area	alive, living in this HH	form 3	Excellent	No	No	No	1	Negative	negative
1154	13	Male	alive, another HH	alive, another HH	grade 7	Excellent	No	No	No	1	Not indicated	negative
1155	9	Female	alive, another HH	alive, living in this HH	grade 1	Excellent	No	No	No	1	Not indicated	negative
1156	11	Male	alive, living in this HH	alive, living in this HH	grade 5	Excellent	No	No	No	1	Not indicated	negative
1158	14	Male	alive, another HH	alive, living in this HH	grade 2	Good	No	No	No	1	Not indicated	negative
1160	15	Female	alive, living in this HH	alive, another HH	form 2	Excellent	No	No	No	1	Negative	negative
1161	17	Male	alive, other area	dead	form 4	Good	No	No	No	1	Not indicated	negative
1162	13	Male	alive, another HH	alive, living in this HH	grade 6	Excellent	No	No	No	1	Not indicated	negative
1163	13	Male	alive, living in this HH	alive, living in this HH	form 2	Excellent	No	No	No	1	Not indicated	negative
1165	10	Male	dead	alive, other country	grade 4	Good	No	Yes	No	1	Positive	positive
1167	8	Female	dead	dead	grade 2	Good	No	No	No	1	Positive	positive
1169	10	Female	alive, living in this HH	alive, living in this HH	grade 5	Excellent	No	No	No	1	Not indicated	negative
1170	11	Male	alive, living in this HH	dead	grade 4	Good	No	No	No	1	Not indicated	negative
1172	8	Male	alive, living in this HH	alive, other country	grade 2	Good	No	No	No	1	Negative	negative
1173	8	Male	alive, another HH	alive, living in this HH	grade 1	Excellent	No	No	No	1	Not indicated	negative
1174	10	Female	alive, living in this HH	alive, another HH	grade 6	Good	No	No	No	1	Not indicated	negative
1175	15	Male	dead	alive, living in this HH	form 1	Good	No	No	No	1	Not indicated	negative
1176	10	Female	alive, living in this HH	alive, living in this HH	grade 4	Excellent	No	No	No	1	Not indicated	negative
1177	10	Female	alive, living in this HH	alive, living in this HH	grade 4	Excellent	No	No	No	1	Not indicated	negative
1181	16	Female	alive, other country	alive, living in this HH	form 3	Excellent	No	No	No	1	Not indicated	negative
1182	17	Female	alive, other area	alive, other area	form 1	Fair	No	No	No	1	Not indicated	negative
1183	17	Female	alive, living in this HH	alive, living in this HH	form 4	Excellent	No	No	Yes	1	Not indicated	negative
1184	17	Female	dead	alive, another HH	form 4	Excellent	No	No	Yes	1	Negative	negative
1185	13	Male	alive, living in this HH	dead	form 1	Good	No	No	No	1	Not indicated	negative
1186	9	Male	alive, other country	alive, other country	grade 2	Good	No	Yes	No	1	Not indicated	negative
1187	10	Female	alive, living in this HH	alive, living in this HH	grade 4	Good	No	No	No	1	Not indicated	positive
1188	11	Female	alive, other country	alive, other country	grade 4	Excellent	No	No	No	1	Not indicated	negative
1189	14	Male	alive, living in this HH	alive, living in this HH	form 1	Good	No	No	No	1	Not indicated	negative
1190	9	Female	alive, other country	alive, living in this HH	grade 4	Excellent	No	No	Yes	1	Negative	negative
1191	14	Female	alive, living in this HH	alive, other area	grade 4	Good	No	No	No	1	Not indicated	negative
1192	17	Male	alive, living in this HH	alive, living in this HH	form 4	Good	No	No	No	1	Negative	negative
1193	11	Female	alive, living in this HH	dead	grade 4	Fair	No	Yes	Yes	1	Negative	negative
1194	10	Female	alive, living in this HH	alive, living in this HH	grade 4	Excellent	No	Yes	No	1	Not indicated	negative
1195	10	Male	alive, living in this HH	alive, other area	grade 3	Good	No	No	No	1	Not indicated	negative
1196	9	Male	alive, living in this HH	alive, living in this HH	grade 3	Good	No	No	No	1	Not indicated	negative
1197	14	Male	dead	alive, living in this HH	grade 7	Good	No	No	No	1	Not indicated	negative
1198	13	Male	alive, living in this HH	dead	grade 6	Good	No	No	No	1	Not indicated	negative
1199	16	Female	dead	dead	form 3	Excellent	No	No	No	1	Not indicated	negative
1200	11	Female	alive, other area	alive, other area	grade 6	Excellent	No	No	No	1	Not indicated	negative
1201	13	Female	alive, other area	alive, other country	grade 7	Excellent	No	No	No	1	Not indicated	negative
1202	13	Male	alive, another HH	alive, another HH	grade 6	Good	No	Yes	No	1	Negative	negative
1203	17	Male	alive, living in this HH	alive, living in this HH	form 4	Excellent	No	No	No	1	Negative	negative
1204	16	Male	alive, living in this HH	alive, living in this HH	grade 7	Good	No	No	No	1	Not indicated	negative
1206	14	Female	dead	dead	grade 6	Good	No	No	No	1	Not indicated	negative
1207	14	Male	dead	alive, other country	grade 5	Good	No	Yes	Yes	1	Not indicated	negative
1208	10	Female	alive, living in this HH	alive, other country	grade 4	Excellent	No	No	Yes	1	Not indicated	negative
1209	16	Female	alive, other area	alive, other area	form 3	Excellent	No	No	No	1	Not indicated	negative
1210	16	Female	dead	dead	form 1	Good	No	No	No	1	Not indicated	negative
1211	12	Male	alive, living in this HH	dead	grade 5	Excellent	No	No	No	1	Not indicated	negative
1212	14	Male	alive, other country	alive, other country	grade 6	Excellent	No	No	No	1	Not indicated	negative
1214	12	Female	alive, living in this HH	alive, living in this HH	grade 6	Good	No	No	No	1	Not indicated	negative
1215	17	Female	alive, other country	alive, other country	form 4	Excellent	No	No	No	1	Not indicated	negative
1216	16	Female	alive, living in this HH	alive, another HH	grade 7	Excellent	No	No	No	1	Not indicated	negative
1217	8	Female	alive, other country	alive, other country	grade 2	Excellent	No	No	No	1	Not indicated	negative
1218	9	Female	alive, living in this HH	alive, another HH	grade 4	Excellent	No	No	No	1	Not indicated	negative
1219	13	Female	alive, another HH	alive, another HH	form 1	Excellent	No	No	No	1	Not indicated	negative
1220	13	Male	alive, living in this HH	alive, living in this HH	form 1	Excellent	No	No	No	1	Not indicated	negative
1221	16	Male	alive, another HH	alive, another HH	grade 7	Excellent	No	No	No	1	Not indicated	negative
1223	8	Male	alive, living in this HH	alive, living in this HH	grade 1	Good	No	No	No	1	Not indicated	negative
1224	12	Male	alive, living in this HH	alive, another HH	grade 5	Excellent	No	No	No	1	Not indicated	negative
1225	8	Female	alive, living in this HH	alive, living in this HH	grade 2	Excellent	No	No	No	1	Not indicated	negative
1226	10	Female	alive, living in this HH	alive, living in this HH	grade 4	Good	No	No	No	1	Not indicated	negative
1227	10	Female	alive, living in this HH	alive, another HH	grade 4	Excellent	No	No	No	1	Not indicated	negative
1228	8	Male	alive, living in this HH	alive, another HH	grade 2	Excellent	No	No	No	1	Not indicated	negative
1229	12	Female	alive, living in this HH	alive, living in this HH	grade 6	Good	No	No	No	1	Not indicated	negative
1230	11	Male	alive, living in this HH	alive, living in this HH	grade 6	Good	No	No	No	1	Not indicated	negative
1231	8	Male	alive, living in this HH	alive, living in this HH	grade 2	Excellent	No	No	No	1	Not indicated	negative
1233	15	Male	alive, living in this HH	alive, living in this HH	form 1	Excellent	No	No	No	1	Not indicated	negative
1234	10	Female	alive, living in this HH	alive, another HH	grade 5	Excellent	No	No	No	1	Not indicated	negative
1235	13	Female	alive, living in this HH	alive, living in this HH	grade 7	Excellent	No	No	No	1	Not indicated	negative
1236	8	Female	alive, living in this HH	alive, living in this HH	grade 1	Good	No	No	No	1	Not indicated	negative
1237	10	Female	alive, living in this HH	alive, living in this HH	grade 4	Good	No	No	No	1	Not indicated	negative
1238	17	Female	alive, living in this HH	alive, living in this HH	form 4	Excellent	No	Yes	No	1	Not indicated	negative
1239	13	Male	alive, living in this HH	alive, living in this HH	grade 6	Good	No	No	No	1	Not indicated	negative
1240	10	Female	alive, living in this HH	alive, living in this HH	grade 4	Good	No	No	No	1	Not indicated	negative
1244	17	Male	alive, living in this HH	dead	form 2	Excellent	No	No	No	1	Not indicated	negative
1245	16	Male	alive, another HH	alive, other country	form 3	Excellent	No	No	No	1	Not indicated	negative
1246	17	Male	alive, living in this HH	alive, living in this HH	form 4	Excellent	No	No	No	1	Not indicated	negative
1247	17	Female	dead	dead	form 3	Good	No	No	No	1	Not indicated	negative
1248	8	Male	alive, living in this HH	alive, another HH	grade 2	Excellent	No	No	Yes	1	Not indicated	negative
1249	14	Male	alive, living in this HH	dead	form 1	Excellent	No	No	No	1	Not indicated	negative
1250	15	Female	alive, other area	alive, other area	form 2	Good	No	No	No	1	Not indicated	negative
1251	15	Female	alive, other area	alive, another HH	form 1	Good	No	No	Yes	1	Not indicated	negative
1252	11	Female	alive, other area	alive, other country	grade 5	Excellent	No	No	No	1	Not indicated	negative
1253	10	Female	alive, living in this HH	alive, other area	grade 4	Good	No	No	No	1	Not indicated	negative
1254	17	Female	alive, living in this HH	alive, living in this HH	form 3	Excellent	No	No	No	1	Not indicated	negative
1255	10	Male	alive, living in this HH	alive, living in this HH	grade 4	Good	No	No	No	1	Not indicated	negative
1256	12	Male	alive, living in this HH	dead	grade 5	Excellent	No	No	No	1	Not indicated	negative
1257	9	Male	alive, living in this HH	alive, living in this HH	grade 4	Excellent	No	No	No	1	Not indicated	negative
1258	13	Female	alive, living in this HH	dead	grade 6	Excellent	No	No	No	1	Not indicated	negative
1259	9	Male	alive, living in this HH	dead	grade 2	Excellent	No	No	No	1	Negative	negative
1260	11	Female	dead	dead	grade 5	Excellent	No	No	No	1	Not indicated	negative
1261	10	Female	alive, living in this HH	alive, living in this HH	grade 4	Excellent	No	No	No	1	Not indicated	negative
1262	12	Male	alive, living in this HH	alive, living in this HH	grade 6	Excellent	No	No	No	1	Negative	negative
1263	17	Female	alive, living in this HH	alive, living in this HH	form 3	Excellent	No	No	No	1	Negative	negative
1266	16	Male	dead	dead	form 2	Excellent	No	No	No	1	Not indicated	negative
1267	12	Male	dead	dead	grade 3	Excellent	No	No	No	1	Not indicated	negative
1268	13	Male	alive, another HH	alive, another HH	grade 6	Good	No	No	No	1	Not indicated	negative
1269	16	Female	alive, another HH	alive, another HH	form 3	Good	No	No	No	1	Not indicated	negative
1273	11	Female	alive, other country	alive, other country	grade 6	Good	No	No	No	1	Not indicated	negative
1276	8	Male	alive, living in this HH	dead	grade 3	Excellent	No	No	No	1	Not indicated	negative
1277	8	Male	alive, living in this HH	alive, other country	grade 3	Excellent	No	No	No	1	Not indicated	negative
1278	12	Female	alive, living in this HH	alive, living in this HH	grade 6	Fair	No	No	No	1	Not indicated	negative
1281	12	Female	alive, living in this HH	alive, other country	grade 6	Excellent	No	No	No	1	Not indicated	negative
1282	10	Male	alive, living in this HH	alive, living in this HH	grade 2	Good	No	No	No	1	Not indicated	negative
1283	8	Male	alive, living in this HH	alive, living in this HH	grade 2	Good	No	No	No	1	Not indicated	negative
1734	11	Female	alive, living in this HH	dead	grade 5	Good	No	Yes	No	1	Negative	negative
1735	12	Female	alive, other area	dead	grade 7	Good	No	No	No	1	Not indicated	negative
1736	13	Female	alive, living in this HH	alive, living in this HH	grade 7	Good	No	No	No	1	Negative	negative
1737	9	Male	alive, another HH	alive, other country	grade 4	Good	No	No	No	1	Not indicated	negative
1738	15	Male	alive, living in this HH	alive, living in this HH	grade 7	Good	No	No	No	1	Not indicated	negative
1739	14	Female	alive, living in this HH	alive, living in this HH	form 1	Good	No	No	No	1	Not indicated	negative
1742	14	Female	alive, other country	dead	form 1	Good	No	No	No	1	Not indicated	negative
1743	15	Male	alive, living in this HH	alive, living in this HH	form 3	Excellent	No	No	No	1	Not indicated	negative
1744	15	Female	alive, living in this HH	alive, living in this HH	form 1	Good	No	No	No	1	Not indicated	negative
1745	12	Female	alive, other country	dead	grade 4	Good	No	No	No	1	Not indicated	negative
1746	12	Female	alive, living in this HH	alive, living in this HH	grade 6	Good	No	No	No	1	Not indicated	negative
1747	8	Male	alive, other area	alive, other area	grade 1	Good	No	No	No	1	Not indicated	negative
1749	10	Female	alive, living in this HH	alive, living in this HH	grade 4	Good	No	No	No	1	Not indicated	negative
1750	10	Male	alive, living in this HH	dead	grade 2	Good	No	No	No	1	Not indicated	negative
1751	10	Male	alive, living in this HH	alive, living in this HH	grade 2	Good	No	No	No	1	Not indicated	negative
1752	10	Male	alive, other country	alive, another HH	grade 5	Good	No	No	No	1	Not indicated	negative
1753	16	Female	alive, other country	dead	form 3	Good	No	No	No	1	Not indicated	negative
1754	13	Male	alive, other country	dead	grade 6	Good	No	No	No	1	Not indicated	negative
1755	14	Female	alive, living in this HH	alive, living in this HH	form 1	Good	No	No	No	1	Not indicated	negative
1756	8	Male	alive, living in this HH	alive, living in this HH	grade 2	Good	No	No	No	1	Not indicated	negative
1757	11	Male	alive, living in this HH	alive, living in this HH	grade 6	Good	No	No	No	1	Not indicated	negative
1759	13	Male	alive, living in this HH	alive, living in this HH	grade 7	Good	No	No	No	1	Not indicated	negative
1760	12	Male	alive, living in this HH	alive, another HH	grade 6	Good	No	No	No	1	Not indicated	negative
1761	17	Male	alive, other country	alive, other country	form 4	Excellent	No	No	No	1	Not indicated	negative
1762	9	Male	alive, living in this HH	alive, living in this HH	grade 2	Excellent	No	No	No	1	Not indicated	negative
1763	11	Female	alive, living in this HH	alive, living in this HH	grade 4	Good	No	No	No	1	Not indicated	negative
1764	11	Male	alive, other country	dead	grade 5	Excellent	No	No	No	1	Not indicated	negative
1765	9	Female	alive, living in this HH	alive, other country	grade 3	Good	No	No	No	1	Not indicated	negative
1766	10	Female	alive, living in this HH	alive, living in this HH	grade 3	Good	No	No	No	1	Not indicated	negative
1767	13	Female	alive, another HH	alive, another HH	grade 7	Excellent	No	No	No	1	Not indicated	negative
1768	14	Female	alive, another HH	alive, another HH	grade 5	Excellent	No	No	No	1	Not indicated	negative
1769	8	Male	alive, living in this HH	alive, other country	grade 2	Good	No	No	No	1	Negative	negative
1770	11	Female	alive, living in this HH	alive, other country	grade 4	Good	No	No	No	1	Not indicated	negative
1771	16	Male	alive, living in this HH	alive, living in this HH	form 2	Good	No	No	No	1	Not indicated	positive
1772	17	Female	alive, another HH	alive, other country	form 4	Good	No	No	No	1	Negative	negative
1773	17	Male	alive, other area	dead	form 4	Excellent	No	No	No	1	Not indicated	negative
1775	14	Female	alive, living in this HH	dead	grade 6	Good	No	No	No	1	Not indicated	negative
1776	9	Female	alive, living in this HH	alive, other area	grade 2	Good	No	No	No	1	Not indicated	negative
1777	14	Female	alive, another HH	alive, another HH	form 2	Good	No	No	No	1	Negative	negative
1778	16	Male	alive, living in this HH	alive, living in this HH	form 4	Good	No	No	No	1	Not indicated	negative
1779	9	Male	alive, living in this HH	alive, living in this HH	grade 4	Excellent	No	No	No	1	Not indicated	negative
1780	11	Male	alive, other country	alive, other country	grade 6	Good	No	No	No	1	Not indicated	negative
1781	15	Male	alive, another HH	dead	form 1	Excellent	No	No	No	1	Not indicated	negative
1782	16	Male	dead	dead	grade 7	Good	No	No	No	1	Negative	negative
1783	12	Male	alive, living in this HH	dead	grade 6	Fair	No	No	No	1	Negative	negative
1784	8	Male	alive, living in this HH	alive, living in this HH	grade 2	Good	No	No	No	1	Not indicated	negative
1785	9	Male	alive, living in this HH	alive, living in this HH	grade 4	Good	No	No	No	1	Not indicated	negative
1786	15	Male	alive, living in this HH	alive, living in this HH	form 2	Good	No	No	No	1	Not indicated	negative
1787	12	Male	alive, living in this HH	alive, living in this HH	grade 5	Good	No	No	No	1	Not indicated	negative
1788	14	Male	alive, living in this HH	alive, living in this HH	form 2	Excellent	No	Yes	No	1	Negative	negative
1789	8	Male	alive, living in this HH	alive, living in this HH	grade 1	Good	No	No	No	1	Not indicated	negative
1790	10	Male	alive, living in this HH	alive, another HH	grade 3	Excellent	No	No	No	1	Not indicated	negative
1791	14	Female	alive, living in this HH	alive, another HH	form 1	Excellent	No	No	No	1	Not indicated	negative
1793	17	Female	alive, another HH	alive, another HH	form 4	Excellent	No	No	No	1	Not indicated	negative
1794	13	Male	alive, living in this HH	alive, living in this HH	grade 7	Excellent	No	No	No	1	Not indicated	negative
1795	8	Male	alive, living in this HH	alive, living in this HH	grade 1	Excellent	No	No	No	1	Not indicated	negative
1796	14	Female	alive, living in this HH	alive, living in this HH	form 3	Excellent	No	No	No	1	Not indicated	negative
1797	17	Male	alive, living in this HH	alive, living in this HH	form 4	Excellent	No	No	No	1	Not indicated	negative
1798	9	Male	alive, living in this HH	alive, living in this HH	grade 1	Excellent	No	No	No	1	Not indicated	negative
1799	13	Female	alive, another HH	alive, another HH	grade 5	Excellent	No	No	No	1	Not indicated	negative
1800	14	Male	alive, another HH	alive, another HH	grade 5	Good	No	No	No	1	Not indicated	negative
1801	16	Male	alive, other area	alive, living in this HH	form 3	Excellent	No	No	No	1	Not indicated	negative
1802	9	Female	alive, another HH	alive, another HH	grade 3	Good	No	No	No	1	Not indicated	negative
1803	9	Female	alive, living in this HH	alive, living in this HH	grade 3	Excellent	No	No	No	1	Not indicated	negative
1804	8	Male	alive, living in this HH	alive, living in this HH	grade 3	Excellent	No	No	No	1	Positive	negative
1805	12	Female	alive, living in this HH	alive, living in this HH	grade 6	Excellent	No	No	No	1	Not indicated	negative
1806	9	Female	alive, another HH	alive, another HH	grade 5	Excellent	No	No	No	1	Not indicated	negative
1807	9	Male	alive, another HH	alive, another HH	grade 3	Excellent	No	No	No	1	Not indicated	negative
1808	14	Female	alive, living in this HH	alive, living in this HH	form 2	Excellent	No	No	No	1	Not indicated	negative
1809	16	Male	dead	dead		Good	No	No	No	1	Not indicated	negative
1810	15	Female	dead	don't know	grade 7	Excellent	No	No	No	1	Not indicated	negative
1811	16	Female	alive, another HH	dead	form 3	Good	No	Yes	No	1	Not indicated	negative
1813	12	Male	alive, another HH	alive, living in this HH	grade 5	Good	No	No	No	1	Negative	negative
1814	13	Male	alive, living in this HH	alive, living in this HH	grade 6	Good	No	No	No	1	Negative	negative
1815	14	Female	alive, other area	alive, living in this HH	form 2	Good	No	No	No	1	Not indicated	negative
1816	15	Female	alive, other area	alive, living in this HH	form 4	Good	No	No	Yes	1	Not indicated	negative
1817	17	Female	alive, another HH	alive, another HH	form 2	Good	No	Yes	No	1	Negative	negative
1818	15	Female	alive, living in this HH	alive, living in this HH	form 2	Good	No	No	No	1	Not indicated	negative
1819	13	Male	alive, another HH	alive, living in this HH	grade 7	Fair	No	No	No	1	Negative	negative
1820	14	Female	dead	alive, living in this HH	form 2	Good	No	No	No	1	Not indicated	negative
1821	10	Female	alive, living in this HH	alive, living in this HH	grade 4	Fair	No	Yes	Yes	1	Not indicated	negative
1822	16	Female	alive, living in this HH	alive, living in this HH	form 3	Good	No	No	Yes	1	Not indicated	negative
1823	17	Female	alive, other area	alive, other area	form 3	Good	No	No	Yes	1	Not indicated	negative
1824	13	Female	alive, living in this HH	alive, other country	grade 7	Good	No	No	No	1	Negative	negative
1825	12	Male	alive, living in this HH	alive, living in this HH	grade 6	Excellent	No	No	No	1	Negative	negative
1826	14	Female	alive, living in this HH	alive, living in this HH	form 1	Excellent	No	No	No	1	Not indicated	negative
1827	15	Male	alive, other country	alive, other area	grade 6	Good	No	No	No	1	Negative	negative
1828	17	Female	alive, other country	dead	form 2	Good	No	No	Yes	1	Not indicated	negative
1829	8	Female	alive, living in this HH	alive, living in this HH	grade 2	Good	No	No	No	1	Not indicated	negative
1830	12	Male	alive, living in this HH	alive, other area	grade 6	Poor	No	No	Yes	1	Not indicated	negative
1831	8	Female	alive, living in this HH	alive, living in this HH	grade 3	Excellent	No	No	Yes	1	Negative	negative
1832	10	Male	alive, living in this HH	alive, living in this HH	grade 3	Good	No	Yes	Yes	1	Not indicated	negative
1833	8	Male	dead	dead	grade 2	Fair	No	No	No	1	Not indicated	negative
1834	13	Male	alive, living in this HH	alive, living in this HH	grade 1	Good	No	No	No	1	Negative	negative
1835	16	Male	alive, living in this HH	alive, living in this HH	form 3	Excellent	No	No	No	1	Negative	negative
1836	12	Male	alive, living in this HH	alive, living in this HH	grade 6	Good	No	Yes	No	1	Not indicated	negative
1837	14	Female	alive, other area	dead	grade 7	Excellent	No	No	No	1	Not indicated	negative
1840	13	Male	alive, living in this HH	alive, another HH	form 1	Good	No	No	Yes	1	Not indicated	positive
1841	10	Female	alive, living in this HH	alive, living in this HH	grade 5	Good	No	Yes	Yes	1	Not indicated	negative
1842	8	Male	alive, another HH	alive, other area	grade 1	Good	No	No	No	1	Not indicated	negative
1843	9	Male	alive, living in this HH	alive, living in this HH	grade 3	Good	No	Yes	No	1	Not indicated	negative
1844	10	Female	alive, other country	alive, other area	grade 3	Fair	No	No	Yes	1	Not indicated	negative
1845	13	Female	alive, living in this HH	alive, another HH	grade 7	Fair	No	No	Yes	1	Not indicated	negative
1846	12	Male	alive, other area	alive, other area	grade 4	Good	No	No	Yes	1	Negative	negative
1848	13	Male	alive, living in this HH	alive, another HH	grade 7	Good	No	No	No	1	Negative	negative
1849	16	Male	alive, living in this HH	alive, living in this HH	form 4	Good	No	No	No	1	Not indicated	negative
1850	12	Female	dead	dead	grade 5	Good	No	No	No	1	Not indicated	negative
1851	15	Female	alive, another HH	alive, another HH	form 2	Excellent	No	No	No	1	Not indicated	negative
1852	9	Male	alive, living in this HH	alive, living in this HH	grade 3	Good	No	No	No	1	Not indicated	negative
1853	14	Male	alive, another HH	dead	grade 4	Excellent	No	No	No	1	Negative	negative
1854	17	Female	alive, living in this HH	dead		Good	No	No	No	1	Not indicated	negative
1855	16	Male	dead	alive, living in this HH	grade 7	Good	No	No	No	1	Not indicated	negative
1856	12	Female	alive, living in this HH	alive, living in this HH	grade 7	Good	No	Yes	No	1	Not indicated	negative
1858	9	Female	alive, other country	alive, another HH	grade 4	Good	No	No	No	1	Not indicated	negative
1859	10	Female	alive, living in this HH	alive, living in this HH	grade 4	Good	No	No	No	1	Not indicated	negative
1860	14	Male	alive, another HH	alive, another HH	form 1	Good	No	No	No	1	Not indicated	negative
1861	16	Female	alive, living in this HH	alive, living in this HH	grade 7	Good	No	No	No	1	Not indicated	negative
1862	9	Male	alive, living in this HH	alive, other country	grade 3	Excellent	No	No	Yes	1	Negative	negative
1863	14	Male	alive, living in this HH	dead	form 1	Good	No	Yes	No	1	Negative	negative
1864	8	Female	alive, living in this HH	alive, living in this HH	grade 2	Good	No	No	No	1	Not indicated	negative
1865	9	Female	alive, living in this HH	alive, other country	grade 3	Good	No	No	No	1	Not indicated	negative
1866	15	Female	alive, living in this HH	alive, other country	grade 7	Excellent	No	No	No	1	Not indicated	negative
1867	15	Female	alive, other country	dead	form 1	Excellent	No	No	No	1	Not indicated	negative
1868	16	Female	alive, another HH	dead	form 2	Good	No	No	No	1	Negative	negative
1869	9	Male	alive, other country	dead	grade 4	Good	No	Yes	No	1	Not indicated	negative
1870	9	Male	alive, living in this HH	alive, other country	grade 4	Good	No	No	No	1	Not indicated	negative
1871	8	Male	alive, living in this HH	alive, living in this HH	grade 2	Excellent	No	No	No	1	Not indicated	negative
1872	16	Male	alive, another HH	alive, another HH	grade 7	Good	No	No	No	1	Negative	negative
1873	13	Female	alive, living in this HH	alive, living in this HH	grade 6	Good	No	No	No	1	Not indicated	negative
1874	9	Male	alive, living in this HH	alive, another HH	grade 2	Excellent	No	No	No	1	Not indicated	negative
1875	13	Female	dead	alive, living in this HH	grade 7	Excellent	No	No	No	1	Not indicated	negative
1876	17	Female	alive, other area	alive, other area	grade 2	Good	No	No	No	1	Negative	negative
1877	11	Female	alive, living in this HH	alive, living in this HH	grade 5	Excellent	No	No	No	1	Not indicated	negative
1878	13	Female	alive, living in this HH	dead	grade 6	Good	No	No	No	1	Not indicated	negative
1879	15	Female	alive, living in this HH	alive, living in this HH	grade 7	Good	No	Yes	No	1	Negative	negative
1880	15	Female	alive, living in this HH	alive, living in this HH	grade 7	Good	No	No	No	1	Negative	negative
1881	10	Female	dead	dead	grade 2	Good	No	No	No	1	Positive	positive
1882	8	Male	alive, living in this HH	alive, living in this HH	grade 2	Good	No	Yes	No	1	Negative	negative
1883	8	Male	alive, living in this HH	alive, living in this HH	grade 3	Good	No	No	Yes	1	Not indicated	negative
1884	10	Female	alive, living in this HH	dead	grade 3	Good	No	No	No	1	Not indicated	negative
1885	13	Male	alive, living in this HH	alive, other area	grade 4	Good	No	No	No	1	Not indicated	negative
1886	11	Male	alive, living in this HH	alive, living in this HH	grade 5	Good	No	No	No	1	Negative	negative
1887	10	Female	alive, other area	alive, living in this HH	grade 2	Excellent	No	No	No	1	Not indicated	negative
1888	14	Male	alive, living in this HH	alive, living in this HH	form 2	Excellent	No	No	No	1	Not indicated	negative
1889	11	Female	alive, living in this HH	alive, living in this HH	grade 5	Excellent	No	No	No	1	Not indicated	negative
1890	13	Male	alive, living in this HH	alive, living in this HH	form 2	Good	No	No	No	1	Not indicated	negative
1891	14	Female	alive, living in this HH	alive, living in this HH	form 2	Excellent	No	No	No	1	Negative	negative
1892	11	Male	alive, living in this HH	dead	grade 3	Good	No	No	No	1	Not indicated	negative
1893	17	Female	alive, living in this HH	alive, living in this HH	form 4	Excellent	No	No	No	1	Not indicated	negative
1894	9	Female	alive, living in this HH	dead		Excellent	No	No	No	1	Not indicated	negative
1896	13	Male	alive, living in this HH	alive, other area	form 1	Good	No	No	No	1	Not indicated	negative
1897	17	Male	alive, living in this HH	dead	form 4	Good	No	No	No	1	Negative	negative
1898	13	Male	alive, living in this HH	alive, living in this HH	form 1	Good	No	No	No	1	Not indicated	negative
1899	15	Female	alive, living in this HH	alive, living in this HH	form 3	Good	No	No	No	1	Not indicated	negative
1900	17	Female	alive, living in this HH	alive, living in this HH	form 5	Good	No	No	No	1	Negative	negative
1901	17	Male	alive, living in this HH	alive, living in this HH	form 4	Good	No	No	No	1	Not indicated	negative
1902	17	Male	alive, living in this HH	alive, living in this HH	form 4	Excellent	No	No	No	1	Not indicated	negative
1903	8	Female	alive, living in this HH	alive, living in this HH	grade 2	Good	No	No	No	1	Not indicated	negative
1904	13	Male	alive, living in this HH	alive, other country	form 1	Excellent	No	No	No	1	Not indicated	negative
1905	14	Male	alive, living in this HH	alive, other area	grade 7	Good	No	No	No	1	Not indicated	negative
1906	15	Male	alive, living in this HH	alive, other country	form 1	Excellent	No	No	No	1	Not indicated	negative
1907	10	Female	alive, living in this HH	alive, living in this HH	grade 3	Excellent	No	No	No	1	Not indicated	negative
1908	12	Male	alive, living in this HH	alive, living in this HH	grade 7	Excellent	No	No	No	1	Not indicated	negative
1911	17	Female	alive, living in this HH	alive, other country	form 3	Good	No	No	No	1	Not indicated	negative
1913	14	Male	alive, living in this HH	alive, living in this HH	form 1	Good	No	No	No	1	Not indicated	negative
1914	14	Male	alive, living in this HH	alive, living in this HH	form 1	Good	No	No	No	1	Not indicated	negative
1915	10	Female	alive, living in this HH	alive, living in this HH	grade 3	Good	No	No	No	1	Not indicated	negative
1916	14	Female	alive, living in this HH	alive, living in this HH	form 1	Good	No	No	No	1	Negative	negative
1917	12	Female	dead	dead	grade 4	Good	No	No	No	1	Negative	negative
1918	16	Female	alive, living in this HH	alive, another HH	form 3	Excellent	No	No	No	1	Not indicated	negative
1919	10	Female	alive, living in this HH	alive, living in this HH	grade 4	Good	No	No	No	1	Not indicated	negative
1920	17	Female	dead	alive, other area	form 4	Good	No	No	No	1	Negative	negative
1921	15	Male	alive, living in this HH	dead	form 1	Good	No	No	No	1	Not indicated	negative
1922	12	Male	alive, living in this HH	alive, living in this HH	grade 6	Good	No	No	No	1	Not indicated	negative
1923	11	Male	alive, living in this HH	alive, living in this HH	grade 4	Excellent	No	No	No	1	Not indicated	negative
1924	9	Female	alive, living in this HH	alive, living in this HH	grade 3	Good	No	No	No	1	Not indicated	negative
1925	9	Female	alive, other country	alive, other country	grade 2	Good	No	No	No	1	Not indicated	negative
1926	16	Male	alive, living in this HH	alive, living in this HH	form 4	Good	No	Yes	No	1	Not indicated	negative
1927	11	Female	alive, living in this HH	alive, living in this HH	grade 6	Excellent	No	No	No	1	Not indicated	negative
1928	14	Female	dead	dead	form 2	Excellent	No	Yes	No	1	Not indicated	negative
1929	13	Female	alive, living in this HH	alive, living in this HH	form 1	Excellent	No	No	No	1	Not indicated	negative
1930	9	Female	alive, living in this HH	alive, living in this HH	grade 3	Good	No	No	No	1	Not indicated	negative
1931	13	Female	alive, living in this HH	alive, living in this HH	grade 7	Good	No	No	No	1	Not indicated	negative
1932	10	Male	alive, other area	alive, other area	grade 5	Fair	No	No	No	1	Not indicated	negative
1933	9	Male	alive, other area	alive, other area	grade 4	Excellent	No	No	No	1	Not indicated	negative
1934	10	Male	alive, living in this HH	alive, living in this HH	grade 4	Fair	No	No	No	1	Not indicated	negative
1935	17	Male	alive, other area	alive, living in this HH	form 4	Excellent	No	No	No	1	Negative	negative
1936	14	Female	alive, living in this HH	alive, living in this HH	form 2	Excellent	No	No	No	1	Not indicated	negative
1937	12	Male	alive, living in this HH	dead	grade 6	Excellent	No	No	No	1	Not indicated	negative
1938	15	Male	alive, living in this HH	dead	grade 7	Excellent	No	Yes	Yes	1	Negative	negative
1939	14	Male	alive, living in this HH	alive, living in this HH	grade 6	Good	No	No	No	1	Not indicated	negative
1940	11	Female	alive, living in this HH	alive, living in this HH	grade 5	Good	No	No	No	1	Not indicated	negative
1942	8	Male	alive, another HH	alive, another HH	grade 2	Good	No	No	No	1	Negative	negative
1943	15	Female	dead	dead	grade 7	Good	No	No	No	1	Not indicated	negative
1945	8	Female	alive, other area	alive, living in this HH	grade 3	Excellent	No	No	No	1	Not indicated	negative
1946	16	Female	alive, other area	alive, living in this HH	grade 7	Excellent	No	No	No	1	Not indicated	negative
1947	9	Male	alive, living in this HH	alive, living in this HH	grade 2	Excellent	No	No	No	1	Not indicated	negative
1948	17	Male	alive, living in this HH	dead	form 3	Excellent	No	No	No	1	Not indicated	negative
1949	13	Female	dead	alive, another HH	grade 7	Good	No	No	No	1	Not indicated	negative
1950	11	Male	alive, living in this HH	alive, other country	grade 2	Excellent	No	No	No	1	Not indicated	negative
1951	8	Female	alive, other area	alive, other area	grade 2	Excellent	No	No	No	1	Not indicated	negative
1952	11	Female	alive, other area	alive, other area	grade 6	Excellent	No	No	No	1	Not indicated	negative
1953	11	Male	alive, other area	alive, other area	grade 4	Excellent	No	No	No	1	Not indicated	negative
1954	16	Female	alive, living in this HH	alive, living in this HH	form 3	Excellent	No	No	No	1	Not indicated	negative
1955	14	Male	alive, other area	alive, other area	form 1	Excellent	No	No	No	1	Not indicated	negative
1956	10	Male	alive, living in this HH	alive, living in this HH	grade 4	Excellent	No	No	No	1	Not indicated	negative
1957	11	Female	alive, living in this HH	alive, living in this HH	grade 6	Excellent	No	No	No	1	Not indicated	negative
1958	15	Female	alive, living in this HH	alive, living in this HH	form 3	Excellent	No	No	No	1	Not indicated	negative
1959	17	Female	alive, living in this HH	alive, living in this HH	form 4	Excellent	No	No	No	1	Not indicated	negative
1960	8	Male	alive, living in this HH	alive, living in this HH	grade 3	Good	No	No	No	1	Not indicated	negative
1962	10	Female	alive, living in this HH	alive, living in this HH	grade 4	Good	No	No	No	1	Not indicated	negative
1963	12	Male	alive, other area	alive, living in this HH	grade 7	Good	No	No	No	1	Not indicated	negative
1964	10	Male	alive, living in this HH	alive, living in this HH	grade 3	Good	No	No	No	1	Not indicated	negative
1965	8	Male	alive, living in this HH	alive, living in this HH	grade 2	Good	No	No	No	1	Not indicated	negative
1966	16	Female	dead	alive, other area	form 3	Good	No	Yes	No	1	Not indicated	negative
1968	17	Male	alive, other area	alive, other area	form 4	Excellent	No	No	No	1	Not indicated	negative
1969	9	Male	alive, living in this HH	alive, living in this HH	grade 4	Good	No	No	No	1	Not indicated	negative
1970	14	Female	alive, living in this HH	alive, living in this HH	form 2	Good	No	No	No	1	Negative	negative
1971	8	Male	alive, living in this HH	alive, living in this HH	grade 2	Good	No	No	No	1	Not indicated	negative
1972	8	Male	alive, living in this HH	alive, living in this HH	grade 2	Good	No	No	No	1	Not indicated	negative
1973	13	Female	alive, living in this HH	alive, living in this HH	grade 7	Good	No	No	No	1	Not indicated	negative
1974	16	Male	alive, living in this HH	alive, living in this HH	form 3	Excellent	No	No	No	1	Not indicated	negative
1975	15	Male	alive, other area	alive, living in this HH	form 2	Good	No	Yes	No	1	Not indicated	negative
1976	14	Female	dead	don't know	grade 7	Good	No	No	No	1	Positive	positive
1978	9	Female	alive, living in this HH	alive, living in this HH	grade 4	Good	No	No	No	1	Not indicated	negative
1979	14	Female	alive, living in this HH	alive, living in this HH	form 2	Good	No	No	No	1	Not indicated	negative
2483	16	Male	alive, living in this HH	dead	form 3	Excellent	No	No	No	1	Not indicated	negative
2484	16	Male	alive, living in this HH	alive, living in this HH	form 3	Good	No	No	No	1	Not indicated	negative
2485	14	Female	alive, living in this HH	alive, living in this HH	form 1	Excellent	No	No	No	1	Not indicated	negative
2486	14	Female	alive, living in this HH	alive, living in this HH	grade 7	Excellent	No	No	No	1	Not indicated	negative
2487	11	Male	alive, another HH	dead	grade 4	Good	No	No	No	1	Not indicated	negative
2489	10	Female	alive, living in this HH	alive, another HH	grade 3	Excellent	No	No	No	1	Not indicated	negative
2490	15	Female	alive, another HH	alive, another HH	grade 6	Excellent	No	No	No	1	Not indicated	negative
2493	16	Male	alive, living in this HH	alive, living in this HH	form 3	Excellent	No	No	No	1	Not indicated	negative
2497	14	Female	alive, living in this HH	alive, living in this HH	form 1	Excellent	No	No	No	1	Not indicated	negative
2498	13	Female	alive, living in this HH	alive, another HH	grade 6	Excellent	No	No	No	1	Not indicated	negative
2502	10	Male	alive, living in this HH	dead	grade 4	Fair	No	No	No	1	Not indicated	negative
2504	12	Female	dead	dead	grade 6	Excellent	No	No	No	1	Not indicated	negative
2507	12	Female	alive, living in this HH	alive, living in this HH	grade 6	Good	No	No	No	1	Not indicated	negative
2509	14	Female	alive, living in this HH	alive, other area	grade 5	Good	No	No	No	1	Negative	negative
2510	13	Female	alive, living in this HH	dead	grade 5	Good	No	No	No	1	Negative	negative
2511	13	Female	alive, living in this HH	alive, living in this HH	form 1	Good	No	Yes	No	1	Not indicated	negative
2512	13	Male	alive, living in this HH	alive, living in this HH	grade 4	Fair	No	No	No	1	Not indicated	negative
2513	10	Male	alive, living in this HH	alive, living in this HH	grade 2	Good	No	No	No	1	Not indicated	negative
2514	9	Male	alive, living in this HH	dead	grade 2	Good	No	Yes	No	1	Negative	negative
2515	14	Female	alive, living in this HH	alive, living in this HH	grade 7	Excellent	No	Yes	No	1	Negative	negative
2516	10	Male	alive, living in this HH	dead	grade 3	Good	No	No	No	1	Not indicated	negative
2517	12	Female	alive, living in this HH	alive, living in this HH	grade 5	Excellent	No	No	No	1	Not indicated	negative
2520	15	Male	alive, living in this HH	alive, living in this HH	form 1	Excellent	No	Yes	No	1	Not indicated	negative
2526	17	Female	alive, living in this HH	alive, living in this HH	form 3	Excellent	No	No	No	1	Not indicated	negative
2528	10	Female	alive, living in this HH	alive, living in this HH	grade 4	Good	No	No	No	1	Not indicated	negative
2531	17	Female	alive, living in this HH	alive, another HH	form 4	Fair	No	No	Yes	1	Negative	negative
2532	9	Female	alive, another HH	alive, another HH	grade 3	Fair	No	No	No	1	Not indicated	negative
2533	10	Female	alive, living in this HH	dead	grade 5	Good	No	No	Yes	1	Not indicated	negative
2534	15	Male	alive, another HH	alive, living in this HH	grade 7	Good	No	No	No	1	Not indicated	negative
2535	14	Male	alive, living in this HH	alive, another HH	grade 7	Good	No	No	No	1	Negative	negative
2536	12	Male	alive, living in this HH	dead	grade 4	Excellent	No	No	No	1	Not indicated	negative
2537	11	Male	alive, living in this HH	alive, living in this HH	grade 3	Fair	No	No	No	1	Not indicated	negative
2538	11	Female	alive, living in this HH	alive, another HH	grade 6	Excellent	No	No	No	1	Not indicated	negative
2539	15	Male	alive, living in this HH	alive, living in this HH	form 2	Fair	No	No	No	1	Not indicated	negative
2540	10	Female	alive, other country	alive, other country	grade 4	Good	No	No	No	1	Not indicated	negative
2542	8	Male	alive, other country	alive, other country	grade 3	Good	No	No	No	1	Not indicated	negative
2543	14	Male	alive, living in this HH	alive, living in this HH	form 1	Good	No	No	No	1	Not indicated	negative
2546	10	Female	alive, living in this HH	alive, another HH	grade 1	Good	No	No	No	1	Negative	negative
2547	13	Female	alive, another HH	alive, another HH	grade 7	Good	No	No	No	1	Not indicated	negative
2549	8	Female	alive, living in this HH	alive, living in this HH	grade 1	Good	No	No	No	1	Not indicated	negative
2550	13	Female	dead	dead	grade 7	Good	Yes	Yes	No	1	Positive	positive
2551	8	Female	alive, another HH	alive, another HH	grade 3	Good	No	No	No	1	Not indicated	negative
2552	16	Male	alive, another HH	alive, another HH	form 3	Good	No	No	Yes	1	Not indicated	negative
2553	14	Female	alive, living in this HH	alive, living in this HH	form 2	Good	No	No	No	1	Not indicated	negative
2554	8	Female	alive, other area	alive, other area	grade 3	Excellent	No	No	No	1	Not indicated	negative
2556	15	Female	alive, other area	alive, other area	form 2	Excellent	No	No	No	1	Not indicated	negative
2557	15	Female	alive, living in this HH	alive, other area	form 1	Good	No	No	No	1	Not indicated	negative
2558	14	Male	alive, other area	alive, other area	form 1	Excellent	No	No	No	1	Not indicated	negative
2559	14	Male	alive, other country	dead	form 1	Excellent	No	No	No	1	Not indicated	negative
2560	11	Female	alive, other country	alive, other country	grade 5	Excellent	No	No	No	1	Not indicated	negative
2561	10	Male	alive, other country	dead	grade 4	Excellent	No	No	No	1	Not indicated	negative
2562	10	Female	alive, living in this HH	alive, other country	grade 4	Excellent	No	No	No	1	Not indicated	negative
2563	10	Female	dead	dead	grade 3	Excellent	No	No	No	1	Not indicated	negative
2564	8	Female	alive, living in this HH	alive, other area	grade 1	Good	No	No	No	1	Not indicated	negative
2565	11	Female	alive, other area	alive, other area	grade 5	Excellent	No	No	No	1	Not indicated	negative
2566	16	Male	alive, other area	alive, other area	form 3	Excellent	No	No	No	1	Not indicated	negative
2567	11	Female	alive, living in this HH	alive, living in this HH	grade 6	Good	No	No	Yes	1	Not indicated	negative
2568	15	Female	alive, living in this HH	alive, other area	form 1	Good	No	No	No	1	Not indicated	negative
2569	10	Female	alive, living in this HH	alive, living in this HH	grade 5	Good	No	No	No	1	Not indicated	negative
2570	10	Male	alive, living in this HH	alive, living in this HH	grade 3	Excellent	No	No	No	1	Not indicated	negative
2571	11	Female	alive, living in this HH	dead	grade 5	Fair	No	No	No	1	Negative	negative
2572	8	Female	alive, living in this HH	alive, living in this HH	grade 3	Excellent	No	No	No	1	Not indicated	negative
2573	11	Female	alive, living in this HH	alive, living in this HH	grade 5	Excellent	No	No	No	1	Not indicated	negative
2574	15	Female	alive, living in this HH	alive, living in this HH	form 2	Excellent	No	No	No	1	Not indicated	negative
2575	17	Female	alive, other area	alive, other area	form 1	Good	No	No	No	1	Not indicated	negative
2576	8	Male	alive, living in this HH	alive, living in this HH	grade 2	Good	No	No	No	1	Negative	negative
2577	8	Male	alive, living in this HH	alive, living in this HH	grade 3	Fair	No	No	No	1	Not indicated	negative
2578	17	Male	alive, living in this HH	alive, living in this HH	form 3	Excellent	No	No	No	1	Not indicated	negative
2579	14	Female	alive, living in this HH	alive, living in this HH	form 2	Excellent	No	No	No	1	Not indicated	negative
2580	17	Male	alive, another HH	alive, another HH	form 4	Excellent	No	No	No	1	Not indicated	negative
2581	16	Female	dead	dead	grade 7	Good	No	No	No	1	Negative	positive
2582	9	Female	alive, living in this HH	alive, living in this HH	grade 4	Good	No	No	No	1	Not indicated	negative
2583	9	Female	alive, living in this HH	alive, another HH	grade 1	Good	No	No	No	1	Not indicated	negative
2584	16	Male	alive, living in this HH	alive, living in this HH	form 3	Excellent	No	No	No	1	Not indicated	negative
2585	9	Male	alive, living in this HH	alive, living in this HH	grade 3	Good	No	Yes	No	1	Not indicated	negative
2586	17	Female	alive, another HH	alive, another HH	form 3	Good	No	No	No	1	Negative	negative
2587	9	Male	alive, living in this HH	alive, living in this HH	grade 2	Good	No	No	No	1	Not indicated	negative
2588	14	Male	alive, living in this HH	alive, living in this HH	form 1	Good	No	No	No	1	Not indicated	negative
2589	8	Female	alive, another HH	alive, another HH	grade 2	Good	No	No	No	1	Not indicated	negative
2590	10	Female	alive, another HH	alive, another HH	grade 3	Good	No	No	No	1	Not indicated	negative
2591	17	Female	alive, living in this HH	alive, living in this HH	form 4	Excellent	No	No	No	1	Not indicated	negative
2592	17	Female	dead	alive, another HH	form 3	Excellent	No	No	No	1	Not indicated	negative
2593	9	Female	alive, living in this HH	alive, living in this HH	grade 4	Good	No	No	No	1	Not indicated	negative
2594	9	Female	alive, living in this HH	alive, living in this HH	grade 4	Good	No	No	No	1	Not indicated	negative
2595	11	Male	dead	dead	grade 4	Good	No	No	No	1	Not indicated	negative
2596	9	Male	alive, living in this HH	alive, living in this HH	grade 4	Excellent	No	No	No	1	Negative	negative
2597	9	Male	alive, living in this HH	alive, living in this HH	grade 4	Good	No	No	No	1	Not indicated	negative
2598	10	Male	alive, living in this HH	alive, living in this HH	grade 4	Good	No	No	No	1	Not indicated	negative
2599	17	Female	alive, living in this HH	dead	form 4	Excellent	No	No	No	1	Not indicated	negative
2600	13	Male	alive, living in this HH	alive, other area	grade 7	Good	No	No	No	1	Negative	negative
2601	17	Female	alive, other area	dead		Good	No	No	No	1	Negative	negative
2602	10	Female	alive, living in this HH	alive, living in this HH	grade 5	Good	No	No	No	1	Not indicated	negative
2603	15	Male	alive, living in this HH	alive, living in this HH	form 1	Good	No	No	No	1	Not indicated	negative
2604	13	Female	alive, other country	alive, other area	grade 6	Good	No	No	No	1	Not indicated	negative
2605	13	Female	alive, another HH	dead	grade 6	Excellent	No	No	No	1	Not indicated	negative
2606	15	Male	alive, living in this HH	dead	form 1	Good	No	No	No	1	Not indicated	negative
2607	15	Male	alive, living in this HH	alive, living in this HH	form 3	Good	No	No	No	1	Negative	negative
2608	16	Male	alive, living in this HH	alive, another HH	form 4	Fair	No	No	No	1	Not indicated	negative
2610	8	Male	alive, living in this HH	alive, living in this HH	grade 2	Good	No	No	No	1	Not indicated	negative
2611	17	Male	alive, living in this HH	dead	form 4	Excellent	No	No	No	1	Not indicated	negative
2612	14	Male	alive, other country	alive, another HH	grade 4	Good	No	No	No	1	Not indicated	negative
2614	14	Female	alive, living in this HH	alive, living in this HH	form 3	Fair	No	No	Yes	1	Not indicated	negative
2616	13	Male	alive, living in this HH	alive, living in this HH	form 1	Excellent	No	No	No	1	Not indicated	negative
2617	16	Female	alive, other area	alive, other area	form 3	Good	No	No	No	1	Not indicated	negative
2618	11	Female	alive, living in this HH	alive, living in this HH	grade 6	Fair	No	No	No	1	Negative	negative
2619	9	Female	alive, other area	alive, other area	grade 2	Good	No	No	No	1	Not indicated	negative
2620	8	Female	alive, living in this HH	alive, living in this HH	grade 3	Good	No	No	No	1	Not indicated	negative
2621	8	Female	alive, living in this HH	alive, other area	grade 3	Excellent	No	No	No	1	Not indicated	negative
2622	17	Female	alive, other area	alive, other area	form 4	Good	No	No	No	1	Negative	negative
2623	13	Female	alive, living in this HH	alive, living in this HH	form 1	Good	No	No	No	1	Not indicated	negative
2624	15	Female	alive, living in this HH	alive, living in this HH	grade 7	Good	No	No	No	1	Not indicated	negative
2625	9	Male	alive, living in this HH	alive, living in this HH	grade 3	Good	No	No	No	1	Not indicated	negative
2626	9	Female	alive, living in this HH	alive, living in this HH	grade 4	Good	No	No	No	1	Not indicated	negative
2627	9	Male	alive, living in this HH	alive, living in this HH	grade 2	Good	No	No	No	1	Not indicated	negative
2628	14	Male	alive, living in this HH	alive, living in this HH	form 2	Good	No	No	No	1	Not indicated	negative
2629	16	Female	alive, living in this HH	alive, living in this HH	grade 7	Good	No	No	No	1	Not indicated	negative
2630	12	Male	alive, living in this HH	alive, living in this HH	grade 7	Good	No	No	No	1	Not indicated	negative
2631	12	Male	alive, other area	alive, other area	grade 4	Good	No	Yes	No	1	Not indicated	negative
2632	14	Male	alive, living in this HH	alive, living in this HH	form 1	Good	No	No	No	1	Negative	negative
2633	14	Male	alive, living in this HH	alive, living in this HH	form 3	Good	No	No	No	1	Not indicated	negative
2634	12	Male	alive, living in this HH	alive, living in this HH	grade 4	Good	No	No	No	1	Not indicated	negative
2635	9	Male	alive, living in this HH	alive, living in this HH	grade 4	Excellent	No	No	No	1	Not indicated	negative
2636	8	Male	alive, living in this HH	alive, living in this HH	grade 3	Good	No	No	No	1	Not indicated	negative
2638	16	Female	alive, living in this HH	dead	form 4	Excellent	No	No	No	1	Negative	negative
2639	16	Male	alive, living in this HH	dead	form 1	Poor	Yes	No	Yes	1	Positive	negative
2640	16	Male	alive, living in this HH	alive, living in this HH	form 4	Good	No	No	No	1	Not indicated	negative
2641	16	Female	alive, living in this HH	dead	form 4	Excellent	No	No	No	1	Negative	negative
2645	9	Female	alive, living in this HH	alive, living in this HH	grade 4	Good	No	No	Yes	1	Not indicated	negative
2646	14	Female	dead	alive, other area	grade 7	Good	No	No	No	1	Not indicated	negative
2647	8	Female	alive, other area	alive, other area	grade 4	Good	No	No	No	1	Not indicated	negative
2650	8	Female	alive, living in this HH	dead	grade 2	Good	No	No	No	1	Not indicated	negative
2652	10	Female	alive, living in this HH	alive, living in this HH	grade 4	Good	No	No	No	1	Negative	negative
2653	10	Female	alive, living in this HH	alive, other area	grade 3	Good	No	No	No	1	Not indicated	negative
2654	12	Female	alive, living in this HH	alive, living in this HH	grade 6	Good	No	No	No	1	Not indicated	negative
2655	12	Male	alive, living in this HH	alive, living in this HH	grade 6	Good	No	No	No	1	Not indicated	negative
2656	10	Female	alive, living in this HH	alive, living in this HH	grade 4	Good	No	No	No	1	Not indicated	negative
2659	9	Male	alive, living in this HH	alive, living in this HH	grade 2	Good	No	No	No	1	Not indicated	negative
2661	17	Male	alive, living in this HH	alive, living in this HH	form 3	Good	No	No	No	1	Negative	negative
2666	8	Male	alive, living in this HH	alive, living in this HH	grade 3	Good	No	No	No	1	Not indicated	negative
2668	10	Male	alive, living in this HH	alive, living in this HH	grade 5	Good	No	No	No	1	Negative	negative
2669	16	Male	alive, living in this HH	dead	form 3	Excellent	No	Yes	No	1	Negative	negative
2670	8	Male	alive, another HH	alive, another HH	grade 1	Excellent	No	No	No	1	Not indicated	negative
2671	13	Male	alive, another HH	alive, other area	grade 5	Excellent	No	No	No	1	Not indicated	negative
2672	13	Female	alive, living in this HH	alive, living in this HH	grade 4	Excellent	No	No	No	1	Not indicated	negative
2673	15	Female	alive, another HH	alive, another HH	form 2	Excellent	No	No	No	1	Not indicated	negative
2674	17	Male	dead	dead	form 1	Good	No	No	No	1	Negative	negative
2675	15	Male	alive, living in this HH	alive, living in this HH	grade 6	Good	No	No	No	1	Negative	negative
2676	16	Female	alive, living in this HH	alive, other area	form 2	Good	No	No	No	1	Not indicated	negative
2677	17	Male	alive, living in this HH	alive, living in this HH	form 1	Good	No	Yes	No	1	Negative	negative
2679	9	Female	alive, another HH	alive, living in this HH	grade 2	Excellent	No	No	No	1	Not indicated	negative
2680	12	Male	alive, other area	alive, living in this HH	grade 5	Excellent	No	No	No	1	Not indicated	negative
2681	9	Male	alive, living in this HH	alive, other area	grade 2	Excellent	No	No	No	1	Not indicated	negative
2682	8	Female	alive, living in this HH	alive, other area	grade 1	Excellent	No	No	No	1	Not indicated	negative
2683	9	Male	alive, another HH	alive, living in this HH	0	Good	No	No	No	1	Not indicated	negative
2684	13	Male	alive, another HH	alive, other country	grade 7	Good	No	No	No	1	Negative	negative
2685	8	Male	alive, another HH	alive, other country	grade 2	Excellent	No	Yes	No	1	Not indicated	negative
2686	13	Male	alive, living in this HH	alive, living in this HH	grade 5	Excellent	No	No	Yes	1	Negative	positive
2687	15	Male	alive, living in this HH	dead	grade 7	Good	No	No	No	1	Negative	negative
2688	10	Female	alive, living in this HH	alive, living in this HH	grade 4	Excellent	No	No	No	1	Not indicated	negative
2689	11	Male	alive, living in this HH	alive, living in this HH	grade 2	Good	No	No	No	1	Not indicated	negative
2690	11	Female	alive, living in this HH	alive, living in this HH	0	Excellent	No	No	No	1	Not indicated	negative
2692	15	Female	alive, another HH	alive, another HH	grade 7	Excellent	No	No	No	1	Not indicated	negative
2694	16	Male	dead	dead	form 1	Excellent	No	No	No	1	Negative	negative
2695	14	Male	alive, living in this HH	alive, another HH	grade 7	Excellent	No	No	No	1	Negative	negative
2696	8	Female	alive, living in this HH	alive, living in this HH	grade 1	Excellent	No	No	No	1	Not indicated	negative
2698	17	Male	dead	dead	grade 7	Excellent	No	No	No	1	Negative	negative
2699	12	Male	alive, living in this HH	alive, another HH	grade 6	Excellent	No	No	No	1	Not indicated	negative
2701	8	Female	alive, living in this HH	alive, living in this HH	0	Good	No	No	No	1	Not indicated	negative
2702	16	Male	alive, living in this HH	alive, living in this HH	form 2	Good	No	No	No	1	Not indicated	negative
2703	17	Male	alive, other country	dead	form 3	Good	No	No	No	1	Negative	negative
2706	15	Female	dead	dead	form 2	Good	No	No	No	1	Not indicated	negative
2709	15	Female	alive, living in this HH	alive, living in this HH	grade 7	Fair	No	No	No	1	Not indicated	negative
2710	12	Male	alive, living in this HH	alive, living in this HH	grade 5	Excellent	No	No	No	1	Not indicated	negative
2711	16	Female	alive, living in this HH	alive, other area	grade 7	Excellent	No	No	No	1	Not indicated	negative
2714	16	Male	alive, living in this HH	alive, other country	form 1	Excellent	No	No	No	1	Not indicated	negative
2715	17	Male	alive, living in this HH	alive, another HH	form 2	Good	No	No	No	1	Not indicated	negative
2716	8	Male	alive, living in this HH	alive, living in this HH	grade 2	Good	No	Yes	No	1	Not indicated	negative
2717	17	Male	alive, living in this HH	alive, another HH	form 1	Good	No	No	No	1	Not indicated	negative
2718	16	Male	alive, living in this HH	alive, living in this HH	form 4	Good	No	No	No	1	Not indicated	negative
2719	17	Male	alive, living in this HH	alive, living in this HH	form 4	Good	No	No	No	1	Not indicated	negative
2720	10	Male	alive, living in this HH	alive, living in this HH	grade 4	Good	No	No	No	1	Not indicated	negative
2721	12	Male	alive, living in this HH	alive, living in this HH	grade 6	Good	No	No	No	1	Not indicated	negative
2722	8	Male	alive, living in this HH	alive, living in this HH	grade 1	Good	No	No	No	1	Not indicated	negative
2723	15	Female	alive, living in this HH	alive, living in this HH	form 1	Good	No	No	No	1	Not indicated	negative
2724	17	Male	alive, other country	alive, other area	form 4	Good	No	No	No	1	Not indicated	negative
2725	13	Female	alive, living in this HH	alive, living in this HH	grade 7	Good	No	No	No	1	Not indicated	negative
2726	17	Male	alive, other area	dead	form 1	Good	No	No	No	1	Not indicated	negative
2727	10	Male	alive, living in this HH	alive, living in this HH	grade 5	Good	No	No	No	1	Not indicated	negative
2728	15	Male	alive, living in this HH	dead	form 2	Good	No	No	No	1	Not indicated	negative
2729	13	Male	alive, living in this HH	dead	grade 7	Good	No	No	No	1	Not indicated	negative
2730	17	Male	alive, living in this HH	alive, another HH		Excellent	No	No	No	1	Not indicated	negative
2731	11	Female	alive, living in this HH	alive, living in this HH	grade 5	Good	No	No	No	1	Not indicated	negative
2732	9	Male	alive, living in this HH	alive, living in this HH	grade 3	Good	No	No	No	1	Negative	negative
2733	17	Male	alive, other area	alive, other area	form 4	Good	No	No	No	1	Not indicated	negative
2735	8	Female	alive, living in this HH	alive, another HH	grade 1	Good	No	No	No	1	Not indicated	negative
2737	11	Female	alive, living in this HH	alive, living in this HH	grade 6	Good	No	No	No	1	Not indicated	negative
2738	13	Female	alive, living in this HH	alive, another HH	grade 6	Good	No	No	No	1	Not indicated	negative
2739	16	Male	alive, living in this HH	alive, another HH	form 1	Good	No	No	No	1	Negative	negative
2741	11	Female	alive, living in this HH	alive, another HH	grade 5	Good	No	No	No	1	Not indicated	negative
2745	11	Female	alive, living in this HH	alive, another HH	grade 6	Good	No	No	No	1	Not indicated	negative
2746	16	Female	alive, living in this HH	alive, living in this HH	form 3	Good	No	No	No	1	Not indicated	negative
2761	12	Male	alive, living in this HH	alive, living in this HH	grade 5	Good	No	No	No	6	Not indicated	negative
2762	9	Female	alive, living in this HH	alive, living in this HH	grade 4	Good	No	Yes	No	6	Not indicated	negative
2763	16	Female	alive, other country	alive, other area	form 3	Excellent	Yes	No	No	6	Not indicated	negative
2764	8	Female	alive, other country	alive, other area	grade 1	Good	No	No	No	6	Not indicated	negative
2765	15	Female	alive, living in this HH	alive, other area	form 2	Good	No	No	No	6	Not indicated	negative
2766	12	Male	alive, living in this HH	alive, another HH	grade 6	Good	No	No	No	6	Not indicated	negative
2767	9	Male	alive, other country	alive, other country	grade 3	Good	No	No	No	6	Not indicated	negative
2768	13	Female	alive, living in this HH	alive, living in this HH	form 1	Good	No	No	No	6	Not indicated	negative
2769	15	Female	alive, another HH	alive, another HH	form 2	Good	No	No	No	6	Not indicated	negative
2770	17	Male	alive, living in this HH	dead	form 4	Excellent	No	No	No	6	Not indicated	negative
2771	8	Female	alive, living in this HH	alive, living in this HH	grade 2	Excellent	No	No	No	6	Not indicated	negative
2772	12	Female	alive, living in this HH	alive, living in this HH	grade 6	Good	No	No	No	6	Not indicated	negative
2773	10	Female	alive, living in this HH	alive, living in this HH	grade 4	Good	No	No	No	6	Not indicated	negative
2774	17	Female	alive, other area	alive, another HH	form 4	Good	No	No	No	6	Not indicated	negative
2775	14	Female	alive, other area	alive, other area	grade 5	Good	No	No	No	6	Not indicated	negative
2776	9	Male	alive, living in this HH	alive, living in this HH	grade 3	Good	No	No	No	6	Not indicated	negative
2777	17	Female	dead	dead	form 3	Good	No	No	No	6	Negative	negative
2778	16	Female	alive, living in this HH	alive, living in this HH	form 3	Good	No	No	No	6	Not indicated	negative
2779	17	Female	alive, living in this HH	alive, living in this HH	form 3	Fair	No	No	Yes	6	Not indicated	negative
2780	16	Male	alive, other area	alive, living in this HH	form 3	Excellent	No	No	No	6	Negative	negative
2781	16	Female	alive, other area	alive, other area	form 2	Good	No	No	No	6	Not indicated	negative
2782	14	Female	alive, living in this HH	alive, living in this HH	form 1	Excellent	No	No	Yes	6	Negative	negative
2783	15	Female	alive, living in this HH	alive, other country	form 3	Excellent	No	No	No	6	Not indicated	negative
2784	9	Male	alive, living in this HH	alive, living in this HH	grade 3	Good	No	No	No	6	Not indicated	negative
2785	14	Female	dead	alive, another HH	grade 7	Good	No	No	No	6	Not indicated	negative
2788	12	Female	alive, living in this HH	alive, living in this HH	grade 6	Excellent	No	No	No	6	Negative	negative
2789	16	Female	alive, other area	dead	form 2	Excellent	No	No	No	6	Not indicated	negative
2790	9	Male	alive, living in this HH	alive, living in this HH	grade 3	Good	No	No	No	6	Not indicated	negative
2791	16	Female	alive, living in this HH	alive, living in this HH	form 2	Good	No	No	No	6	Not indicated	negative
2792	15	Female	alive, living in this HH	alive, living in this HH	form 2	Excellent	No	No	No	6	Not indicated	negative
2793	11	Male	alive, living in this HH	alive, living in this HH	grade 4	Fair	No	Yes	No	6	Not indicated	negative
2794	10	Female	alive, living in this HH	alive, living in this HH	grade 4	Excellent	No	No	No	6	Not indicated	negative
2795	16	Male	alive, living in this HH	dead	form 5	Excellent	No	No	No	6	Negative	negative
2796	10	Female	alive, living in this HH	alive, living in this HH	grade 3	Excellent	No	No	No	6	Not indicated	negative
2798	9	Female	alive, living in this HH	alive, living in this HH	grade 3	Good	No	No	No	6	Not indicated	negative
2800	12	Male	alive, living in this HH	alive, living in this HH	grade 3	Fair	No	No	No	6	Not indicated	negative
2805	10	Male	alive, living in this HH	alive, living in this HH	grade 4	Excellent	No	No	No	6	Not indicated	negative
2807	12	Male	alive, living in this HH	alive, other area	grade 6	Excellent	No	No	No	6	Negative	negative
2808	16	Male	alive, living in this HH	alive, other area	form 1	Good	No	Yes	No	6	Not indicated	negative
2809	11	Female	alive, living in this HH	alive, living in this HH	grade 5	Good	No	No	No	6	Not indicated	negative
2810	16	Female	alive, other area	alive, living in this HH	form 2	Fair	No	Yes	Yes	6	Not indicated	positive
2811	14	Male	alive, living in this HH	alive, living in this HH	form 1	Excellent	No	No	No	6	Not indicated	negative
2815	9	Female	alive, living in this HH	alive, living in this HH	grade 3	Good	No	No	No	6	Not indicated	negative
2816	14	Female	alive, living in this HH	alive, living in this HH	grade 7	Good	No	No	No	6	Not indicated	negative
2819	14	Female	alive, living in this HH	alive, other area	form 1	Excellent	No	No	No	6	Negative	negative
2820	10	Male	alive, other country	alive, other country	grade 4	Good	No	No	No	6	Not indicated	negative
2821	9	Female	alive, living in this HH	alive, living in this HH	grade 3	Good	No	No	No	6	Not indicated	negative
2822	16	Female	alive, other area	dead	form 1	Good	No	No	Yes	6	Negative	negative
2823	9	Female	alive, living in this HH	alive, living in this HH	grade 3	Good	No	No	No	6	Not indicated	negative
2825	11	Male	alive, living in this HH	alive, other country	grade 5	Good	No	No	No	6	Not indicated	negative
2826	16	Male	alive, living in this HH	alive, living in this HH	form 2	Good	No	No	No	6	Negative	negative
2828	8	Male	alive, living in this HH	alive, living in this HH	grade 2	Good	No	No	No	6	Not indicated	negative
2831	12	Male	alive, another HH	alive, another HH	grade 5	Fair	No	No	No	6	Not indicated	negative
2833	9	Male	alive, living in this HH	alive, living in this HH	grade 4	Excellent	No	No	No	6	Not indicated	negative
2834	17	Female	alive, living in this HH	alive, living in this HH	form 5	Excellent	No	No	No	6	Negative	negative
2835	10	Female	alive, living in this HH	alive, living in this HH	grade 5	Good	No	No	No	6	Not indicated	negative
2836	16	Male	alive, living in this HH	alive, living in this HH	form 3	Excellent	No	No	No	6	Negative	negative
2837	16	Female	alive, living in this HH	alive, living in this HH	form 2	Good	No	No	No	6	Not indicated	negative
2840	14	Female	alive, living in this HH	alive, living in this HH	form 2	Good	No	No	No	6	Negative	negative
2841	11	Female	alive, other area	alive, living in this HH	grade 6	Fair	No	No	No	6	Not indicated	negative
2844	10	Female	alive, living in this HH	alive, living in this HH	grade 5	Excellent	No	No	No	6	Not indicated	negative
2845	14	Female	alive, other area	alive, living in this HH	grade 7	Good	No	No	No	6	Not indicated	negative
2847	8	Male	alive, living in this HH	alive, living in this HH	grade 3	Good	No	Yes	No	6	Not indicated	negative
2849	8	Female	alive, living in this HH	alive, living in this HH	grade 4	Good	No	No	No	6	Negative	negative
2850	8	Male	alive, living in this HH	alive, living in this HH	grade 3	Good	No	No	No	6	Not indicated	negative
2851	11	Female	alive, living in this HH	alive, other area	grade 6	Good	No	No	No	6	Not indicated	negative
2852	17	Female	alive, living in this HH	alive, living in this HH	form 3	Excellent	No	No	No	6	Not indicated	negative
2853	17	Female	alive, living in this HH	alive, living in this HH	form 4	Good	No	No	No	6	Negative	negative
2854	14	Female	alive, living in this HH	alive, living in this HH	form 1	Excellent	No	No	No	6	Not indicated	negative
2855	9	Male	alive, living in this HH	alive, living in this HH	grade 3	Excellent	No	No	No	6	Not indicated	negative
2856	9	Female	alive, living in this HH	alive, living in this HH	grade 3	Good	No	No	No	6	Negative	negative
2857	13	Female	dead	alive, other area	grade 4	Excellent	No	No	No	6	Not indicated	negative
2858	8	Female	alive, living in this HH	alive, living in this HH	grade 2	Excellent	No	No	No	6	Negative	negative
2860	15	Female	alive, living in this HH	alive, another HH	form 2	Fair	No	No	Yes	6	Not indicated	negative
2861	8	Male	alive, living in this HH	alive, living in this HH	grade 2	Excellent	No	No	No	6	Not indicated	negative
2862	13	Male	alive, living in this HH	alive, living in this HH	grade 7	Good	No	No	No	6	Not indicated	negative
2864	15	Male	alive, living in this HH	alive, living in this HH	form 1	Good	No	No	No	6	Not indicated	negative
2865	11	Male	alive, living in this HH	alive, living in this HH	grade 6	Excellent	No	No	No	6	Negative	negative
2868	9	Female	alive, living in this HH	alive, living in this HH	grade 4	Good	No	No	No	6	Negative	negative
2869	14	Male	alive, living in this HH	alive, living in this HH	grade 7	Excellent	No	No	No	6	Negative	negative
2879	11	Male	alive, living in this HH	alive, living in this HH	grade 5	Excellent	No	No	No	6	Not indicated	negative
2880	13	Male	alive, living in this HH	alive, living in this HH	grade 6	Excellent	No	No	No	6	Not indicated	negative
2881	8	Female	alive, living in this HH	alive, living in this HH	grade 2	Good	No	No	No	6	Not indicated	negative
2884	14	Male	alive, living in this HH	alive, living in this HH	grade 7	Good	No	No	No	6	Negative	negative
2885	13	Female	alive, living in this HH	alive, other area	grade 6	Good	No	No	No	6	Not indicated	negative
2886	17	Male	alive, living in this HH	alive, living in this HH		Excellent	No	No	No	6	Not indicated	negative
2887	16	Female	alive, living in this HH	alive, other area	form 1	Excellent	No	Yes	No	6	Not indicated	negative
2888	16	Male	alive, living in this HH	alive, living in this HH	form 3	Good	No	No	No	6	Not indicated	negative
2889	14	Male	dead	dead	form 1	Excellent	No	No	No	6	Not indicated	negative
2890	13	Male	alive, other area	alive, other area	grade 6	Excellent	No	No	Yes	6	Not indicated	negative
2891	16	Female	alive, other area	alive, other area	form 3	Excellent	No	No	No	6	Not indicated	negative
2892	14	Female	alive, living in this HH	dead	grade 4	Excellent	No	No	No	6	Negative	negative
2900	11	Male	alive, living in this HH	alive, living in this HH	grade 6	Good	No	No	No	6	Not indicated	negative
2901	16	Male	alive, living in this HH	alive, living in this HH	form 3	Fair	No	Yes	No	6	Not indicated	negative
2902	8	Female	alive, living in this HH	alive, living in this HH	grade 2	Good	No	No	No	6	Not indicated	negative
2903	17	Male	alive, living in this HH	alive, living in this HH	form 3	Excellent	No	No	No	6	Negative	negative
2904	10	Male	alive, living in this HH	alive, living in this HH	grade 5	Excellent	No	No	No	6	Not indicated	negative
2905	15	Female	dead	dead	form 3	Good	No	No	No	6	Not indicated	negative
2907	15	Female	alive, other area	alive, other area	form 2	Good	No	No	No	6	Negative	negative
2908	16	Female	alive, living in this HH	alive, living in this HH	form 4	Good	No	No	No	6	Negative	negative
2909	11	Female	alive, living in this HH	alive, living in this HH	grade 5	Good	No	No	No	6	Not indicated	negative
2910	16	Male	alive, other area	alive, other area	form 2	Fair	No	No	No	6	Not indicated	negative
2912	9	Female	alive, living in this HH	alive, other country	grade 4	Good	No	No	No	6	Not indicated	negative
2913	11	Male	alive, living in this HH	alive, living in this HH	grade 6	Good	No	No	No	6	Not indicated	negative
2914	17	Female	alive, other area	alive, other country	form 2	Good	No	No	No	6	Not indicated	negative
2919	14	Male	alive, living in this HH	alive, living in this HH	form 1	Excellent	No	No	No	6	Not indicated	negative
2920	17	Male	dead	dead	form 3	Good	No	No	No	6	Not indicated	negative
2921	10	Female	alive, living in this HH	alive, living in this HH	grade 4	Good	No	No	No	6	Not indicated	negative
2923	13	Female	alive, living in this HH	alive, living in this HH	grade 7	Good	No	No	No	6	Not indicated	negative
2924	16	Female	alive, living in this HH	alive, living in this HH	form 3	Excellent	No	No	No	6	Not indicated	negative
2925	14	Male	alive, living in this HH	alive, living in this HH	form 1	Excellent	No	No	No	6	Not indicated	negative
2926	10	Female	alive, living in this HH	alive, living in this HH	grade 5	Good	No	No	No	6	Not indicated	negative
2927	10	Female	alive, living in this HH	dead	grade 4	Good	No	No	No	6	Not indicated	negative
2928	10	Female	alive, living in this HH	alive, living in this HH	grade 4	Good	No	Yes	No	6	Not indicated	negative
2929	17	Male	alive, living in this HH	dead	form 4	Excellent	No	No	No	6	Not indicated	negative
2930	8	Female	alive, living in this HH	alive, living in this HH	grade 2	Good	No	No	No	6	Not indicated	negative
2931	17	Female	dead	dead	form 4	Excellent	No	No	No	6	Not indicated	negative
2932	10	Male	alive, living in this HH	alive, living in this HH	grade 4	Excellent	No	No	No	6	Not indicated	negative
2933	12	Male	alive, living in this HH	alive, living in this HH	grade 6	Excellent	No	No	No	6	Not indicated	negative
2934	9	Male	alive, living in this HH	alive, living in this HH	grade 3	Excellent	No	No	No	6	Not indicated	negative
2935	10	Female	alive, living in this HH	dead	grade 4	Good	No	No	No	6	Not indicated	negative
2936	13	Female	alive, living in this HH	dead	grade 7	Good	No	No	No	6	Not indicated	negative
2937	17	Female	alive, another HH	alive, another HH	form 4	Good	No	No	No	6	Positive	positive
2939	16	Male	alive, living in this HH	alive, living in this HH	form 2	Good	No	No	No	6	Negative	negative
2940	9	Male	alive, living in this HH	alive, living in this HH	grade 4	Good	No	No	No	6	Not indicated	negative
2942	9	Male	alive, living in this HH	alive, living in this HH	grade 3	Good	No	No	No	6	Not indicated	negative
2947	12	Female	alive, living in this HH	alive, living in this HH	grade 6	Good	No	No	No	6	Not indicated	negative
2948	17	Male	alive, living in this HH	dead	form 4	Good	No	No	No	6	Not indicated	negative
2949	12	Female	dead	alive, living in this HH	grade 5	Good	No	No	No	6	Not indicated	negative
2955	14	Female	alive, other country	alive, other area	form 1	Good	No	No	No	1	Not indicated	negative
2957	15	Female	alive, other country	dead	form 2	Good	No	No	No	1	Not indicated	negative
2969	12	Male	alive, living in this HH	alive, living in this HH	grade 6	Excellent	No	No	No	6	Negative	negative
2970	13	Female	alive, living in this HH	alive, living in this HH	grade 6	Excellent	No	No	No	6	Not indicated	negative
2972	14	Male	alive, another HH	alive, another HH	form 1	Excellent	No	No	No	6	Not indicated	negative
2974	12	Female	alive, living in this HH	alive, other country	grade 6	Excellent	No	No	No	6	Not indicated	negative
2976	10	Female	alive, living in this HH	alive, living in this HH	grade 4	Good	No	No	No	1	Not indicated	negative
2978	13	Female	dead	alive, living in this HH	grade 6	Good	No	No	No	6	Not indicated	negative
2979	14	Female	dead	dead	grade 7	Fair	No	No	No	6	Negative	negative
2980	16	Male	dead	alive, living in this HH	form 3	Poor	No	No	Yes	6	Not indicated	negative
2981	12	Female	alive, living in this HH	alive, living in this HH	grade 6	Good	No	No	No	6	Not indicated	negative
2982	16	Female	alive, living in this HH	alive, living in this HH	form 3	Excellent	No	No	Yes	6	Not indicated	negative
2983	12	Male	alive, living in this HH	alive, living in this HH	grade 6	Good	No	Yes	No	6	Not indicated	negative
2984	16	Female	alive, living in this HH	alive, living in this HH	form 4	Fair	No	No	Yes	6	Not indicated	negative
2985	13	Male	alive, living in this HH	alive, living in this HH	grade 6	Good	No	No	No	6	Not indicated	negative
2986	8	Male	alive, living in this HH	alive, living in this HH	grade 1	Good	No	No	No	6	Not indicated	negative
2993	10	Female	alive, living in this HH	alive, living in this HH	grade 5	Excellent	No	Yes	No	6	Negative	negative
2994	14	Female	alive, another HH	alive, another HH	grade 6	Good	No	No	No	1	Not indicated	negative
2995	10	Male	alive, another HH	alive, another HH	grade 3	Good	No	No	No	6	Not indicated	negative
2996	17	Female	alive, living in this HH	alive, living in this HH	form 5	Excellent	No	No	No	6	Not indicated	negative
2998	16	Female	alive, living in this HH	alive, living in this HH	form 3	Excellent	No	Yes	No	6	Not indicated	negative
2999	12	Female	alive, living in this HH	alive, living in this HH	grade 7	Excellent	No	No	No	6	Not indicated	negative
3001	10	Female	alive, living in this HH	alive, living in this HH	grade 4	Excellent	No	No	No	6	Not indicated	negative
3002	12	Female	dead	dead	grade 6	Excellent	No	No	No	6	Not indicated	negative
3003	8	Female	alive, other country	alive, other country	grade 2	Good	No	Yes	No	6	Not indicated	negative
3004	12	Male	alive, living in this HH	alive, living in this HH	grade 7	Good	No	No	No	6	Not indicated	negative
3005	8	Male	alive, other area	alive, another HH	grade 1	Excellent	No	No	No	6	Not indicated	negative
3006	14	Male	alive, living in this HH	dead	form 1	Good	No	No	No	6	Not indicated	negative
3008	16	Female	dead	alive, other area	form 2	Good	No	No	No	6	Not indicated	negative
3009	16	Female	alive, other area	dead	form 1	Good	No	No	No	6	Not indicated	negative
3010	15	Male	dead	dead	form 1	Good	No	No	No	6	Negative	negative
3012	14	Male	alive, other country	alive, other country	grade 7	Good	No	No	No	6	Not indicated	negative
3013	15	Female	alive, other area	alive, other area	form 2	Excellent	No	No	No	6	Not indicated	negative
3014	15	Male	alive, other area	alive, other area	form 1	Excellent	No	No	No	6	Negative	negative
3016	17	Female	dead	dead	form 4	Good	No	No	No	6	Not indicated	negative
3017	12	Female	alive, other country	alive, other country	grade 7	Good	No	Yes	No	6	Not indicated	negative
3018	15	Female	dead	dead	form 3	Fair	No	No	No	6	Not indicated	negative
3019	11	Female	alive, living in this HH	alive, living in this HH	grade 5	Excellent	No	No	No	6	Negative	negative
3021	10	Female	alive, other country	dead	grade 6	Excellent	No	No	No	6	Negative	negative
3022	17	Male	alive, living in this HH	dead	form 4	Good	No	No	No	1	Not indicated	positive
3024	15	Male	alive, other area	alive, other area	grade 7	Good	No	No	No	6	Not indicated	positive
3026	8	Female	alive, living in this HH	alive, living in this HH	grade 2	Good	No	No	No	6	Not indicated	negative
3027	14	Female	alive, living in this HH	alive, living in this HH	form 2	Good	No	No	No	6	Not indicated	negative
3028	9	Male	alive, living in this HH	alive, living in this HH	grade 3	Good	No	No	No	6	Not indicated	negative
3029	15	Male	alive, living in this HH	alive, living in this HH	form 1	Excellent	No	No	No	6	Not indicated	negative
3030	15	Female	alive, living in this HH	alive, living in this HH	form 2	Fair	Yes	No	No	6	Not indicated	negative
3031	15	Female	alive, living in this HH	dead	form 2	Excellent	No	No	No	6	Not indicated	negative
3033	16	Female	alive, living in this HH	alive, living in this HH	form 4	Good	No	No	No	6	Not indicated	negative
3034	9	Female	alive, living in this HH	alive, living in this HH	grade 3	Good	No	No	No	6	Not indicated	negative
3035	14	Female	alive, living in this HH	alive, living in this HH	grade 2	Good	No	No	No	6	Not indicated	negative
3036	17	Male	alive, living in this HH	dead	form 3	Excellent	No	Yes	No	6	Negative	negative
3037	15	Female	alive, living in this HH	alive, living in this HH	form 3	Good	No	No	No	6	Not indicated	negative
3039	8	Male	alive, living in this HH	alive, living in this HH	grade 3	Fair	No	No	No	6	Not indicated	negative
3111	15	Male	alive, living in this HH	dead	form 3	Good	No	No	No	6	Not indicated	positive
3324	16	Female	alive, living in this HH	alive, living in this HH	form 3	Excellent	No	No	No	6	Not indicated	negative
3325	11	Male	alive, living in this HH	alive, living in this HH	grade 5	Excellent	No	No	No	6	Not indicated	negative
3330	16	Male	alive, other country	alive, living in this HH	form 3	Excellent	No	No	No	6	Not indicated	negative
3332	15	Female	dead	dead	form 1	Excellent	No	No	No	6	Not indicated	negative
3333	15	Female	alive, living in this HH	alive, living in this HH	form 1	Excellent	No	No	No	6	Not indicated	negative
3334	9	Female	alive, living in this HH	alive, living in this HH	grade 2	Excellent	No	No	No	6	Not indicated	negative
3335	11	Male	alive, living in this HH	alive, living in this HH	grade 4	Excellent	No	No	No	6	Not indicated	negative
3336	12	Male	alive, another HH	alive, another HH	grade 6	Good	No	No	No	6	Not indicated	negative
3337	12	Male	dead	dead	grade 5	Excellent	No	No	No	6	Negative	negative
3338	9	Male	alive, living in this HH	alive, living in this HH	grade 4	Excellent	No	No	No	6	Not indicated	negative
3339	16	Female	alive, living in this HH	alive, living in this HH	form 3	Excellent	No	No	No	6	Not indicated	negative
3340	12	Female	alive, another HH	alive, living in this HH	grade 6	Excellent	No	No	No	6	Not indicated	negative
3341	9	Male	alive, living in this HH	alive, living in this HH	grade 3	Excellent	No	No	No	6	Not indicated	negative
3342	9	Male	alive, another HH	alive, living in this HH	grade 3	Excellent	No	No	No	6	Not indicated	negative
3343	16	Female	dead	alive, other area	grade 7	Excellent	No	No	No	6	Not indicated	negative
3344	8	Male	alive, other area	alive, other area	grade 2	Excellent	No	No	No	6	Not indicated	negative
3345	15	Male	alive, living in this HH	dead	form 2	Excellent	No	No	No	6	Not indicated	negative
3346	16	Male	dead	alive, other country	form 3	Good	No	No	No	6	Negative	negative
3347	12	Male	alive, living in this HH	dead	grade 6	Good	No	No	No	6	Not indicated	negative
3348	8	Female	alive, living in this HH	alive, other area	grade 1	Fair	No	No	No	6	Positive	negative
3349	16	Female	dead	dead	form 2	Good	No	No	No	6	Not indicated	negative
3350	17	Female	alive, other area	alive, other area	form 4	Fair	No	No	No	6	Not indicated	negative
3351	17	Female	alive, other area	alive, other area	form 4	Good	No	Yes	No	6	Not indicated	negative
3352	11	Male	alive, living in this HH	alive, living in this HH	grade 5	Excellent	No	No	No	6	Not indicated	negative
3353	17	Male	alive, living in this HH	alive, living in this HH	form 3	Good	No	No	No	6	Not indicated	negative
3354	12	Female	alive, living in this HH	alive, living in this HH	grade 6	Fair	No	No	No	6	Not indicated	negative
3355	13	Female	alive, living in this HH	alive, living in this HH	grade 7	Good	No	No	No	6	Not indicated	negative
3357	14	Female	alive, living in this HH	alive, living in this HH	form 1	Fair	No	Yes	No	6	Not indicated	negative
3358	13	Male	alive, living in this HH	alive, living in this HH	grade 7	Good	No	No	No	6	Not indicated	negative
3360	16	Female	alive, living in this HH	alive, living in this HH	form 3	Excellent	No	No	No	6	Not indicated	negative
3361	16	Female	alive, living in this HH	alive, living in this HH	form 3	Excellent	No	No	No	6	Not indicated	negative
3362	17	Male	alive, living in this HH	alive, living in this HH	form 3	Excellent	No	No	No	6	Not indicated	negative
3363	12	Female	alive, living in this HH	alive, living in this HH	grade 5	Excellent	No	No	Yes	6	Negative	negative
3364	8	Female	alive, other area	alive, other area	grade 2	Good	No	No	No	6	Not indicated	negative
3365	15	Female	alive, living in this HH	alive, living in this HH	form 2	Excellent	No	No	No	6	Negative	negative
3367	10	Male	alive, living in this HH	alive, living in this HH	grade 4	Good	No	No	No	6	Not indicated	negative
3368	13	Male	alive, living in this HH	alive, living in this HH	grade 6	Good	No	No	No	6	Not indicated	negative
3369	14	Male	alive, living in this HH	alive, living in this HH	form 1	Good	No	No	Yes	6	Not indicated	negative
3371	15	Female	alive, living in this HH	alive, living in this HH	form 2	Good	No	No	No	6	Not indicated	negative
3372	9	Male	alive, another HH	alive, another HH	grade 3	Excellent	No	No	No	6	Not indicated	negative
3373	16	Female	alive, living in this HH	dead	form 3	Excellent	No	No	No	6	Not indicated	negative
3374	13	Female	alive, living in this HH	alive, living in this HH	grade 7	Excellent	No	No	No	6	Not indicated	negative
3375	14	Female	alive, living in this HH	alive, living in this HH	form 2	Excellent	No	No	Yes	6	Not indicated	negative
3376	15	Male	alive, living in this HH	alive, another HH	form 2	Excellent	No	No	No	6	Negative	negative
3377	11	Male	alive, living in this HH	alive, living in this HH	grade 5	Excellent	No	No	No	6	Not indicated	negative
3378	15	Male	alive, living in this HH	alive, another HH	form 2	Excellent	No	No	No	6	Negative	negative
3379	11	Female	alive, living in this HH	dead	grade 5	Excellent	No	No	No	6	Not indicated	negative
3380	14	Female	alive, living in this HH	dead	form 2	Fair	No	Yes	Yes	6	Negative	negative
3381	11	Female	alive, living in this HH	dead	grade 6	Excellent	No	No	No	6	Not indicated	negative
3383	15	Female	alive, living in this HH	alive, living in this HH	form 3	Excellent	No	No	No	6	Not indicated	negative
3384	10	Female	alive, living in this HH	alive, living in this HH	grade 6	Excellent	No	No	No	6	Not indicated	negative
3386	12	Female	alive, other area	dead	grade 5	Good	No	No	No	6	Not indicated	negative
3387	9	Female	alive, living in this HH	alive, other area	grade 4	Excellent	No	No	No	6	Negative	negative
3388	14	Male	alive, living in this HH	alive, other area	form 2	Excellent	No	No	No	6	Not indicated	negative
3390	16	Female	alive, other area	alive, other area	form 3	Good	No	No	No	6	Negative	negative
3391	17	Female	alive, living in this HH	dead	form 4	Good	No	No	No	6	Not indicated	negative
3394	9	Male	alive, another HH	dead	grade 4	Fair	No	No	No	6	Not indicated	negative
3395	12	Female	alive, other area	alive, living in this HH	grade 6	Good	No	No	No	6	Not indicated	negative
3396	15	Female	alive, living in this HH	dead	form 2	Good	No	No	No	6	Not indicated	negative
3397	12	Female	alive, living in this HH	alive, other area	grade 7	Good	No	No	No	6	Not indicated	negative
3398	14	Male	alive, living in this HH	alive, living in this HH	form 1	Excellent	No	No	No	6	Not indicated	negative
3399	16	Male	alive, living in this HH	alive, living in this HH	form 3	Excellent	No	No	No	6	Not indicated	negative
3401	11	Male	alive, living in this HH	alive, living in this HH	grade 5	Good	No	No	No	6	Not indicated	negative
3402	12	Male	alive, living in this HH	alive, living in this HH	grade 6	Good	No	No	No	6	Not indicated	negative
3403	16	Male	alive, living in this HH	alive, living in this HH	form 2	Good	No	No	No	6	Not indicated	negative
3405	14	Female	alive, living in this HH	alive, living in this HH	form 2	Good	No	No	No	6	Not indicated	negative
3406	16	Female	alive, other area	alive, other country	form 1	Good	No	No	No	6	Negative	negative
3408	11	Male	alive, living in this HH	alive, living in this HH	grade 6	Good	No	No	No	6	Not indicated	negative
3410	8	Male	alive, living in this HH	alive, living in this HH	grade 2	Good	No	No	No	6	Not indicated	negative
3411	10	Male	alive, living in this HH	alive, living in this HH	grade 2	Good	No	No	No	6	Negative	negative
3413	10	Female	alive, living in this HH	alive, living in this HH	grade 3	Good	No	No	No	6	Negative	negative
3414	8	Male	alive, living in this HH	alive, living in this HH	grade 2	Good	No	No	No	6	Not indicated	negative
3415	9	Male	alive, living in this HH	alive, living in this HH	grade 4	Good	No	No	No	6	Not indicated	negative
3416	17	Female	alive, living in this HH	alive, living in this HH	form 4	Good	No	No	No	6	Not indicated	negative
3417	17	Female	alive, another HH	alive, another HH	form 3	Good	No	No	No	6	Not indicated	positive
3418	15	Male	alive, other area	alive, other area	form 3	Good	No	No	No	6	Negative	negative
3419	8	Female	alive, living in this HH	alive, living in this HH	grade 2	Good	No	No	No	6	Not indicated	negative
3420	9	Female	dead	dead	grade 3	Good	No	No	No	6	Negative	negative
3421	14	Female	alive, living in this HH	alive, living in this HH	form 1	Good	No	No	No	6	Not indicated	negative
3424	11	Female	alive, living in this HH	alive, living in this HH	grade 5	Good	No	No	No	6	Not indicated	negative
3428	12	Male	alive, other country	dead	grade 6	Good	No	No	No	6	Negative	negative
3429	12	Male	alive, other country	dead	grade 6	Good	No	No	No	6	Not indicated	negative
3430	16	Male	dead	dead	form 3	Good	No	No	No	6	Not indicated	negative
3431	14	Male	alive, other area	dead	form 1	Good	No	No	No	6	Negative	negative
3436	15	Male	alive, living in this HH	alive, living in this HH	form 1	Excellent	No	No	No	6	Not indicated	negative
3438	10	Male	alive, living in this HH	alive, living in this HH	grade 4	Excellent	No	No	No	6	Not indicated	negative
3439	13	Male	dead	don't know	grade 5	Good	No	No	No	6	Not indicated	negative
3440	8	Female	alive, living in this HH	alive, living in this HH	grade 3	Excellent	No	No	No	6	Not indicated	negative
3441	11	Male	alive, living in this HH	alive, living in this HH	grade 5	Good	No	No	No	6	Negative	negative
3443	14	Male	dead	alive, other area	grade 7	Good	No	No	No	6	Not indicated	negative
3444	14	Male	alive, living in this HH	alive, living in this HH	form 1	Excellent	No	No	No	6	Not indicated	negative
3445	14	Female	alive, living in this HH	alive, living in this HH	form 1	Excellent	No	No	No	6	Not indicated	negative
3446	11	Male	alive, living in this HH	alive, living in this HH	grade 5	Excellent	No	No	No	6	Not indicated	negative
3447	9	Male	alive, another HH	dead	grade 2	Excellent	No	No	No	6	Not indicated	negative
3448	17	Male	alive, living in this HH	alive, living in this HH	form 4	Excellent	No	No	No	6	Not indicated	negative
3449	14	Male	alive, living in this HH	alive, living in this HH	form 1	Excellent	No	No	No	6	Not indicated	negative
3450	8	Female	alive, living in this HH	alive, living in this HH	grade 2	Excellent	No	No	No	6	Not indicated	negative
3451	15	Female	alive, living in this HH	alive, living in this HH	form 1	Excellent	No	No	No	6	Not indicated	negative
3452	17	Male	alive, living in this HH	alive, living in this HH	form 2	Excellent	No	No	No	6	Not indicated	negative
3453	13	Female	alive, living in this HH	alive, living in this HH	form 1	Excellent	No	No	No	6	Not indicated	negative
3454	17	Female	alive, living in this HH	alive, living in this HH	form 4	Excellent	No	No	No	6	Not indicated	negative
3455	9	Female	alive, living in this HH	alive, living in this HH	grade 3	Excellent	No	No	No	6	Not indicated	negative
3456	10	Male	alive, living in this HH	alive, another HH	grade 4	Good	No	No	No	6	Not indicated	negative
3457	9	Male	alive, living in this HH	alive, living in this HH	grade 3	Excellent	No	No	No	6	Not indicated	negative
3458	15	Male	alive, living in this HH	alive, living in this HH	form 1	Excellent	No	No	No	6	Not indicated	negative
3459	9	Female	alive, living in this HH	alive, living in this HH	grade 3	Excellent	No	No	No	6	Not indicated	negative
3460	10	Male	alive, living in this HH	alive, living in this HH	grade 3	Good	No	No	No	6	Not indicated	negative
3461	8	Female	alive, another HH	alive, living in this HH	grade 3	Excellent	No	No	No	6	Not indicated	negative
3462	9	Female	alive, living in this HH	alive, living in this HH	grade 4	Excellent	No	No	No	6	Not indicated	negative
3463	12	Male	alive, living in this HH	alive, living in this HH	grade 5	Good	No	No	No	6	Not indicated	negative
3465	12	Female	alive, living in this HH	alive, living in this HH	grade 6	Excellent	No	No	No	6	Not indicated	negative
3466	10	Female	alive, living in this HH	alive, living in this HH	grade 4	Excellent	No	No	No	6	Not indicated	negative
3467	15	Female	alive, living in this HH	dead	form 3	Excellent	No	Yes	No	6	Not indicated	negative
3468	17	Male	dead	alive, other area	form 4	Good	No	No	No	6	Negative	negative
3469	12	Male	alive, living in this HH	dead	grade 7	Excellent	No	Yes	No	6	Negative	negative
3470	15	Male	alive, other area	alive, living in this HH	form 3	Excellent	No	No	No	6	Negative	negative
3471	11	Female	alive, living in this HH	dead	grade 5	Excellent	No	No	No	6	Not indicated	negative
3472	12	Male	alive, living in this HH	alive, other area		Excellent	No	No	No	6	Not indicated	negative
3473	15	Female	alive, living in this HH	dead	form 3	Good	No	No	No	6	Not indicated	negative
3474	14	Male	alive, other country	alive, other country	form 2	Good	No	No	No	6	Negative	negative
3475	10	Female	alive, living in this HH	alive, living in this HH	grade 5	Excellent	No	No	No	6	Negative	negative
3476	8	Male	alive, living in this HH	alive, living in this HH	grade 1	Good	No	No	No	6	Not indicated	negative
3477	10	Male	alive, living in this HH	alive, living in this HH	grade 5	Excellent	No	Yes	No	6	Not indicated	negative
3479	9	Female	alive, living in this HH	alive, other area	grade 4	Good	No	No	No	6	Not indicated	negative
3480	9	Male	alive, living in this HH	alive, another HH	grade 3	Excellent	No	No	No	6	Not indicated	negative
3481	15	Female	alive, another HH	alive, other area	form 3	Good	No	No	No	6	Not indicated	negative
3483	17	Male	alive, other country	dead	form 4	Excellent	No	No	No	6	Not indicated	negative
3484	8	Female	alive, living in this HH	alive, other area	grade 4	Good	No	Yes	No	6	Negative	negative
3485	17	Female	alive, other area	alive, other area	form 2	Excellent	No	No	No	6	Not indicated	negative
3486	10	Male	alive, living in this HH	alive, other area	grade 5	Excellent	No	Yes	No	6	Negative	negative
3552	11	Male	alive, living in this HH	alive, living in this HH	grade 6	Good	No	No	No	6	Not indicated	negative
3651	11	Female	alive, living in this HH	alive, living in this HH	grade 5	Excellent	No	No	No	6	Not indicated	negative
3652	9	Female	alive, living in this HH	alive, living in this HH	grade 4	Good	No	No	No	6	Not indicated	negative
3654	12	Male	alive, other area	alive, other area	grade 7	Good	No	No	No	6	Not indicated	negative
3655	14	Female	alive, living in this HH	alive, living in this HH	form 1	Excellent	No	No	No	6	Negative	negative
3656	10	Male	alive, another HH	alive, other area	grade 3	Good	No	No	No	6	Not indicated	negative
3657	9	Female	alive, another HH	alive, another HH	grade 3	Excellent	No	Yes	No	6	Not indicated	negative
3658	17	Male	alive, another HH	alive, another HH	form 3	Excellent	No	No	Yes	6	Negative	negative
3659	8	Female	alive, other area	alive, other area	grade 1	Excellent	No	No	No	6	Not indicated	negative
3660	11	Female	alive, living in this HH	alive, living in this HH	grade 4	Excellent	No	No	No	6	Not indicated	negative
3661	8	Male	alive, living in this HH	alive, living in this HH	grade 2	Good	No	No	No	6	Not indicated	negative
3662	14	Male	alive, living in this HH	alive, living in this HH	form 1	Excellent	No	No	Yes	6	Not indicated	negative
3663	9	Female	alive, living in this HH	alive, living in this HH	grade 3	Good	No	No	No	6	Not indicated	negative
3664	17	Male	alive, living in this HH	dead	form 2	Fair	No	No	No	6	Negative	negative
3666	11	Female	alive, other country	alive, other country	grade 5	Good	No	No	No	6	Not indicated	negative
3667	14	Male	alive, living in this HH	alive, other country	form 1	Good	No	No	No	6	Not indicated	negative
3669	10	Male	alive, living in this HH	alive, living in this HH	grade 4	Good	No	No	No	6	Not indicated	negative
3670	11	Female	alive, living in this HH	alive, other country	grade 5	Good	No	No	No	6	Not indicated	negative
3671	14	Male	alive, living in this HH	alive, living in this HH	form 1	Good	No	No	No	6	Not indicated	negative
3672	13	Male	alive, other area	alive, other area	form 1	Good	No	No	No	6	Not indicated	negative
3673	14	Female	alive, other country	alive, other country	grade 7	Good	No	No	No	6	Negative	negative
3674	13	Male	alive, living in this HH	alive, living in this HH	grade 7	Good	No	No	No	6	Not indicated	negative
3675	10	Male	alive, other area	alive, other area	grade 5	Good	No	No	No	6	Negative	negative
3676	11	Female	alive, living in this HH	alive, other area	grade 5	Excellent	No	No	No	6	Not indicated	negative
3677	13	Female	dead	alive, other area	grade 7	Good	No	No	No	6	Not indicated	negative
3678	17	Female	alive, living in this HH	alive, living in this HH	form 3	Excellent	No	No	No	6	Not indicated	negative
3679	9	Female	alive, living in this HH	alive, living in this HH	grade 3	Good	No	No	No	6	Not indicated	negative
3680	13	Male	alive, living in this HH	alive, living in this HH	grade 7	Good	No	No	No	6	Not indicated	negative
3681	13	Male	alive, living in this HH	alive, living in this HH	form 1	Good	No	No	No	6	Negative	negative
3682	14	Male	alive, other area	alive, other area	grade 7	Excellent	No	No	No	6	Not indicated	negative
3685	14	Male	alive, living in this HH	alive, living in this HH	form 1	Good	No	No	No	6	Not indicated	negative
3686	16	Male	alive, other area	alive, another HH	form 3	Excellent	No	No	No	6	Not indicated	negative
3688	8	Male	alive, living in this HH	alive, living in this HH	grade 2	Good	No	No	No	6	Not indicated	negative
3689	11	Male	alive, living in this HH	alive, living in this HH	grade 5	Good	No	No	No	6	Not indicated	negative
3690	16	Male	alive, living in this HH	alive, living in this HH	form 2	Good	No	No	No	6	Not indicated	negative
3691	14	Female	alive, living in this HH	alive, other area	form 1	Excellent	No	No	No	6	Not indicated	negative
3692	15	Female	alive, living in this HH	alive, other area	form 2	Excellent	No	No	No	6	Not indicated	negative
3693	8	Female	alive, another HH	alive, living in this HH	grade 2	Excellent	No	No	No	6	Not indicated	negative
3696	15	Female	alive, other area	alive, other area	form 2	Excellent	No	Yes	No	6	Not indicated	negative
3699	16	Male	alive, living in this HH	alive, living in this HH	form 4	Excellent	No	No	No	6	Not indicated	negative
3702	10	Female	alive, living in this HH	alive, living in this HH	grade 6	Good	No	No	No	6	Not indicated	negative
3705	9	Female	alive, living in this HH	alive, living in this HH	grade 3	Good	No	No	No	6	Not indicated	negative
3706	8	Male	alive, living in this HH	alive, another HH	grade 2	Good	No	No	No	6	Not indicated	negative
3707	10	Male	alive, other area	dead	grade 4	Good	No	No	No	6	Not indicated	negative
3708	11	Male	alive, other country	alive, another HH	grade 5	Excellent	No	No	No	6	Not indicated	negative
3709	10	Male	alive, living in this HH	alive, living in this HH	grade 4	Good	No	No	No	6	Negative	negative
3710	16	Female	alive, other area	alive, other area	form 3	Good	No	No	No	6	Not indicated	negative
3711	12	Male	alive, living in this HH	alive, another HH	grade 6	Good	No	No	No	6	Not indicated	negative
3712	8	Male	alive, other area	alive, other area	grade 2	Good	No	No	No	6	Not indicated	negative
3713	8	Male	alive, another HH	alive, another HH	grade 2	Good	No	No	No	6	Not indicated	negative
3715	14	Female	alive, other area	alive, other area	form 1	Excellent	No	No	No	6	Negative	negative
3719	10	Female	alive, living in this HH	alive, living in this HH	grade 4	Good	No	No	No	6	Not indicated	negative
3720	10	Male	alive, living in this HH	alive, living in this HH	grade 4	Good	No	No	No	6	Not indicated	negative
3722	12	Female	alive, living in this HH	alive, living in this HH	grade 4	Good	No	No	No	6	Not indicated	negative
3726	8	Male	alive, living in this HH	dead	grade 2	Good	No	Yes	No	6	Not indicated	negative
3727	14	Female	alive, living in this HH	alive, living in this HH	form 1	Excellent	No	No	No	6	Not indicated	negative
3728	11	Female	alive, living in this HH	alive, living in this HH	grade 5	Good	No	No	No	6	Not indicated	negative
3729	8	Male	alive, living in this HH	alive, living in this HH	grade 1	Good	No	No	No	6	Not indicated	negative
3730	16	Male	alive, living in this HH	dead	form 1	Good	No	No	No	6	Not indicated	negative
3731	13	Male	alive, living in this HH	dead	grade 6	Fair	No	No	No	6	Not indicated	negative
3732	16	Male	alive, living in this HH	dead	form 2	Good	No	Yes	No	6	Not indicated	negative
3733	17	Male	alive, living in this HH	dead	form 3	Good	No	No	No	6	Not indicated	negative
3734	8	Male	alive, living in this HH	alive, other country	grade 3	Good	No	No	No	6	Negative	negative
3736	14	Female	alive, living in this HH	alive, other country	form 2	Good	No	No	No	6	Not indicated	negative
3741	13	Female	alive, living in this HH	alive, other area	grade 7	Excellent	No	No	No	6	Not indicated	negative
3742	14	Female	alive, living in this HH	alive, living in this HH	grade 7	Excellent	No	No	No	6	Not indicated	negative
3743	17	Female	alive, other area	dead	form 4	Excellent	No	No	No	6	Not indicated	negative
3744	14	Female	alive, living in this HH	alive, living in this HH	grade 7	Excellent	No	No	No	6	Not indicated	negative
3745	16	Female	alive, living in this HH	alive, living in this HH	form 4	Excellent	No	Yes	No	6	Not indicated	negative
3746	14	Female	alive, living in this HH	alive, living in this HH	grade 7	Excellent	No	No	No	6	Not indicated	negative
3747	16	Female	dead	alive, living in this HH	form 3	Excellent	No	No	No	6	Not indicated	negative
3749	16	Female	alive, other country	alive, other country	form 3	Good	No	No	No	6	Not indicated	negative
3753	11	Male	alive, other area	alive, other country	grade 5	Excellent	No	No	No	6	Not indicated	negative
3757	10	Male	alive, living in this HH	dead	grade 5	Excellent	No	No	No	6	Not indicated	negative
3759	12	Female	dead	alive, living in this HH	grade 6	Excellent	No	No	No	6	Not indicated	negative
3760	12	Male	alive, living in this HH	alive, living in this HH	grade 5	Excellent	No	No	No	6	Not indicated	negative
3763	11	Female	alive, other area	alive, another HH	grade 5	Excellent	No	No	No	6	Not indicated	negative
3766	15	Male	alive, other area	alive, other area	form 1	Good	No	No	No	6	Not indicated	negative
3767	11	Female	alive, living in this HH	alive, living in this HH	grade 6	Excellent	No	No	No	6	Not indicated	negative
3768	8	Male	alive, living in this HH	alive, living in this HH	grade 4	Good	No	No	No	6	Negative	negative
3769	16	Male	alive, living in this HH	dead	form 3	Good	No	No	No	6	Not indicated	negative
3770	10	Male	alive, living in this HH	alive, living in this HH	grade 5	Excellent	No	No	No	6	Not indicated	negative
3771	14	Female	alive, living in this HH	alive, living in this HH	form 2	Excellent	No	No	No	6	Not indicated	negative
3772	13	Female	alive, living in this HH	alive, living in this HH	form 1	Good	No	No	Yes	6	Negative	negative
3776	10	Female	alive, living in this HH	dead	grade 5	Good	No	No	No	6	Negative	negative
3777	17	Female	alive, other area	alive, other area	form 4	Good	No	No	No	6	Not indicated	negative
3778	12	Male	alive, living in this HH	alive, living in this HH	grade 4	Good	No	No	No	6	Not indicated	negative
3779	14	Female	alive, another HH	dead	form 2	Excellent	No	No	No	6	Not indicated	negative
3780	10	Male	alive, another HH	alive, another HH	grade 5	Excellent	No	No	No	6	Not indicated	negative
3781	17	Male	alive, living in this HH	alive, living in this HH	form 4	Excellent	No	No	No	6	Not indicated	negative
3782	9	Female	alive, living in this HH	alive, another HH	grade 2	Excellent	No	No	No	6	Not indicated	negative
3783	9	Female	alive, living in this HH	alive, living in this HH	grade 3	Excellent	No	No	No	6	Not indicated	negative
3784	12	Male	alive, living in this HH	alive, living in this HH	grade 6	Excellent	No	No	No	6	Not indicated	negative
3794	15	Male	alive, living in this HH	alive, living in this HH	form 1	Excellent	No	No	Yes	6	Not indicated	negative
3795	8	Male	alive, living in this HH	alive, living in this HH	grade 1	Good	No	No	No	6	Not indicated	negative
3796	17	Male	alive, living in this HH	alive, living in this HH	form 3	Good	No	No	Yes	6	Not indicated	negative
3801	8	Female	alive, living in this HH	alive, living in this HH	grade 3	Good	No	No	No	6	Not indicated	negative
3802	8	Female	alive, living in this HH	alive, living in this HH	grade 2	Good	No	No	No	6	Not indicated	negative
3804	8	Male	alive, living in this HH	alive, another HH	grade 2	Good	No	No	No	6	Not indicated	negative
3805	8	Female	alive, living in this HH	alive, living in this HH	grade 2	Good	No	No	No	6	Not indicated	negative
3809	12	Male	alive, living in this HH	alive, living in this HH	grade 6	Good	No	No	No	6	Not indicated	negative
3813	16	Male	alive, other area	alive, other area	form 3	Excellent	No	No	No	6	Not indicated	negative
3814	14	Female	alive, other country	dead	form 2	Good	No	No	No	6	Not indicated	negative
3815	17	Female	alive, living in this HH	dead	form 3	Excellent	No	No	No	6	Negative	positive
3817	13	Male	alive, living in this HH	dead	grade 6	Good	No	No	No	6	Not indicated	negative
3819	8	Female	alive, living in this HH	alive, living in this HH	grade 4	Good	No	No	No	6	Not indicated	negative
3820	12	Female	alive, living in this HH	alive, living in this HH	grade 6	Good	No	No	No	6	Not indicated	negative
3822	11	Male	alive, living in this HH	alive, living in this HH	grade 6	Good	No	No	No	6	Not indicated	negative
3823	15	Male	alive, living in this HH	alive, living in this HH	grade 6	Good	No	No	No	6	Not indicated	negative
3824	15	Female	dead	dead	form 3	Excellent	No	No	No	6	Not indicated	negative
3825	9	Male	alive, living in this HH	alive, living in this HH	grade 4	Good	No	No	No	6	Not indicated	negative
3828	13	Male	alive, living in this HH	alive, another HH	grade 7	Good	No	No	No	6	Not indicated	negative
3829	14	Male	alive, another HH	alive, another HH	form 1	Excellent	No	No	No	6	Not indicated	negative
3830	10	Female	alive, living in this HH	alive, another HH	grade 4	Good	No	No	No	6	Not indicated	negative
3831	10	Male	dead	alive, living in this HH	grade 3	Good	No	No	No	6	Not indicated	negative
3832	14	Male	dead	alive, living in this HH	form 1	Good	No	No	No	6	Not indicated	negative
3833	15	Male	dead	dead	form 1	Good	No	No	No	6	Not indicated	negative
3834	13	Male	dead	dead	grade 7	Good	No	No	Yes	6	Positive	positive
3835	15	Male	alive, living in this HH	alive, living in this HH	form 1	Excellent	No	No	No	6	Not indicated	negative
3837	16	Female	alive, living in this HH	alive, another HH	form 3	Excellent	No	No	No	6	Not indicated	negative
3838	11	Female	alive, living in this HH	alive, living in this HH	grade 5	Good	No	No	No	6	Not indicated	negative
3839	14	Female	alive, living in this HH	alive, another HH	form 1	Good	No	No	No	6	Not indicated	negative
3842	10	Female	alive, living in this HH	alive, another HH	grade 4	Good	No	No	No	6	Not indicated	negative
3848	9	Female	alive, living in this HH	alive, living in this HH	grade 4	Good	No	No	No	6	Not indicated	negative
3849	10	Male	alive, living in this HH	alive, living in this HH	grade 5	Good	No	No	No	6	Negative	negative
3851	8	Male	alive, living in this HH	alive, living in this HH	grade 3	Good	No	No	No	6	Negative	negative
3852	8	Female	alive, other country	alive, another HH	grade 3	Excellent	No	No	No	6	Not indicated	positive
3853	13	Female	alive, other country	dead	form 1	Excellent	No	No	No	6	Not indicated	negative
3854	15	Female	alive, living in this HH	alive, living in this HH	form 4	Excellent	No	No	No	6	Negative	negative
3855	11	Female	alive, living in this HH	alive, living in this HH	grade 4	Good	No	No	No	6	Negative	negative
3856	12	Female	alive, other country	alive, other area	grade 6	Excellent	No	No	No	6	Not indicated	negative
3857	15	Male	alive, living in this HH	alive, living in this HH	form 3	Excellent	No	No	No	6	Not indicated	negative
3858	8	Female	alive, living in this HH	alive, living in this HH	grade 1	Fair	No	Yes	No	6	Positive	positive
3859	8	Female	alive, living in this HH	alive, living in this HH	grade 3	Excellent	No	No	No	6	Not indicated	negative
3860	12	Female	alive, living in this HH	alive, other area	grade 7	Excellent	No	No	No	6	Not indicated	negative
3861	16	Male	alive, other area	dead	form 4	Excellent	No	No	No	6	Not indicated	negative
3863	9	Female	alive, living in this HH	alive, living in this HH	grade 3	Excellent	No	No	No	6	Negative	negative
3864	16	Male	alive, living in this HH	alive, living in this HH	form 3	Excellent	No	Yes	Yes	6	Not indicated	negative
3866	9	Male	alive, living in this HH	alive, living in this HH	grade 3	Excellent	No	No	No	6	Not indicated	negative
3868	17	Male	alive, living in this HH	alive, living in this HH	form 4	Excellent	No	No	No	6	Negative	negative
3870	15	Male	alive, living in this HH	alive, living in this HH	form 2	Fair	No	No	No	6	Not indicated	negative
3871	14	Female	dead	dead	form 2	Excellent	No	Yes	No	6	Not indicated	negative
3872	11	Female	alive, living in this HH	alive, living in this HH	grade 5	Good	No	No	No	6	Not indicated	negative
3873	14	Female	alive, living in this HH	alive, living in this HH	form 1	Excellent	No	No	No	6	Not indicated	negative
3874	12	Male	alive, living in this HH	alive, another HH	grade 5	Excellent	No	No	No	6	Not indicated	negative
3875	10	Female	alive, living in this HH	alive, another HH	grade 3	Excellent	No	No	No	6	Not indicated	negative
3876	14	Male	dead	dead	grade 7	Excellent	No	No	No	6	Not indicated	negative
3877	15	Female	alive, other area	alive, other area	form 2	Good	No	No	No	6	Not indicated	negative
3879	12	Female	alive, another HH	alive, another HH	grade 6	Excellent	No	No	No	6	Not indicated	negative
3880	12	Female	alive, another HH	dead	grade 5	Fair	No	No	No	6	Not indicated	negative
3881	13	Male	alive, living in this HH	alive, other area	grade 7	Excellent	No	No	No	6	Not indicated	negative
3882	14	Male	alive, living in this HH	dead	form 1	Good	No	No	No	6	Not indicated	negative
3883	15	Male	alive, living in this HH	alive, living in this HH	form 2	Excellent	No	No	No	6	Not indicated	negative
3884	12	Female	alive, living in this HH	dead	grade 5	Good	No	No	No	6	Not indicated	negative
3885	10	Male	alive, living in this HH	dead	grade 3	Good	No	No	No	6	Positive	negative
3886	10	Male	alive, living in this HH	alive, living in this HH	grade 3	Excellent	No	No	No	6	Not indicated	negative
3888	13	Male	alive, living in this HH	alive, living in this HH	grade 7	Excellent	No	No	No	6	Not indicated	negative
3889	11	Female	alive, living in this HH	alive, other area	grade 5	Good	No	No	No	6	Not indicated	negative
3890	15	Female	alive, living in this HH	alive, living in this HH	form 2	Excellent	No	No	No	6	Not indicated	negative
3891	10	Male	alive, living in this HH	alive, living in this HH	grade 4	Excellent	No	No	No	6	Not indicated	negative
3892	8	Female	alive, living in this HH	alive, living in this HH	grade 1	Excellent	No	No	No	6	Not indicated	negative
3893	17	Female	dead	dead	form 3	Good	No	No	No	6	Not indicated	negative
3894	15	Female	alive, other area	alive, other area	form 3	Fair	No	No	No	6	Not indicated	negative
3895	13	Male	dead	alive, other area	grade 7	Excellent	No	No	No	6	Not indicated	negative
3896	8	Male	dead	alive, another HH	0	Good	No	No	Yes	6	Positive	positive
3897	9	Female	alive, other country	alive, another HH	grade 4	Good	No	Yes	No	6	Not indicated	negative
3898	17	Male	alive, other country	alive, another HH	form 4	Excellent	No	Yes	No	6	Negative	negative
3900	15	Female	dead	dead	form 2	Good	No	Yes	No	6	Not indicated	negative
3906	9	Female	dead	alive, living in this HH	grade 3	Fair	No	No	No	6	Not indicated	negative
3907	10	Male	alive, living in this HH	alive, living in this HH	grade 5	Good	No	No	No	6	Not indicated	negative
3910	15	Male	alive, living in this HH	dead	form 1	Excellent	No	No	No	6	Not indicated	negative
3914	14	Female	alive, living in this HH	alive, living in this HH	form 2	Excellent	No	No	No	6	Not indicated	negative
3915	8	Female	alive, living in this HH	alive, living in this HH	grade 2	Excellent	No	No	No	6	Not indicated	negative
3916	11	Female	alive, living in this HH	alive, living in this HH	grade 5	Excellent	No	No	No	6	Not indicated	negative
3917	16	Male	alive, living in this HH	dead	form 3	Good	No	No	No	6	Not indicated	negative
3918	15	Female	alive, living in this HH	alive, living in this HH	form 2	Excellent	No	No	No	6	Not indicated	negative
3919	17	Male	dead	dead	form 3	Good	No	No	No	6	Not indicated	positive
3920	8	Male	alive, living in this HH	alive, living in this HH	grade 1	Good	No	No	No	6	Not indicated	negative
3921	15	Female	alive, living in this HH	alive, living in this HH	form 2	Excellent	No	No	No	6	Not indicated	negative
3922	15	Male	alive, living in this HH	alive, living in this HH	form 1	Excellent	No	No	No	6	Not indicated	negative
3923	10	Male	alive, living in this HH	alive, living in this HH	grade 5	Excellent	No	No	No	6	Not indicated	negative
3924	9	Male	alive, living in this HH	alive, living in this HH	grade 4	Good	No	No	No	6	Not indicated	negative
3925	9	Male	alive, living in this HH	alive, living in this HH	grade 2	Good	No	No	No	6	Not indicated	negative
3926	16	Female	alive, living in this HH	alive, living in this HH	form 4	Good	No	No	No	6	Not indicated	negative
3927	14	Female	alive, living in this HH	alive, living in this HH	grade 7	Good	No	No	No	6	Not indicated	negative
3928	9	Male	alive, living in this HH	alive, living in this HH	grade 1	Good	No	No	No	6	Not indicated	negative
3929	12	Male	alive, living in this HH	alive, living in this HH	grade 6	Good	No	No	No	6	Not indicated	negative
3930	8	Female	alive, living in this HH	alive, living in this HH	grade 2	Good	No	No	No	6	Not indicated	negative
3931	8	Female	alive, other area	alive, other area	grade 2	Good	No	No	No	6	Not indicated	negative
3933	9	Male	alive, living in this HH	alive, living in this HH	grade 3	Good	No	No	No	6	Not indicated	negative
3934	17	Female	alive, living in this HH	alive, living in this HH	form 4	Excellent	No	No	No	6	Not indicated	negative
3935	10	Male	alive, living in this HH	alive, living in this HH	grade 4	Excellent	No	No	No	6	Not indicated	negative
3936	12	Female	alive, living in this HH	alive, living in this HH	grade 6	Good	No	No	No	6	Not indicated	negative
3942	10	Female	alive, living in this HH	alive, living in this HH	grade 5	Good	No	No	No	6	Not indicated	negative
3943	12	Male	alive, another HH	alive, another HH	grade 4	Excellent	No	No	No	6	Not indicated	negative
3944	9	Male	alive, another HH	alive, another HH	grade 4	Excellent	No	No	No	6	Not indicated	negative
3945	8	Female	alive, living in this HH	alive, living in this HH	grade 2	Good	No	No	No	6	Not indicated	negative
3946	10	Female	alive, living in this HH	alive, living in this HH	grade 4	Excellent	No	No	No	6	Not indicated	negative
3947	11	Male	alive, living in this HH	alive, another HH	grade 5	Excellent	No	No	No	6	Not indicated	negative
3948	16	Male	alive, another HH	alive, another HH	form 3	Excellent	No	No	No	6	Not indicated	negative
3949	9	Male	alive, another HH	alive, another HH	grade 3	Good	No	No	No	6	Not indicated	negative
3950	13	Female	alive, living in this HH	alive, living in this HH	grade 7	Good	No	No	No	6	Not indicated	negative
3951	17	Male	alive, another HH	alive, another HH	form 4	Excellent	No	No	No	6	Not indicated	negative
3952	12	Male	alive, living in this HH	alive, living in this HH	grade 6	Excellent	No	No	No	6	Not indicated	negative
3953	12	Female	alive, living in this HH	dead	grade 7	Excellent	No	No	No	6	Not indicated	negative
3954	9	Male	alive, living in this HH	alive, living in this HH	grade 3	Excellent	No	No	No	6	Not indicated	negative
3955	11	Male	alive, living in this HH	alive, living in this HH	grade 6	Good	No	No	Yes	6	Not indicated	negative
3956	11	Male	alive, living in this HH	alive, living in this HH	grade 6	Good	No	No	No	6	Not indicated	negative
3957	15	Female	alive, living in this HH	alive, living in this HH	form 3	Excellent	No	No	No	6	Not indicated	negative
3958	15	Female	alive, living in this HH	dead	form 2	Good	No	No	No	6	Not indicated	negative
3959	9	Male	alive, living in this HH	alive, living in this HH	grade 4	Fair	No	No	No	6	Not indicated	negative
3960	13	Male	alive, living in this HH	alive, living in this HH	form 1	Excellent	No	No	No	6	Not indicated	negative
3961	9	Female	alive, living in this HH	alive, living in this HH	grade 3	Excellent	No	No	No	6	Not indicated	negative
3962	11	Female	alive, living in this HH	alive, living in this HH	grade 6	Excellent	No	No	No	6	Not indicated	negative
3963	14	Male	alive, living in this HH	alive, living in this HH	form 1	Good	No	Yes	No	6	Negative	negative
3964	16	Female	alive, other area	dead	form 2	Excellent	No	No	No	6	Not indicated	negative
3965	10	Male	alive, living in this HH	alive, other area	grade 4	Fair	No	No	No	6	Not indicated	negative
3966	12	Female	alive, other country	alive, another HH	grade 5	Excellent	No	No	No	6	Not indicated	negative
3967	13	Female	alive, other area	alive, living in this HH	grade 7	Good	No	No	No	6	Not indicated	negative
3968	8	Male	alive, living in this HH	dead	grade 1	Fair	No	No	No	6	Not indicated	negative
3969	8	Male	alive, living in this HH	dead	grade 1	Good	No	No	No	6	Not indicated	negative
3970	14	Male	alive, other area	alive, other area	form 1	Good	No	No	No	6	Not indicated	negative
3971	12	Male	alive, living in this HH	alive, another HH	grade 6	Excellent	No	No	No	6	Not indicated	negative
3972	8	Male	alive, other area	alive, living in this HH	0	Fair	No	No	No	6	Not indicated	negative
3973	12	Male	alive, another HH	alive, another HH	grade 5	Excellent	No	No	No	6	Negative	negative
3974	13	Male	alive, living in this HH	alive, living in this HH	grade 7	Good	No	No	No	6	Negative	negative
3975	10	Male	alive, another HH	dead	grade 4	Excellent	No	No	No	6	Not indicated	negative
3976	8	Female	alive, living in this HH	alive, living in this HH	grade 2	Excellent	No	No	No	6	Not indicated	negative
3977	14	Female	alive, other country	alive, other country	form 1	Excellent	No	No	No	6	Not indicated	negative
3979	9	Female	alive, other country	alive, other country	grade 3	Good	No	No	No	6	Not indicated	negative
3980	14	Female	alive, living in this HH	dead	form 2	Excellent	No	No	No	6	Not indicated	negative
3983	12	Female	alive, other area	alive, other area	grade 6	Excellent	No	Yes	No	6	Not indicated	negative
3984	16	Female	alive, living in this HH	alive, living in this HH	form 3	Excellent	No	No	No	6	Not indicated	negative
3985	17	Male	alive, living in this HH	alive, living in this HH	form 4	Excellent	No	No	No	6	Not indicated	negative
3986	13	Female	alive, other area	alive, other area	grade 6	Excellent	No	No	No	6	Not indicated	negative
3987	10	Female	alive, living in this HH	alive, living in this HH	grade 4	Excellent	No	No	No	6	Not indicated	negative
3988	10	Male	alive, other area	alive, other area	grade 4	Good	No	No	No	6	Not indicated	negative
3989	16	Female	alive, living in this HH	alive, living in this HH	form 3	Good	No	No	No	6	Not indicated	negative
3990	9	Female	alive, living in this HH	dead	grade 3	Good	No	No	No	6	Not indicated	negative
3991	9	Male	alive, living in this HH	alive, living in this HH	grade 3	Good	No	No	No	6	Not indicated	negative
3992	8	Male	alive, living in this HH	alive, living in this HH	grade 1	Excellent	No	Yes	No	6	Not indicated	negative
3993	8	Male	alive, living in this HH	alive, living in this HH	grade 1	Fair	No	No	No	6	Not indicated	negative
3994	12	Female	alive, living in this HH	alive, living in this HH	grade 5	Good	No	No	No	6	Not indicated	negative
3995	8	Female	alive, other area	alive, other area	grade 2	Good	No	No	No	6	Not indicated	negative
3996	16	Female	alive, living in this HH	alive, living in this HH	form 3	Excellent	No	No	No	6	Not indicated	negative
3997	11	Female	alive, living in this HH	alive, living in this HH	grade 5	Good	No	No	No	6	Not indicated	negative
3998	14	Female	alive, living in this HH	alive, living in this HH	grade 6	Fair	No	No	No	6	Not indicated	negative
3999	9	Female	alive, living in this HH	alive, living in this HH	grade 3	Excellent	No	No	No	6	Not indicated	negative
4000	13	Male	alive, living in this HH	alive, living in this HH	grade 7	Excellent	No	No	No	6	Negative	negative
4001	13	Female	alive, other country	alive, another HH	grade 7	Good	No	No	No	6	Not indicated	negative
4002	10	Female	alive, living in this HH	alive, living in this HH	grade 4	Excellent	No	No	No	6	Negative	negative
4003	12	Male	alive, living in this HH	alive, living in this HH	grade 6	Excellent	No	No	No	6	Not indicated	negative
4004	13	Male	alive, living in this HH	alive, other country	grade 6	Good	No	No	No	6	Negative	negative
4005	15	Female	dead	dead	grade 7	Good	No	No	No	6	Not indicated	negative
4006	14	Male	alive, another HH	dead	grade 6	Good	No	No	No	6	Not indicated	negative
4007	15	Male	alive, living in this HH	alive, living in this HH	form 1	Excellent	No	No	No	6	Not indicated	negative
4008	9	Female	alive, living in this HH	alive, another HH	grade 3	Good	No	No	No	6	Negative	negative
4009	17	Female	alive, living in this HH	alive, living in this HH	form 4	Excellent	No	No	Yes	6	Negative	negative
4010	11	Female	alive, another HH	dead	grade 4	Good	No	No	No	6	Not indicated	negative
4011	12	Female	alive, living in this HH	alive, living in this HH	grade 5	Good	No	No	No	6	Not indicated	negative
4012	17	Female	dead	dead	form 4	Good	No	No	Yes	6	Negative	negative
4013	17	Female	alive, living in this HH	alive, living in this HH	form 4	Good	No	No	Yes	6	Negative	negative
4014	10	Male	alive, living in this HH	alive, living in this HH	grade 4	Excellent	No	No	No	6	Not indicated	negative
4015	15	Female	alive, another HH	dead	grade 7	Good	No	No	No	6	Not indicated	negative
4016	13	Male	alive, living in this HH	alive, living in this HH	grade 6	Good	No	No	Yes	6	Negative	negative
4019	17	Male	alive, other country	alive, another HH	form 3	Good	No	No	No	6	Not indicated	negative
4020	8	Female	alive, other country	alive, other country	grade 2	Fair	No	Yes	No	6	Not indicated	negative
4021	9	Male	alive, other country	alive, other country	grade 1	Good	No	No	No	6	Not indicated	negative
4022	12	Female	alive, other country	alive, other country	grade 6	Good	No	No	No	6	Not indicated	negative
4023	8	Female	alive, living in this HH	alive, living in this HH	grade 3	Good	No	No	No	6	Not indicated	negative
4024	11	Female	alive, living in this HH	alive, living in this HH	grade 5	Good	No	No	No	6	Not indicated	negative
4025	15	Female	alive, living in this HH	alive, living in this HH	form 2	Good	No	No	No	6	Negative	negative
4026	10	Female	alive, another HH	alive, other country	grade 2	Good	No	No	No	6	Not indicated	negative
4027	14	Female	alive, living in this HH	alive, living in this HH	form 2	Good	No	No	No	6	Negative	negative
4028	15	Female	alive, living in this HH	alive, living in this HH	form 2	Good	No	No	No	6	Not indicated	negative
4030	16	Female	alive, other area	alive, other area	form 3	Good	No	No	No	6	Negative	negative
4032	9	Male	alive, living in this HH	alive, living in this HH	grade 3	Good	No	No	No	6	Not indicated	negative
4033	14	Female	dead	dead	form 2	Good	No	No	No	6	Not indicated	negative
4034	9	Female	dead	dead	grade 3	Good	No	No	No	6	Negative	negative
4035	9	Male	alive, living in this HH	alive, living in this HH	grade 3	Good	No	No	No	6	Not indicated	negative
4038	8	Male	alive, living in this HH	alive, living in this HH	grade 1	Good	No	No	No	6	Not indicated	negative
4042	17	Female	alive, other area	alive, other area	form 2	Excellent	No	No	No	6	Not indicated	negative
4043	12	Female	alive, living in this HH	alive, other country	grade 5	Good	No	No	No	6	Negative	negative
4044	16	Female	alive, living in this HH	alive, living in this HH	form 4	Excellent	No	No	No	6	Not indicated	negative
4045	12	Female	alive, living in this HH	alive, living in this HH	grade 6	Good	No	No	No	6	Not indicated	positive
4046	14	Male	alive, living in this HH	alive, living in this HH	form 1	Excellent	No	No	No	6	Not indicated	negative
4047	10	Male	alive, living in this HH	alive, other area	grade 4	Excellent	No	No	No	6	Not indicated	negative
4048	17	Male	alive, living in this HH	alive, living in this HH	form 3	Excellent	No	No	No	6	Not indicated	negative
4049	10	Female	alive, living in this HH	alive, living in this HH	grade 2	Excellent	No	No	No	6	Not indicated	negative
4050	17	Female	alive, another HH	alive, another HH	form 3	Excellent	No	No	No	6	Not indicated	negative
4051	15	Female	alive, another HH	alive, another HH	form 1	Excellent	No	No	No	6	Not indicated	negative
4052	17	Female	alive, other area	alive, other area	form 4	Excellent	No	No	No	6	Not indicated	negative
4053	12	Female	alive, living in this HH	alive, living in this HH	grade 6	Excellent	No	No	No	6	Not indicated	negative
4055	14	Female	alive, living in this HH	alive, other area	form 1	Good	No	No	No	6	Not indicated	negative
4056	12	Male	alive, living in this HH	alive, living in this HH	grade 6	Excellent	No	No	No	6	Not indicated	negative
4057	13	Female	alive, living in this HH	alive, living in this HH	form 1	Excellent	No	No	No	6	Not indicated	negative
4058	12	Female	alive, living in this HH	alive, living in this HH	grade 6	Excellent	No	No	No	6	Negative	negative
4060	9	Male	alive, living in this HH	alive, living in this HH	grade 3	Excellent	No	No	No	6	Not indicated	negative
4061	12	Female	alive, living in this HH	alive, living in this HH	grade 6	Excellent	No	No	No	6	Not indicated	negative
4062	17	Female	alive, other country	alive, other country	form 4	Excellent	No	No	No	6	Not indicated	negative
4063	8	Male	alive, living in this HH	alive, living in this HH	grade 3	Good	No	No	No	6	Not indicated	negative
4064	15	Female	alive, living in this HH	alive, living in this HH	form 1	Excellent	No	No	No	6	Not indicated	negative
4065	10	Female	alive, living in this HH	alive, living in this HH	grade 5	Good	No	No	No	6	Not indicated	negative
4066	15	Female	alive, living in this HH	alive, living in this HH	form 1	Good	No	No	No	6	Negative	negative
4067	15	Female	alive, other area	alive, other area	form 2	Excellent	No	No	No	6	Not indicated	negative
4068	12	Male	alive, living in this HH	alive, living in this HH	grade 7	Good	No	No	No	6	Not indicated	negative
4069	10	Female	alive, living in this HH	alive, living in this HH	grade 4	Excellent	No	No	Yes	6	Not indicated	negative
4070	10	Female	alive, living in this HH	alive, living in this HH	grade 5	Excellent	No	No	No	6	Not indicated	negative
4071	10	Male	alive, living in this HH	alive, living in this HH	grade 5	Good	No	No	No	6	Not indicated	negative
4072	11	Female	alive, other country	alive, other country	grade 5	Good	No	No	No	6	Not indicated	negative
4073	17	Male	alive, living in this HH	alive, living in this HH	form 4	Excellent	No	No	No	6	Negative	negative
4074	12	Female	alive, living in this HH	alive, living in this HH	grade 7	Good	No	No	No	6	Negative	negative
4075	10	Male	alive, other country	dead	grade 5	Excellent	No	No	No	6	Not indicated	negative
4076	9	Male	alive, other country	dead	grade 3	Good	No	No	No	6	Not indicated	negative
4077	9	Female	alive, living in this HH	alive, living in this HH	grade 6	Good	No	No	No	6	Not indicated	negative
4078	10	Male	alive, living in this HH	alive, living in this HH	grade 5	Good	No	No	No	6	Not indicated	negative
4811	15	Female	alive, living in this HH	alive, living in this HH	grade 6	Good	No	No	No	6	Not indicated	negative
4812	12	Male	alive, living in this HH	alive, living in this HH	grade 5	Excellent	No	No	No	6	Not indicated	negative
4813	9	Female	alive, living in this HH	alive, living in this HH	grade 3	Excellent	No	No	No	6	Not indicated	negative
4814	16	Male	alive, living in this HH	alive, other country	form 4	Good	No	No	No	6	Not indicated	negative
4815	15	Female	alive, other area	alive, another HH	grade 7	Good	No	No	No	6	Not indicated	negative
4817	8	Female	alive, other country	alive, other area	grade 2	Good	No	No	No	6	Not indicated	negative
4820	12	Female	alive, other country	alive, other area	grade 6	Good	No	No	No	6	Not indicated	negative
4824	8	Male	alive, living in this HH	alive, living in this HH	grade 2	Good	No	No	No	6	Not indicated	negative
4825	8	Female	alive, living in this HH	dead	grade 3	Good	No	No	No	6	Not indicated	negative
4826	11	Female	alive, other area	alive, other area	grade 5	Good	No	No	No	6	Not indicated	negative
4827	10	Female	alive, living in this HH	alive, living in this HH	grade 3	Good	No	No	No	6	Not indicated	negative
4828	8	Male	alive, living in this HH	alive, living in this HH	grade 2	Excellent	No	No	No	6	Not indicated	negative
4829	8	Male	alive, living in this HH	alive, living in this HH	grade 3	Excellent	No	No	No	6	Not indicated	negative
4830	12	Female	alive, living in this HH	alive, living in this HH	grade 6	Excellent	No	No	No	6	Not indicated	negative
4831	9	Female	alive, other country	alive, other country	grade 2	Excellent	No	No	No	6	Not indicated	negative
4832	11	Female	alive, another HH	dead	grade 5	Good	No	No	No	6	Not indicated	negative
4833	9	Male	alive, living in this HH	alive, living in this HH	grade 3	Good	No	No	No	6	Not indicated	negative
4834	12	Female	alive, other country	alive, other country	grade 5	Good	No	No	No	6	Negative	negative
4835	10	Male	alive, living in this HH	alive, living in this HH	grade 4	Good	No	No	No	6	Not indicated	negative
4836	9	Male	alive, living in this HH	alive, living in this HH	grade 3	Excellent	No	No	No	6	Not indicated	negative
4837	9	Male	alive, living in this HH	alive, living in this HH	grade 3	Excellent	No	No	No	6	Not indicated	negative
4838	8	Female	alive, other country	alive, living in this HH	grade 1	Good	No	No	No	6	Not indicated	negative
4839	10	Male	alive, living in this HH	alive, living in this HH	grade 4	Good	No	No	No	6	Not indicated	negative
4840	8	Female	alive, living in this HH	alive, living in this HH	grade 1	Good	No	No	No	6	Not indicated	negative
4841	8	Female	alive, living in this HH	alive, living in this HH	grade 3	Good	No	No	No	6	Not indicated	negative
4842	16	Female	alive, living in this HH	alive, living in this HH	grade 6	Good	No	No	No	6	Negative	negative
4843	13	Male	alive, living in this HH	alive, living in this HH	form 1	Excellent	No	Yes	No	6	Negative	negative
4844	8	Female	alive, living in this HH	alive, other area	grade 2	Good	No	No	No	6	Not indicated	negative
4845	17	Male	alive, living in this HH	dead	form 1	Fair	No	No	No	6	Not indicated	negative
4846	9	Female	alive, another HH	alive, another HH	grade 4	Good	No	No	No	6	Not indicated	negative
4847	10	Female	alive, living in this HH	alive, living in this HH	grade 4	Excellent	No	Yes	No	6	Negative	negative
4848	10	Female	alive, another HH	dead	grade 5	Good	No	No	No	6	Not indicated	negative
4849	8	Male	dead	dead	grade 3	Good	Yes	Yes	No	6	Negative	negative
4850	14	Male	alive, living in this HH	alive, living in this HH	form 1	Good	No	No	No	6	Not indicated	negative
4851	17	Female	alive, other area	alive, another HH	form 4	Excellent	No	No	Yes	6	Not indicated	negative
4853	11	Female	dead	alive, other area	grade 4	Good	No	No	No	6	Not indicated	negative
4854	10	Female	alive, other country	alive, other area	grade 4	Good	No	No	No	6	Negative	negative
4855	17	Female	alive, living in this HH	alive, other country	form 4	Excellent	No	No	No	6	Not indicated	negative
4856	9	Female	alive, another HH	alive, another HH	grade 4	Excellent	No	No	No	6	Not indicated	negative
4857	9	Female	alive, living in this HH	alive, living in this HH	grade 3	Excellent	No	No	No	6	Not indicated	negative
4858	14	Female	alive, living in this HH	alive, living in this HH	form 1	Excellent	No	No	No	6	Not indicated	negative
4859	17	Female	alive, living in this HH	alive, living in this HH	form 4	Good	No	No	No	6	Not indicated	negative
4860	16	Female	dead	dead	form 3	Good	No	No	No	6	Not indicated	positive
4861	13	Female	alive, other country	dead	grade 6	Excellent	No	No	No	6	Not indicated	negative
4862	8	Male	alive, living in this HH	alive, living in this HH	grade 2	Excellent	No	No	No	6	Not indicated	negative
4863	9	Female	alive, living in this HH	alive, living in this HH	grade 3	Good	No	No	No	6	Not indicated	negative
4864	13	Female	alive, living in this HH	alive, living in this HH	form 1	Good	No	No	No	6	Not indicated	negative
4865	16	Male	alive, living in this HH	alive, living in this HH	form 2	Excellent	No	No	Yes	6	Not indicated	negative
4866	8	Male	alive, living in this HH	alive, another HH	grade 3	Good	No	No	No	6	Not indicated	negative
4867	17	Male	alive, living in this HH	alive, living in this HH	form 4	Good	No	No	No	6	Not indicated	negative
4868	10	Male	alive, living in this HH	alive, living in this HH	grade 4	Good	No	No	No	6	Not indicated	negative
4869	9	Female	alive, living in this HH	alive, living in this HH	grade 5	Good	No	No	No	6	Not indicated	negative
4870	12	Male	alive, living in this HH	alive, living in this HH	grade 7	Good	No	No	No	6	Not indicated	negative
4871	8	Male	alive, living in this HH	alive, living in this HH	grade 3	Good	No	No	No	6	Not indicated	negative
4872	10	Male	alive, other country	alive, living in this HH	grade 5	Good	No	No	No	6	Not indicated	negative
4873	13	Female	alive, living in this HH	alive, living in this HH	grade 7	Good	No	No	No	6	Not indicated	negative
4874	10	Female	alive, living in this HH	alive, living in this HH	grade 4	Good	No	No	No	6	Not indicated	negative
4875	11	Male	alive, living in this HH	alive, living in this HH	grade 4	Good	No	No	No	6	Not indicated	negative
4876	9	Male	alive, living in this HH	alive, living in this HH	grade 2	Good	No	No	No	6	Not indicated	negative
4877	8	Male	alive, living in this HH	alive, living in this HH	grade 2	Good	No	No	No	6	Not indicated	negative
4878	17	Female	alive, other area	alive, other area	form 4	Excellent	No	No	No	6	Not indicated	negative
4879	16	Female	alive, living in this HH	alive, living in this HH	form 3	Excellent	No	No	No	6	Not indicated	negative
4880	9	Female	alive, living in this HH	alive, living in this HH	grade 3	Excellent	No	No	No	6	Not indicated	negative
4881	16	Female	alive, living in this HH	alive, living in this HH	form 4	Excellent	No	No	No	6	Negative	negative
4882	11	Male	alive, living in this HH	alive, living in this HH	grade 5	Good	No	No	No	6	Not indicated	negative
4883	11	Female	alive, living in this HH	alive, living in this HH	grade 5	Excellent	No	No	No	6	Not indicated	negative
4884	13	Female	alive, living in this HH	alive, living in this HH	grade 7	Excellent	No	No	No	6	Not indicated	negative
4885	9	Male	alive, living in this HH	alive, living in this HH	grade 3	Excellent	No	No	No	6	Not indicated	negative
4886	11	Female	alive, living in this HH	dead	grade 4	Good	No	No	No	6	Not indicated	negative
4887	14	Female	alive, living in this HH	alive, living in this HH	form 1	Good	No	No	No	6	Not indicated	negative
4888	13	Female	alive, living in this HH	alive, living in this HH	grade 7	Good	No	Yes	No	6	Not indicated	negative
4889	15	Female	alive, living in this HH	alive, living in this HH	form 2	Excellent	No	No	No	6	Not indicated	negative
4890	13	Male	alive, living in this HH	alive, living in this HH	grade 7	Excellent	No	No	No	6	Not indicated	negative
4891	17	Male	alive, living in this HH	alive, living in this HH	form 4	Excellent	No	No	No	6	Not indicated	negative
4892	17	Female	alive, living in this HH	alive, living in this HH	form 3	Good	No	No	No	6	Not indicated	negative
4893	9	Male	alive, living in this HH	alive, living in this HH	grade 3	Good	No	No	No	6	Not indicated	negative
4895	10	Male	alive, living in this HH	alive, living in this HH	grade 5	Excellent	No	No	No	6	Not indicated	negative
4896	14	Male	alive, living in this HH	alive, living in this HH	form 2	Good	No	No	No	6	Not indicated	negative
4897	14	Male	alive, living in this HH	alive, living in this HH	form 1	Good	No	No	No	6	Negative	negative
4898	13	Female	alive, living in this HH	alive, living in this HH	grade 5	Good	No	No	No	6	Not indicated	negative
4899	13	Female	alive, living in this HH	alive, living in this HH	form 2	Excellent	No	No	No	6	Negative	negative
4900	8	Female	alive, living in this HH	alive, living in this HH	grade 3	Excellent	No	No	No	6	Not indicated	negative
4902	8	Male	alive, other area	alive, other area	grade 2	Good	No	No	No	6	Not indicated	negative
4903	9	Female	alive, living in this HH	alive, living in this HH	grade 3	Good	No	No	No	6	Not indicated	negative
4905	11	Female	alive, other area	alive, living in this HH	grade 5	Good	No	No	No	6	Not indicated	negative
4906	13	Male	alive, living in this HH	alive, other country	form 1	Good	No	No	No	6	Not indicated	negative
4907	17	Female	alive, living in this HH	dead	form 4	Good	No	No	No	6	Not indicated	negative
4908	17	Female	alive, living in this HH	alive, living in this HH		Excellent	No	No	No	6	Not indicated	negative
4909	15	Male	alive, living in this HH	alive, living in this HH	form 2	Excellent	No	No	No	6	Not indicated	negative
4910	10	Male	alive, living in this HH	alive, living in this HH	grade 4	Excellent	No	No	No	6	Not indicated	negative
4914	15	Female	alive, living in this HH	dead	form 2	Fair	No	No	No	6	Not indicated	negative
4915	13	Female	alive, living in this HH	alive, living in this HH	form 1	Good	No	No	No	6	Not indicated	negative
4916	8	Male	alive, other area	alive, other area	grade 2	Excellent	No	No	No	6	Not indicated	negative
4917	14	Male	alive, living in this HH	alive, other area	form 2	Excellent	No	No	No	6	Not indicated	negative
4918	14	Female	alive, living in this HH	alive, living in this HH	form 1	Excellent	No	No	No	6	Not indicated	negative
4919	9	Male	alive, living in this HH	alive, living in this HH	grade 2	Excellent	No	No	No	6	Not indicated	negative
4920	8	Female	alive, living in this HH	alive, other area	grade 2	Excellent	No	No	No	6	Not indicated	negative
4921	12	Male	alive, living in this HH	alive, other country	grade 6	Excellent	No	No	No	6	Not indicated	negative
4922	10	Male	alive, living in this HH	alive, living in this HH	grade 3	Excellent	No	No	No	6	Not indicated	negative
4923	14	Female	alive, living in this HH	alive, living in this HH	form 1	Excellent	No	No	No	6	Not indicated	negative
4924	9	Female	alive, other country	alive, other country	grade 3	Good	No	No	No	6	Not indicated	negative
4925	10	Male	alive, living in this HH	alive, living in this HH	grade 3	Good	No	No	No	6	Not indicated	negative
4926	11	Female	alive, living in this HH	alive, living in this HH	grade 5	Good	No	No	No	6	Not indicated	negative
4928	9	Male	alive, living in this HH	alive, living in this HH	grade 3	Good	No	No	No	6	Not indicated	negative
4930	16	Female	alive, living in this HH	alive, living in this HH	form 3	Excellent	No	No	No	6	Not indicated	negative
4933	14	Male	alive, living in this HH	alive, living in this HH	form 1	Excellent	No	No	No	6	Not indicated	negative
4935	15	Female	alive, living in this HH	alive, living in this HH	form 2	Good	No	No	No	6	Not indicated	negative
4936	12	Male	alive, living in this HH	alive, living in this HH	grade 6	Good	No	No	No	6	Not indicated	negative
4937	10	Female	alive, living in this HH	alive, living in this HH	grade 5	Excellent	No	No	No	6	Negative	negative
4938	9	Female	alive, other country	alive, other country	grade 3	Good	No	No	No	6	Not indicated	negative
4939	12	Male	alive, other country	alive, other country	grade 6	Good	No	No	No	6	Not indicated	negative
4940	10	Male	alive, another HH	alive, living in this HH	grade 2	Good	No	No	No	6	Not indicated	negative
4941	9	Female	alive, other country	alive, other country	grade 3	Good	No	No	No	6	Not indicated	negative
4942	15	Male	alive, living in this HH	dead	form 3	Good	No	No	No	6	Negative	negative
4943	9	Female	alive, living in this HH	alive, other area	grade 4	Good	No	No	No	6	Not indicated	negative
4944	12	Female	alive, other country	alive, other country	grade 7	Excellent	No	No	No	6	Not indicated	negative
4945	17	Male	alive, living in this HH	alive, living in this HH	form 4	Excellent	No	No	No	6	Negative	negative
4947	17	Female	alive, other area	dead	form 4	Good	No	No	No	6	Negative	negative
4948	15	Male	alive, other country	alive, living in this HH	form 3	Excellent	No	No	No	6	Not indicated	negative
4950	17	Male	alive, living in this HH	alive, living in this HH	form 5	Excellent	No	No	No	6	Not indicated	negative
4951	11	Male	alive, living in this HH	dead	grade 5	Good	No	Yes	No	6	Negative	negative
4952	16	Male	alive, living in this HH	alive, living in this HH	form 3	Good	No	No	No	6	Not indicated	negative
4953	14	Female	alive, living in this HH	alive, living in this HH	form 3	Excellent	No	No	No	6	Not indicated	negative
4954	15	Female	dead	dead	grade 5	Good	No	No	No	6	Negative	negative
4956	9	Male	alive, living in this HH	alive, living in this HH	grade 3	Good	No	No	No	6	Not indicated	negative
4961	11	Female	alive, living in this HH	alive, living in this HH	grade 5	Good	No	Yes	No	6	Not indicated	negative
4963	17	Male	alive, living in this HH	alive, living in this HH	form 4	Good	No	No	No	6	Negative	negative
4967	17	Female	alive, another HH	dead	form 3	Excellent	No	No	No	7	Not indicated	negative
4969	8	Male	alive, living in this HH	alive, living in this HH	grade 4	Excellent	No	Yes	No	6	Not indicated	negative
4970	11	Male	alive, living in this HH	alive, living in this HH	grade 6	Good	No	No	No	6	Not indicated	negative
5162	10	Male	alive, living in this HH	alive, living in this HH	grade 3	Good	No	No	No	6	Negative	negative
5163	12	Female	alive, living in this HH	alive, living in this HH	grade 2	Good	No	Yes	No	6	Negative	negative
5164	8	Female	alive, another HH	alive, another HH	grade 2	Good	No	No	No	6	Not indicated	negative
5168	8	Male	alive, another HH	dead	grade 1	Good	No	No	No	6	Not indicated	negative
5169	13	Male	alive, living in this HH	alive, living in this HH	grade 5	Good	No	No	No	6	Negative	negative
5172	17	Female	alive, other area	alive, other area	grade 7	Good	No	No	No	6	Negative	negative
5175	9	Female	alive, living in this HH	alive, living in this HH	grade 4	Good	No	No	No	6	Not indicated	negative
5180	9	Male	alive, other country	alive, other area	grade 3	Excellent	No	Yes	No	7	Not indicated	negative
5181	9	Female	alive, living in this HH	dead	grade 3	Excellent	No	No	No	6	Not indicated	negative
5182	9	Female	alive, living in this HH	alive, living in this HH	grade 4	Good	No	No	Yes	6	Not indicated	negative
5183	13	Female	alive, living in this HH	alive, living in this HH	form 1	Good	No	No	No	6	Not indicated	negative
5184	16	Female	alive, living in this HH	alive, living in this HH	form 4	Excellent	No	No	No	6	Not indicated	negative
5185	11	Male	alive, living in this HH	alive, living in this HH	grade 6	Excellent	No	No	No	6	Not indicated	negative
5186	17	Male	alive, living in this HH	alive, living in this HH	form 4	Excellent	No	No	No	6	Not indicated	negative
5187	13	Female	alive, other area	dead	grade 7	Good	No	No	Yes	7	Not indicated	negative
5189	17	Female	dead	dead	grade 7	Excellent	No	Yes	No	7	Not indicated	negative
5190	13	Female	alive, living in this HH	alive, living in this HH	grade 7	Excellent	No	No	No	7	Not indicated	negative
5191	9	Male	alive, living in this HH	alive, living in this HH	grade 3	Good	No	No	No	6	Not indicated	negative
5192	13	Male	alive, living in this HH	dead	grade 7	Excellent	No	No	No	7	Not indicated	negative
5194	12	Male	dead	dead	grade 6	Good	No	No	No	7	Not indicated	negative
5195	10	Female	alive, other area	alive, other area	grade 4	Excellent	No	No	No	7	Not indicated	negative
5196	13	Female	alive, living in this HH	alive, living in this HH	form 1	Excellent	No	No	No	7	Not indicated	negative
5197	9	Female	alive, living in this HH	dead	grade 3	Good	No	No	No	7	Not indicated	negative
5198	11	Male	alive, living in this HH	alive, living in this HH	grade 6	Excellent	No	No	No	7	Not indicated	negative
5200	9	Male	alive, living in this HH	alive, living in this HH	grade 3	Good	No	No	No	7	Not indicated	negative
5201	10	Male	alive, another HH	alive, another HH	grade 4	Good	No	Yes	No	7	Negative	negative
5204	13	Male	alive, living in this HH	alive, living in this HH	grade 7	Good	No	No	No	6	Not indicated	negative
5207	15	Female	alive, other area	dead	grade 7	Good	No	No	No	6	Negative	negative
5209	10	Female	alive, living in this HH	alive, living in this HH	grade 5	Excellent	No	No	No	6	Not indicated	negative
5210	12	Female	alive, living in this HH	alive, living in this HH	grade 7	Good	No	No	No	6	Not indicated	negative
5211	8	Male	alive, another HH	alive, other country	grade 2	Good	No	No	No	6	Not indicated	negative
5212	12	Male	alive, living in this HH	alive, another HH	grade 5	Excellent	No	No	No	6	Not indicated	negative
5213	9	Female	alive, living in this HH	alive, living in this HH	grade 3	Excellent	No	No	No	7	Not indicated	negative
5214	8	Female	alive, living in this HH	alive, living in this HH	grade 3	Excellent	No	No	No	6	Not indicated	negative
5215	16	Female	alive, other area	alive, other area	form 3	Excellent	No	No	No	7	Not indicated	negative
5216	10	Male	alive, living in this HH	alive, living in this HH	grade 4	Good	No	No	No	6	Not indicated	negative
5217	12	Male	alive, living in this HH	alive, living in this HH	grade 4	Excellent	No	No	No	7	Not indicated	negative
5218	11	Male	alive, living in this HH	alive, another HH	grade 4	Excellent	No	No	No	6	Not indicated	negative
5219	12	Male	alive, living in this HH	alive, living in this HH	grade 4	Excellent	No	No	No	7	Not indicated	negative
5223	12	Male	alive, living in this HH	alive, living in this HH	grade 6	Good	No	Yes	No	6	Not indicated	negative
5224	8	Male	alive, another HH	alive, another HH	grade 1	Excellent	No	No	No	7	Not indicated	negative
5225	9	Female	alive, living in this HH	alive, another HH	grade 3	Good	No	No	No	6	Not indicated	negative
5226	10	Female	alive, living in this HH	alive, living in this HH	grade 3	Excellent	No	No	No	6	Not indicated	negative
5227	12	Female	alive, living in this HH	alive, living in this HH	grade 6	Good	No	No	No	7	Not indicated	negative
5228	8	Female	alive, living in this HH	alive, living in this HH	grade 3	Good	No	No	No	6	Not indicated	negative
5229	10	Female	alive, living in this HH	alive, living in this HH	grade 5	Fair	No	No	No	6	Not indicated	negative
5231	13	Male	alive, living in this HH	dead	grade 6	Good	No	No	No	6	Not indicated	negative
5233	15	Female	alive, living in this HH	alive, living in this HH	form 2	Good	No	No	No	6	Not indicated	negative
5234	13	Female	alive, living in this HH	alive, living in this HH	form 1	Excellent	No	No	No	6	Not indicated	negative
5235	9	Female	alive, living in this HH	alive, living in this HH	grade 4	Excellent	No	No	No	6	Not indicated	negative
5236	10	Male	alive, living in this HH	alive, living in this HH	grade 4	Good	No	No	No	6	Not indicated	negative
5237	11	Female	alive, other country	alive, other country	grade 5	Good	No	No	No	6	Not indicated	negative
5238	15	Male	alive, living in this HH	alive, living in this HH	form 1	Good	No	No	No	6	Not indicated	negative
5239	10	Female	alive, living in this HH	alive, living in this HH	grade 3	Good	No	No	No	6	Not indicated	negative
5246	14	Male	alive, another HH	dead	form 1	Fair	No	No	No	7	Not indicated	negative
5250	10	Female	alive, living in this HH	alive, living in this HH	grade 5	Excellent	No	No	No	6	Negative	negative
5251	13	Female	dead	dead	grade 6	Good	No	No	No	7	Not indicated	negative
5252	13	Male	alive, other area	alive, other area	grade 5	Good	No	No	No	6	Negative	negative
5253	16	Female	alive, living in this HH	alive, other area	form 1	Good	No	No	No	7	Not indicated	negative
5254	8	Male	alive, living in this HH	alive, living in this HH	grade 2	Good	No	No	No	7	Not indicated	negative
5256	16	Female	dead	don't know	form 3	Excellent	No	No	No	7	Not indicated	negative
5257	12	Female	alive, living in this HH	alive, another HH	grade 6	Excellent	No	No	No	7	Not indicated	negative
5258	15	Female	alive, living in this HH	alive, other country	form 1	Excellent	No	No	No	7	Not indicated	negative
5259	10	Female	alive, living in this HH	alive, living in this HH	grade 4	Good	No	No	No	7	Not indicated	negative
5260	12	Female	alive, living in this HH	alive, other country	grade 5	Excellent	No	No	Yes	7	Not indicated	negative
5261	16	Male	alive, other country	dead	form 2	Excellent	No	No	No	7	Not indicated	negative
5262	17	Male	alive, other country	alive, other country	form 3	Good	No	No	No	7	Not indicated	negative
5263	14	Male	alive, other area	dead	grade 5	Excellent	No	No	Yes	7	Not indicated	negative
5264	17	Female	alive, other country	alive, another HH	form 4	Fair	No	No	No	7	Negative	negative
5265	17	Female	alive, other area	alive, living in this HH	form 4	Excellent	No	No	No	7	Not indicated	negative
5266	13	Male	alive, other area	alive, living in this HH	grade 7	Excellent	No	No	No	7	Not indicated	negative
5273	17	Female	alive, living in this HH	alive, living in this HH	form 4	Excellent	No	No	No	6	Not indicated	negative
5274	9	Male	alive, another HH	alive, another HH	grade 3	Excellent	No	No	No	6	Not indicated	negative
5275	12	Male	dead	dead	grade 5	Good	No	Yes	No	6	Positive	positive
5276	9	Male	alive, living in this HH	alive, living in this HH	grade 2	Excellent	No	No	No	6	Not indicated	negative
5277	9	Male	alive, living in this HH	alive, living in this HH	grade 3	Excellent	No	No	No	6	Not indicated	negative
5278	12	Female	alive, living in this HH	alive, living in this HH	grade 5	Excellent	No	No	No	6	Not indicated	negative
5284	15	Female	alive, living in this HH	alive, living in this HH	form 2	Fair	No	Yes	No	7	Not indicated	negative
5285	10	Female	alive, living in this HH	alive, living in this HH	grade 4	Good	No	No	No	7	Not indicated	negative
5286	12	Female	alive, living in this HH	alive, living in this HH	grade 6	Good	No	No	No	7	Not indicated	negative
5287	13	Female	alive, living in this HH	dead	grade 6	Excellent	No	No	No	7	Negative	negative
5288	13	Female	alive, living in this HH	alive, other area	grade 6	Excellent	No	No	No	7	Not indicated	negative
5289	12	Female	alive, living in this HH	alive, living in this HH	grade 6	Excellent	No	No	No	7	Not indicated	negative
5290	12	Female	alive, living in this HH	alive, other area	grade 6	Excellent	No	No	No	7	Not indicated	negative
5291	15	Female	alive, living in this HH	alive, other area	form 2	Good	No	No	No	7	Negative	negative
5292	17	Male	alive, other country	alive, other country	form 4	Good	No	No	No	7	Not indicated	negative
5293	13	Female	alive, other country	alive, other country	grade 7	Excellent	No	No	No	7	Not indicated	negative
5294	9	Male	alive, other country	alive, other country	grade 2	Good	No	No	No	7	Not indicated	negative
5295	17	Male	alive, other area	dead	form 4	Good	No	No	No	7	Not indicated	negative
5296	17	Male	dead	alive, living in this HH	grade 7	Fair	No	Yes	No	7	Negative	negative
5297	14	Male	alive, living in this HH	dead	form 1	Good	No	No	No	7	Not indicated	negative
5298	15	Male	alive, living in this HH	alive, living in this HH	grade 7	Good	No	No	No	7	Not indicated	negative
5301	16	Male	alive, living in this HH	alive, living in this HH	form 3	Excellent	No	No	No	7	Negative	negative
5302	9	Female	alive, living in this HH	alive, other country	grade 2	Excellent	No	No	No	7	Not indicated	negative
5303	13	Female	dead	alive, another HH	grade 5	Excellent	No	No	No	7	Not indicated	negative
5304	17	Male	alive, living in this HH	alive, other area	form 4	Excellent	No	No	No	7	Negative	negative
5305	16	Male	alive, living in this HH	alive, living in this HH	form 3	Excellent	No	No	No	7	Not indicated	negative
5306	11	Female	alive, another HH	dead	grade 4	Excellent	No	No	No	7	Not indicated	negative
5307	11	Male	alive, living in this HH	alive, living in this HH	grade 5	Excellent	No	No	No	7	Not indicated	negative
5308	8	Male	alive, living in this HH	alive, living in this HH	grade 1	Excellent	No	No	No	7	Not indicated	negative
5309	11	Female	alive, living in this HH	alive, other country	grade 5	Excellent	No	No	No	7	Not indicated	negative
5310	13	Female	alive, living in this HH	alive, another HH	grade 7	Excellent	No	No	Yes	7	Not indicated	negative
5313	12	Male	alive, living in this HH	alive, living in this HH	grade 6	Good	No	No	No	7	Not indicated	negative
5314	15	Male	dead	alive, living in this HH	grade 7	Good	No	No	No	7	Not indicated	negative
5316	15	Female	alive, living in this HH	alive, living in this HH	form 2	Good	No	No	No	7	Negative	negative
5317	9	Male	alive, living in this HH	alive, living in this HH	grade 3	Good	No	No	No	7	Not indicated	negative
5318	15	Female	alive, other area	alive, other area	form 2	Good	No	No	No	7	Negative	negative
5319	13	Female	alive, other area	alive, other area	grade 7	Good	No	No	No	7	Not indicated	negative
5350	14	Female	alive, other area	alive, other area		Excellent	No	No	No	7	Not indicated	negative
5351	17	Male	alive, living in this HH	alive, living in this HH	form 4	Excellent	No	Yes	No	7	Negative	negative
5352	12	Female	alive, living in this HH	alive, living in this HH	grade 6	Excellent	No	No	No	7	Not indicated	negative
5353	16	Female	alive, living in this HH	alive, another HH	form 3	Excellent	No	No	Yes	7	Negative	negative
5354	13	Female	alive, living in this HH	alive, another HH	grade 6	Excellent	No	No	No	7	Not indicated	negative
5355	14	Female	alive, other area	alive, living in this HH	grade 7	Excellent	No	No	No	7	Not indicated	negative
5357	16	Female	alive, living in this HH	dead	form 2	Fair	No	Yes	Yes	7	Negative	negative
5358	14	Female	alive, another HH	alive, another HH	form 1	Good	No	No	No	7	Negative	negative
5359	13	Male	alive, living in this HH	dead	grade 7	Good	No	No	No	7	Not indicated	negative
5360	16	Female	alive, other country	alive, another HH	form 3	Excellent	No	No	Yes	7	Not indicated	negative
5361	15	Female	alive, other country	dead	form 2	Excellent	No	No	Yes	7	Not indicated	negative
5362	13	Male	alive, another HH	alive, another HH	grade 7	Excellent	No	No	No	7	Not indicated	negative
5363	9	Male	alive, other country	alive, another HH	grade 3	Excellent	No	No	No	7	Not indicated	negative
5364	17	Female	alive, living in this HH	alive, living in this HH	form 3	Excellent	No	Yes	Yes	7	Not indicated	negative
5365	12	Female	alive, living in this HH	alive, living in this HH	grade 6	Good	No	No	No	7	Not indicated	negative
5366	16	Female	alive, another HH	alive, another HH	form 3	Good	No	No	Yes	7	Not indicated	negative
5367	10	Female	alive, other area	dead	grade 3	Good	No	No	No	7	Not indicated	negative
5368	10	Female	alive, living in this HH	alive, another HH	grade 4	Good	No	Yes	No	7	Negative	negative
5369	16	Female	alive, living in this HH	alive, other country	form 3	Excellent	No	No	No	7	Not indicated	negative
5374	16	Male	alive, another HH	dead	form 3	Excellent	No	No	Yes	7	Not indicated	negative
5375	9	Female	alive, living in this HH	alive, living in this HH	grade 3	Good	No	No	No	7	Not indicated	negative
5380	14	Male	alive, living in this HH	alive, living in this HH	form 1	Excellent	No	No	No	7	Not indicated	negative
5383	9	Male	alive, living in this HH	alive, living in this HH	grade 3	Good	No	No	No	7	Not indicated	negative
5384	8	Female	alive, other area	alive, other area	grade 2	Good	No	No	No	7	Negative	negative
5385	14	Male	alive, another HH	alive, another HH	form 1	Good	No	No	No	7	Not indicated	negative
5386	10	Male	alive, another HH	alive, another HH	grade 4	Good	No	No	No	7	Not indicated	negative
5387	8	Female	alive, another HH	alive, another HH	0	Excellent	No	No	No	7	Not indicated	negative
5388	8	Female	alive, living in this HH	alive, living in this HH	grade 1	Good	No	No	No	7	Not indicated	negative
5389	8	Male	dead	dead	grade 1	Good	No	No	Yes	7	Not indicated	negative
5394	14	Male	alive, other area	alive, living in this HH	form 1	Excellent	No	No	No	7	Not indicated	negative
5398	11	Male	alive, living in this HH	alive, living in this HH	grade 5	Excellent	No	No	No	7	Not indicated	negative
5404	8	Female	alive, living in this HH	alive, living in this HH		Excellent	No	No	No	7	Negative	negative
5405	15	Male	alive, living in this HH	alive, living in this HH	form 2	Good	No	No	No	7	Negative	negative
5406	10	Male	alive, living in this HH	alive, living in this HH	grade 4	Excellent	No	No	No	7	Not indicated	negative
5407	14	Male	alive, living in this HH	alive, living in this HH	form 1	Excellent	No	No	No	7	Not indicated	negative
5408	15	Male	alive, living in this HH	dead	form 2	Excellent	No	No	No	7	Not indicated	negative
5409	14	Female	alive, living in this HH	alive, living in this HH	form 1	Good	No	No	No	7	Not indicated	negative
5410	16	Female	alive, living in this HH	alive, living in this HH	form 3	Excellent	No	No	No	7	Not indicated	negative
5411	12	Male	alive, living in this HH	alive, living in this HH	grade 6	Excellent	No	No	No	7	Not indicated	negative
5412	8	Male	alive, living in this HH	alive, other area	grade 3	Excellent	No	No	No	7	Not indicated	negative
5413	13	Male	alive, living in this HH	alive, living in this HH	grade 7	Excellent	No	No	No	7	Not indicated	negative
5414	10	Male	alive, living in this HH	alive, living in this HH	grade 4	Good	No	No	No	7	Not indicated	negative
5415	9	Male	alive, living in this HH	alive, living in this HH	grade 3	Excellent	No	No	No	7	Negative	negative
5416	17	Female	dead	alive, another HH	form 2	Excellent	No	No	No	7	Negative	negative
5418	13	Female	alive, living in this HH	alive, living in this HH	grade 7	Excellent	No	No	No	7	Not indicated	negative
5419	9	Male	alive, living in this HH	alive, living in this HH	grade 2	Good	No	No	No	7	Not indicated	negative
5420	16	Female	alive, living in this HH	alive, living in this HH	form 2	Excellent	No	No	No	7	Not indicated	negative
5421	15	Male	alive, other country	alive, other country	form 2	Excellent	No	No	No	7	Negative	negative
5422	14	Male	dead	alive, living in this HH	grade 7	Good	No	No	No	7	Not indicated	negative
5423	17	Female	alive, another HH	alive, another HH		Excellent	No	No	No	7	Not indicated	negative
5424	16	Male	alive, living in this HH	dead	form 4	Excellent	No	No	No	7	Not indicated	negative
5425	9	Female	alive, living in this HH	alive, living in this HH	grade 3	Excellent	No	No	No	7	Not indicated	negative
5426	12	Female	alive, another HH	alive, another HH	grade 5	Good	No	No	No	7	Not indicated	negative
5427	8	Male	alive, another HH	alive, another HH	grade 2	Excellent	No	No	No	7	Not indicated	negative
5428	8	Male	alive, another HH	alive, another HH	grade 2	Good	No	No	No	7	Not indicated	negative
5429	8	Female	alive, another HH	alive, another HH	grade 2	Good	No	No	No	7	Not indicated	negative
5430	13	Female	alive, living in this HH	alive, living in this HH	grade 7	Excellent	No	No	No	7	Negative	negative
5431	9	Female	alive, living in this HH	alive, living in this HH	grade 3	Excellent	No	No	No	7	Negative	negative
5432	17	Male	alive, living in this HH	alive, another HH	form 4	Excellent	No	No	No	7	Not indicated	negative
5433	15	Male	dead	dead	grade 7	Good	No	No	No	7	Positive	positive
5434	11	Female	dead	dead	grade 4	Good	No	No	No	7	Positive	positive
5435	9	Female	alive, another HH	alive, another HH	grade 3	Excellent	No	No	No	7	Not indicated	negative
5436	10	Female	alive, living in this HH	alive, living in this HH	grade 3	Good	No	No	No	7	Not indicated	negative
5437	12	Female	alive, living in this HH	alive, living in this HH	grade 6	Excellent	No	No	No	7	Not indicated	negative
5438	13	Male	alive, living in this HH	alive, other area	grade 7	Excellent	No	No	No	7	Not indicated	negative
5442	12	Female	alive, living in this HH	alive, other area	grade 4	Excellent	No	No	No	7	Negative	positive
5443	16	Male	alive, living in this HH	alive, living in this HH	form 2	Excellent	No	No	Yes	7	Not indicated	negative
5444	9	Male	alive, living in this HH	alive, living in this HH	grade 2	Excellent	No	No	No	7	Not indicated	negative
5445	14	Female	alive, living in this HH	alive, living in this HH	grade 7	Excellent	Yes	Yes	Yes	7	Positive	positive
5446	17	Female	dead	dead	form 4	Good	No	No	No	7	Not indicated	negative
5447	13	Female	alive, living in this HH	alive, living in this HH	grade 7	Excellent	No	No	No	7	Not indicated	negative
5448	8	Female	alive, living in this HH	dead	grade 1	Excellent	No	No	No	7	Not indicated	negative
5449	17	Female	dead	dead	form 3	Good	No	No	Yes	7	Not indicated	negative
5450	9	Female	alive, living in this HH	alive, living in this HH	grade 3	Excellent	No	No	No	7	Not indicated	negative
5451	8	Male	alive, living in this HH	alive, living in this HH	grade 1	Good	No	No	No	7	Not indicated	negative
5452	14	Male	alive, living in this HH	dead	form 1	Excellent	No	No	No	7	Not indicated	negative
5455	11	Female	alive, another HH	alive, another HH	grade 5	Good	No	No	No	7	Not indicated	negative
5456	14	Male	alive, another HH	alive, other area	grade 7	Excellent	No	No	No	7	Not indicated	negative
5458	14	Male	alive, living in this HH	alive, living in this HH	form 3	Excellent	No	No	No	7	Not indicated	negative
5459	8	Male	alive, living in this HH	alive, living in this HH	grade 2	Good	No	No	No	7	Not indicated	negative
5460	10	Male	alive, living in this HH	alive, living in this HH	grade 6	Good	No	No	No	7	Not indicated	negative
5462	11	Female	alive, living in this HH	alive, living in this HH	grade 7	Good	No	Yes	No	7	Negative	negative
5464	14	Male	dead	alive, living in this HH	form 1	Good	No	No	No	7	Not indicated	negative
5465	10	Male	alive, other area	dead	grade 4	Good	No	No	No	7	Not indicated	negative
5466	9	Male	alive, living in this HH	alive, living in this HH	grade 4	Good	No	No	No	7	Not indicated	negative
5467	16	Female	alive, living in this HH	alive, living in this HH	form 4	Excellent	No	No	No	7	Not indicated	negative
5468	13	Female	alive, living in this HH	alive, living in this HH	grade 7	Excellent	No	No	No	7	Not indicated	negative
5469	9	Female	alive, living in this HH	dead	grade 4	Good	No	No	No	7	Not indicated	negative
5470	9	Male	alive, living in this HH	alive, living in this HH	grade 4	Good	No	No	No	7	Negative	negative
5471	16	Male	alive, living in this HH	dead	form 3	Excellent	No	No	No	7	Not indicated	negative
5473	12	Male	alive, living in this HH	alive, living in this HH	grade 7	Good	No	No	No	7	Not indicated	negative
5479	12	Male	alive, living in this HH	alive, living in this HH	grade 5	Good	No	No	No	7	Not indicated	negative
5480	14	Male	alive, living in this HH	alive, living in this HH	form 2	Good	No	No	No	7	Not indicated	negative
5481	8	Female	alive, living in this HH	alive, living in this HH	grade 3	Good	No	No	No	7	Not indicated	negative
5482	8	Female	alive, living in this HH	alive, living in this HH	grade 1	Good	No	No	No	7	Not indicated	negative
5483	12	Male	alive, living in this HH	alive, living in this HH	grade 3	Good	No	No	No	7	Not indicated	negative
5484	12	Female	alive, another HH	dead	grade 4	Good	No	No	No	7	Not indicated	negative
5485	10	Female	alive, living in this HH	alive, living in this HH	grade 5	Excellent	No	No	No	7	Not indicated	negative
5486	9	Female	alive, living in this HH	alive, other area	grade 2	Good	No	No	No	7	Not indicated	negative
5487	16	Female	alive, other area	dead	form 4	Good	No	No	No	7	Not indicated	negative
5488	15	Female	dead	alive, other area	form 2	Good	No	No	Yes	7	Not indicated	negative
5489	8	Female	alive, other area	dead	grade 1	Good	No	No	No	7	Not indicated	negative
5490	12	Male	alive, another HH	alive, other area	grade 4	Good	No	No	No	7	Not indicated	negative
5491	14	Male	alive, living in this HH	alive, living in this HH	form 1	Good	No	No	No	7	Not indicated	negative
5492	9	Male	alive, other area	dead	grade 4	Good	No	No	No	7	Not indicated	negative
5493	17	Female	alive, other area	alive, other area	form 4	Good	No	No	No	7	Not indicated	negative
5494	15	Female	dead	dead	grade 6	Good	No	No	No	7	Negative	negative
5495	16	Female	alive, other area	alive, other area	grade 7	Good	No	Yes	No	7	Negative	negative
5496	9	Male	alive, living in this HH	alive, living in this HH	grade 3	Good	No	No	No	7	Not indicated	negative
5499	17	Female	alive, living in this HH	dead	form 4	Good	No	No	No	7	Negative	negative
5500	14	Female	alive, living in this HH	alive, living in this HH	grade 7	Good	No	Yes	No	7	Negative	positive
5501	8	Male	alive, living in this HH	alive, living in this HH	grade 2	Good	No	No	No	7	Not indicated	negative
5502	10	Male	alive, another HH	alive, another HH	grade 4	Good	No	No	No	7	Not indicated	negative
5503	15	Female	alive, living in this HH	alive, living in this HH	form 3	Good	No	No	No	7	Not indicated	negative
5504	9	Male	alive, living in this HH	alive, living in this HH	grade 3	Good	No	No	No	7	Not indicated	negative
5505	17	Female	alive, living in this HH	alive, living in this HH	form 4	Good	No	No	No	7	Not indicated	negative
5506	8	Female	alive, another HH	alive, another HH	grade 2	Good	No	No	No	7	Negative	negative
5507	14	Male	alive, another HH	alive, another HH	grade 7	Good	No	No	No	7	Not indicated	negative
5508	11	Female	alive, living in this HH	alive, living in this HH	grade 5	Good	No	No	No	7	Not indicated	negative
5510	14	Male	alive, living in this HH	alive, living in this HH	form 1	Excellent	No	No	No	7	Negative	negative
5511	14	Male	alive, living in this HH	dead	form 1	Excellent	No	No	No	7	Negative	negative
5512	8	Male	alive, living in this HH	alive, another HH	grade 2	Good	No	No	No	7	Not indicated	negative
5513	11	Male	alive, living in this HH	alive, another HH	grade 6	Excellent	No	No	No	7	Not indicated	negative
5515	13	Male	alive, living in this HH	dead	grade 7	Excellent	No	No	No	7	Not indicated	negative
5545	10	Male	alive, living in this HH	alive, living in this HH	grade 4	Fair	No	No	No	7	Not indicated	negative
5546	12	Male	alive, another HH	alive, another HH	grade 6	Good	No	No	No	7	Not indicated	negative
5547	17	Male	dead	alive, living in this HH	form 3	Good	No	No	No	7	Not indicated	negative
5548	12	Male	alive, living in this HH	alive, living in this HH	grade 5	Good	No	No	No	7	Not indicated	negative
5550	9	Female	alive, living in this HH	alive, living in this HH	grade 3	Good	No	No	No	7	Not indicated	negative
5551	15	Female	alive, other country	dead	form 2	Excellent	No	No	No	7	Not indicated	negative
5552	11	Female	alive, living in this HH	alive, living in this HH	grade 5	Excellent	No	No	No	7	Not indicated	negative
5553	14	Female	alive, living in this HH	alive, living in this HH	grade 6	Good	No	Yes	No	7	Not indicated	negative
5554	10	Female	alive, living in this HH	alive, other country	grade 4	Good	No	No	No	7	Not indicated	negative
5556	16	Male	alive, living in this HH	alive, living in this HH	form 1	Good	No	No	No	7	Not indicated	negative
5557	8	Male	alive, living in this HH	alive, living in this HH	grade 1	Good	No	No	No	7	Not indicated	negative
5558	17	Female	alive, another HH	alive, another HH	form 3	Good	No	No	No	7	Not indicated	negative
5559	8	Male	alive, living in this HH	alive, living in this HH	grade 1	Good	No	No	No	7	Not indicated	negative
5560	17	Female	alive, living in this HH	alive, living in this HH	form 2	Good	No	No	No	7	Negative	negative
5562	11	Male	alive, living in this HH	alive, living in this HH	grade 4	Good	No	No	No	7	Not indicated	negative
5563	14	Male	alive, living in this HH	alive, living in this HH	grade 7	Excellent	No	No	No	7	Not indicated	negative
5564	13	Female	alive, living in this HH	alive, living in this HH	grade 3	Good	No	No	No	7	Not indicated	negative
5567	16	Female	alive, other area	dead	grade 7	Good	No	No	No	7	Not indicated	negative
5568	9	Male	alive, another HH	alive, another HH	grade 2	Good	No	No	No	7	Negative	negative
5569	9	Female	alive, living in this HH	alive, living in this HH	grade 2	Good	No	No	No	7	Not indicated	negative
5571	13	Female	alive, another HH	alive, another HH	grade 7	Good	No	Yes	No	7	Not indicated	negative
5572	14	Female	alive, living in this HH	alive, living in this HH	form 1	Good	No	No	No	7	Not indicated	negative
5577	17	Male	alive, living in this HH	alive, living in this HH	form 3	Good	No	No	No	7	Not indicated	negative
5578	9	Male	alive, living in this HH	alive, living in this HH	grade 3	Good	No	No	No	7	Not indicated	negative
5580	9	Female	alive, living in this HH	alive, living in this HH	grade 4	Good	No	No	No	7	Negative	negative
5581	12	Male	alive, other area	alive, other area	grade 7	Excellent	No	No	No	7	Not indicated	negative
5582	16	Female	alive, another HH	alive, other area	form 3	Excellent	No	Yes	No	7	Not indicated	negative
5583	14	Female	alive, living in this HH	alive, living in this HH	form 2	Good	No	No	No	7	Not indicated	negative
5584	8	Male	alive, other country	alive, living in this HH	grade 2	Good	Yes	No	No	7	Not indicated	negative
5585	9	Male	alive, another HH	alive, other country	grade 4	Good	No	Yes	No	7	Not indicated	negative
5586	9	Female	alive, living in this HH	alive, living in this HH	grade 4	Good	No	No	No	7	Not indicated	negative
5587	8	Female	dead	alive, another HH	grade 3	Good	No	No	No	7	Negative	negative
5588	13	Male	alive, other area	alive, living in this HH	form 1	Excellent	No	No	No	7	Negative	negative
5589	8	Male	alive, living in this HH	alive, living in this HH	grade 3	Good	No	No	No	7	Not indicated	negative
5590	15	Male	alive, living in this HH	alive, living in this HH	form 3	Excellent	No	No	No	7	Not indicated	negative
5591	8	Male	alive, other country	alive, other country	grade 3	Excellent	No	No	No	7	Not indicated	negative
5593	14	Female	alive, other area	dead	form 1	Excellent	No	No	No	7	Negative	negative
5594	10	Female	alive, other area	dead	grade 5	Excellent	No	No	No	7	Negative	negative
5595	15	Male	alive, living in this HH	alive, living in this HH	form 3	Excellent	No	No	No	7	Not indicated	negative
5596	12	Male	alive, living in this HH	alive, living in this HH	grade 6	Good	No	No	No	7	Not indicated	negative
5597	10	Female	alive, other country	alive, other country	grade 5	Excellent	No	No	No	7	Negative	negative
5598	12	Female	alive, other area	dead	grade 5	Good	No	No	No	7	Negative	negative
5599	8	Male	alive, other area	alive, other area	grade 3	Good	No	No	No	7	Not indicated	negative
5600	10	Male	alive, living in this HH	alive, living in this HH	grade 5	Good	No	No	No	7	Negative	negative
5605	9	Female	alive, living in this HH	alive, living in this HH	grade 4	Fair	No	No	No	7	Not indicated	negative
5606	13	Female	alive, other area	alive, other area	form 1	Good	No	No	No	7	Not indicated	negative
5607	13	Female	alive, another HH	alive, living in this HH	grade 7	Fair	No	No	No	7	Not indicated	negative
5608	8	Male	alive, living in this HH	alive, other country	grade 4	Good	No	No	No	7	Not indicated	negative
5609	12	Male	alive, living in this HH	alive, living in this HH	grade 5	Good	No	No	No	7	Not indicated	negative
5610	15	Female	alive, other area	dead	form 3	Good	No	No	No	7	Not indicated	negative
5611	9	Male	alive, another HH	alive, living in this HH	grade 2	Good	No	No	No	7	Not indicated	negative
5612	11	Male	dead	alive, living in this HH	grade 4	Good	No	No	No	7	Not indicated	negative
5613	11	Male	alive, living in this HH	alive, living in this HH	grade 4	Good	No	No	No	7	Not indicated	negative
5614	12	Female	alive, living in this HH	dead	grade 6	Fair	No	No	No	7	Not indicated	negative
5615	15	Male	alive, living in this HH	alive, living in this HH	form 2	Good	No	No	No	7	Not indicated	negative
5616	8	Female	alive, living in this HH	alive, living in this HH	grade 3	Good	No	No	No	7	Not indicated	negative
5617	8	Male	alive, living in this HH	alive, living in this HH	grade 3	Good	No	No	No	7	Not indicated	negative
5622	15	Male	alive, other area	dead	grade 7	Excellent	No	No	No	7	Not indicated	negative
5623	16	Male	alive, other country	dead	form 2	Good	No	No	No	7	Not indicated	negative
5624	8	Male	alive, other area	alive, other area	grade 3	Good	No	No	No	7	Not indicated	negative
5625	14	Female	alive, other area	dead	grade 6	Good	No	No	No	7	Not indicated	negative
5626	9	Female	alive, living in this HH	alive, other area	grade 3	Good	No	No	No	7	Not indicated	negative
5627	15	Female	alive, other country	alive, other country	grade 4	Fair	No	No	No	7	Not indicated	negative
5628	14	Male	alive, other area	alive, other country	form 1	Excellent	No	No	Yes	7	Not indicated	negative
5629	16	Female	alive, living in this HH	alive, living in this HH	form 2	Fair	No	No	Yes	7	Not indicated	negative
5631	15	Male	alive, living in this HH	dead	form 1	Fair	No	No	No	7	Not indicated	negative
5632	10	Male	alive, living in this HH	alive, living in this HH	grade 4	Good	No	No	No	7	Not indicated	negative
5633	10	Female	alive, living in this HH	alive, living in this HH	grade 3	Good	No	No	Yes	7	Not indicated	negative
5634	17	Male	alive, living in this HH	alive, living in this HH	form 4	Excellent	No	No	No	7	Not indicated	negative
5635	13	Female	alive, living in this HH	alive, living in this HH	grade 7	Good	No	No	No	7	Not indicated	negative
5636	17	Female	alive, living in this HH	alive, living in this HH	form 3	Excellent	No	No	No	7	Not indicated	negative
5637	14	Female	alive, living in this HH	alive, living in this HH	form 1	Excellent	No	No	No	7	Not indicated	negative
5638	9	Male	alive, living in this HH	alive, other area	grade 3	Good	No	No	No	7	Not indicated	negative
5639	15	Male	alive, living in this HH	alive, living in this HH	grade 7	Excellent	No	No	Yes	7	Not indicated	negative
5640	15	Male	alive, living in this HH	alive, another HH	form 2	Good	No	Yes	Yes	7	Not indicated	negative
5641	8	Male	alive, living in this HH	alive, living in this HH	0	Good	No	No	No	7	Not indicated	negative
5643	17	Female	alive, living in this HH	alive, living in this HH	form 4	Excellent	No	Yes	No	7	Not indicated	negative
5645	8	Male	alive, living in this HH	alive, other country	grade 2	Excellent	No	No	No	7	Not indicated	negative
5646	15	Male	alive, living in this HH	alive, living in this HH	form 1	Good	No	No	No	7	Not indicated	negative
5647	10	Male	alive, living in this HH	alive, living in this HH	grade 4	Good	No	No	No	7	Not indicated	negative
5648	12	Female	alive, living in this HH	alive, living in this HH	grade 6	Good	No	No	No	7	Not indicated	negative
5649	9	Male	alive, living in this HH	alive, living in this HH	grade 2	Excellent	No	No	No	7	Not indicated	negative
5650	13	Female	alive, other area	alive, another HH	grade 7	Good	No	Yes	No	7	Not indicated	negative
5651	14	Female	alive, other area	alive, living in this HH	form 2	Good	No	Yes	Yes	7	Negative	negative
5652	12	Female	alive, living in this HH	alive, another HH	grade 6	Good	No	No	No	7	Not indicated	negative
5653	15	Male	alive, another HH	alive, another HH	form 1	Good	No	No	No	7	Not indicated	negative
5654	15	Male	alive, living in this HH	alive, living in this HH	grade 6	Good	No	No	No	7	Negative	negative
5655	13	Female	alive, another HH	alive, another HH	grade 7	Good	No	No	Yes	7	Negative	negative
5656	13	Female	alive, other country	alive, other country	grade 7	Excellent	No	No	No	7	Not indicated	negative
5658	9	Male	alive, living in this HH	alive, living in this HH	grade 4	Good	No	No	No	7	Not indicated	negative
5660	12	Female	alive, living in this HH	alive, living in this HH	grade 6	Good	No	No	No	7	Not indicated	negative
5663	8	Female	alive, living in this HH	alive, living in this HH	grade 3	Good	No	No	No	7	Not indicated	negative
5815	15	Female	alive, living in this HH	alive, living in this HH	form 2	Good	No	No	No	0	Not indicated	negative
5816	13	Female	alive, living in this HH	dead	grade 5	Fair	No	No	Yes	0	Negative	negative
5817	10	Male	alive, living in this HH	alive, living in this HH	grade 5	Good	No	No	No	0	Not indicated	negative
5818	8	Male	alive, living in this HH	alive, living in this HH	grade 2	Good	No	No	No	0	Not indicated	negative
5819	9	Female	alive, living in this HH	alive, another HH	grade 3	Good	No	No	No	0	Not indicated	negative
5820	11	Male	dead	alive, living in this HH	grade 6	Excellent	No	No	No	0	Not indicated	negative
5821	13	Female	alive, other area	dead	form 1	Good	No	No	No	0	Not indicated	negative
5822	13	Female	dead	dead	form 1	Excellent	No	No	No	0	Not indicated	negative
5823	13	Female	alive, other country	alive, other country	grade 7	Excellent	No	No	No	0	Not indicated	negative
5824	10	Male	alive, other area	alive, other country	grade 3	Good	No	No	No	0	Not indicated	negative
5825	13	Male	alive, another HH	alive, living in this HH	form 1	Excellent	No	No	No	0	Negative	negative
5827	8	Male	alive, other area	alive, other country	grade 2	Fair	No	Yes	No	0	Not indicated	negative
5828	12	Female	alive, living in this HH	alive, living in this HH	grade 7	Good	No	No	No	0	Not indicated	negative
5832	8	Male	alive, living in this HH	alive, other country	grade 3	Good	No	No	No	0	Not indicated	negative
5833	12	Male	alive, living in this HH	alive, living in this HH	grade 6	Good	No	No	No	0	Not indicated	negative
5838	9	Male	alive, living in this HH	alive, other area	grade 4	Good	No	No	No	0	Negative	negative
5841	14	Female	alive, living in this HH	dead	form 1	Excellent	No	No	No	0	Not indicated	negative
5844	12	Female	alive, living in this HH	alive, living in this HH	grade 6	Excellent	No	No	No	0	Not indicated	negative
5845	16	Female	dead	dead	form 3	Excellent	No	No	No	0	Not indicated	negative
5846	14	Female	alive, living in this HH	alive, living in this HH	form 1	Excellent	No	No	No	0	Not indicated	negative
5847	14	Male	alive, living in this HH	alive, living in this HH	form 1	Good	No	No	Yes	0	Not indicated	negative
5848	13	Male	alive, living in this HH	alive, living in this HH	grade 6	Excellent	No	Yes	No	0	Not indicated	negative
5849	12	Female	alive, living in this HH	alive, living in this HH	grade 6	Excellent	No	No	No	0	Not indicated	negative
5850	8	Female	alive, living in this HH	alive, living in this HH	grade 3	Good	No	No	No	0	Not indicated	negative
5851	9	Female	alive, living in this HH	alive, living in this HH	grade 3	Good	No	No	No	0	Not indicated	negative
5852	17	Male	alive, living in this HH	alive, living in this HH	form 2	Excellent	No	No	No	0	Not indicated	negative
5853	17	Male	alive, living in this HH	alive, living in this HH	form 4	Fair	No	No	No	0	Not indicated	negative
5855	14	Male	alive, living in this HH	alive, living in this HH	grade 5	Excellent	No	No	Yes	0	Not indicated	negative
5856	11	Female	dead	alive, other country	grade 5	Excellent	No	No	No	0	Not indicated	negative
5857	11	Male	alive, other area	alive, other area	grade 4	Excellent	No	No	No	0	Not indicated	negative
5859	10	Male	alive, living in this HH	alive, living in this HH	grade 4	Good	No	No	No	0	Not indicated	negative
5860	14	Female	alive, living in this HH	alive, living in this HH	form 2	Good	No	No	No	0	Not indicated	negative
5861	13	Female	alive, living in this HH	alive, other area	grade 7	Excellent	No	No	No	0	Not indicated	negative
5862	10	Female	alive, other country	alive, other country	grade 3	Excellent	No	No	No	0	Not indicated	negative
5863	8	Male	alive, other country	alive, other country	grade 1	Excellent	No	No	No	0	Not indicated	negative
5864	9	Male	alive, living in this HH	alive, living in this HH	grade 2	Excellent	No	No	No	7	Not indicated	negative
5865	13	Male	alive, other country	alive, other country	grade 2	Excellent	No	No	No	0	Not indicated	negative
5868	16	Female	alive, other area	alive, other country	form 4	Good	No	No	No	0	Not indicated	negative
5869	8	Female	alive, living in this HH	alive, living in this HH	grade 2	Excellent	No	No	No	0	Not indicated	negative
5870	8	Female	alive, living in this HH	alive, another HH	grade 2	Excellent	No	No	No	0	Negative	negative
5871	11	Male	alive, living in this HH	alive, other area	grade 7	Excellent	No	No	No	0	Not indicated	negative
5872	16	Female	alive, other area	alive, other area	form 2	Good	No	No	No	0	Negative	positive
5873	13	Female	alive, living in this HH	alive, living in this HH	grade 7	Good	No	No	No	0	Negative	negative
5874	9	Female	alive, living in this HH	alive, living in this HH	grade 2	Excellent	No	No	No	0	Not indicated	negative
5875	8	Female	alive, living in this HH	alive, other country	grade 1	Good	No	No	No	0	Not indicated	negative
5876	8	Female	alive, living in this HH	alive, living in this HH	grade 1	Excellent	No	No	No	0	Not indicated	negative
5877	9	Male	alive, living in this HH	alive, living in this HH	grade 3	Excellent	No	No	No	0	Negative	negative
5878	11	Female	alive, another HH	alive, another HH	grade 4	Excellent	No	No	No	0	Not indicated	negative
5882	10	Female	alive, living in this HH	alive, living in this HH	grade 3	Good	No	No	No	0	Not indicated	negative
5883	9	Female	alive, living in this HH	alive, living in this HH	grade 3	Good	No	No	No	0	Not indicated	negative
5884	17	Female	alive, other area	alive, other area	form 4	Excellent	No	No	No	0	Negative	negative
5885	16	Male	alive, other country	alive, living in this HH	form 2	Excellent	No	No	No	0	Not indicated	negative
5887	8	Female	alive, living in this HH	alive, other country	grade 2	Good	No	No	No	0	Not indicated	negative
5888	15	Female	alive, living in this HH	alive, living in this HH	grade 7	Excellent	No	No	No	0	Not indicated	negative
5889	8	Male	alive, living in this HH	alive, another HH	grade 2	Good	No	No	No	0	Not indicated	negative
5890	8	Female	alive, living in this HH	alive, living in this HH	grade 3	Good	No	No	No	0	Not indicated	negative
5897	12	Female	alive, living in this HH	alive, other country	grade 6	Excellent	No	No	No	0	Not indicated	negative
5899	9	Male	alive, living in this HH	alive, other country	grade 2	Excellent	No	No	No	0	Not indicated	negative
5988	11	Male	alive, living in this HH	alive, another HH	grade 4	Good	No	Yes	No	0	Negative	negative
5989	8	Male	alive, living in this HH	alive, living in this HH	grade 1	Good	No	No	No	0	Not indicated	negative
5990	14	Male	alive, living in this HH	alive, living in this HH	form 1	Good	No	No	No	0	Negative	negative
5991	12	Male	alive, other country	alive, other country	grade 6	Good	No	No	No	0	Negative	negative
5992	14	Female	alive, living in this HH	alive, living in this HH	grade 6	Good	No	No	No	0	Not indicated	negative
5993	15	Female	alive, living in this HH	alive, living in this HH	form 1	Good	No	No	No	0	Not indicated	negative
5994	8	Female	alive, other country	alive, other country	grade 1	Good	No	No	No	0	Not indicated	negative
5995	8	Male	alive, living in this HH	alive, living in this HH	grade 1	Good	No	No	No	0	Not indicated	negative
5996	14	Male	alive, another HH	alive, another HH	form 1	Good	No	No	No	0	Negative	negative
5997	9	Male	alive, living in this HH	alive, another HH	grade 2	Good	No	No	No	0	Not indicated	negative
6003	13	Male	alive, living in this HH	alive, living in this HH	grade 7	Excellent	No	No	No	0	Negative	negative
6005	16	Female	alive, living in this HH	alive, living in this HH	form 3	Excellent	No	No	No	0	Not indicated	negative
6006	11	Male	alive, living in this HH	alive, living in this HH	grade 5	Good	No	No	No	0	Not indicated	negative
6007	8	Female	alive, living in this HH	alive, living in this HH	grade 2	Excellent	No	No	No	0	Not indicated	negative
6012	17	Female	alive, other area	alive, other area	form 3	Excellent	No	No	No	0	Not indicated	negative
6013	17	Male	dead	dead	form 4	Excellent	No	Yes	Yes	0	Not indicated	negative
6014	16	Female	alive, living in this HH	alive, living in this HH	form 2	Excellent	No	Yes	No	0	Not indicated	negative
6015	11	Female	alive, living in this HH	alive, living in this HH	grade 5	Excellent	No	No	No	0	Not indicated	negative
6016	16	Male	alive, living in this HH	alive, living in this HH	form 3	Excellent	No	No	No	0	Negative	negative
6017	10	Female	alive, living in this HH	alive, living in this HH	grade 4	Excellent	No	No	No	0	Not indicated	negative
6018	17	Female	alive, other area	dead	form 4	Good	No	No	No	0	Not indicated	negative
6019	14	Female	alive, other area	alive, other area	grade 7	Good	No	No	Yes	0	Not indicated	negative
6020	9	Female	alive, living in this HH	alive, living in this HH	grade 3	Excellent	No	No	No	0	Not indicated	negative
6021	14	Male	alive, other area	alive, other area	grade 7	Excellent	No	No	No	0	Not indicated	negative
6022	9	Female	alive, living in this HH	alive, living in this HH	grade 2	Excellent	No	No	No	0	Not indicated	negative
6023	17	Male	alive, living in this HH	alive, living in this HH	form 4	Good	No	No	Yes	0	Not indicated	negative
6024	15	Male	alive, living in this HH	alive, living in this HH	form 2	Good	No	No	No	0	Not indicated	negative
6025	15	Female	alive, living in this HH	alive, living in this HH	form 2	Good	No	No	No	0	Not indicated	negative
6026	13	Male	alive, living in this HH	alive, living in this HH	grade 7	Good	No	No	No	0	Not indicated	negative
6027	12	Male	alive, other country	alive, other country	grade 6	Good	No	No	Yes	0	Not indicated	negative
6028	17	Female	alive, living in this HH	alive, living in this HH	form 4	Good	No	No	No	0	Not indicated	negative
6029	15	Male	alive, living in this HH	alive, living in this HH	form 1	Excellent	No	No	No	0	Not indicated	negative
6030	11	Male	alive, living in this HH	alive, living in this HH	grade 6	Excellent	No	No	No	0	Not indicated	negative
6031	9	Male	alive, other area	alive, other area	grade 4	Good	No	No	No	0	Not indicated	negative
6032	16	Female	alive, other area	alive, other area	form 3	Excellent	No	No	No	0	Not indicated	negative
6033	17	Male	alive, living in this HH	alive, living in this HH	form 3	Excellent	No	No	No	0	Not indicated	negative
6035	17	Male	alive, living in this HH	alive, living in this HH	form 2	Excellent	No	No	No	0	Not indicated	negative
6036	16	Female	dead	dead	form 3	Excellent	No	No	No	0	Not indicated	negative
6037	12	Male	alive, living in this HH	dead	grade 6	Excellent	No	No	No	0	Not indicated	negative
6038	13	Male	alive, living in this HH	alive, living in this HH	grade 6	Excellent	No	No	Yes	0	Not indicated	negative
6042	15	Female	alive, living in this HH	alive, living in this HH	form 2	Excellent	No	No	No	0	Not indicated	negative
6043	13	Female	alive, living in this HH	alive, other country	grade 7	Excellent	No	No	No	0	Not indicated	negative
6044	14	Male	dead	dead	grade 7	Excellent	Yes	No	No	0	Negative	positive
6045	17	Female	alive, other area	alive, other area	form 4	Excellent	No	No	No	0	Not indicated	negative
6046	17	Female	alive, other area	alive, other area	form 4	Excellent	No	No	No	0	Not indicated	negative
6047	14	Female	alive, other area	alive, other area	form 1	Excellent	No	No	No	0	Not indicated	negative
6048	14	Male	alive, other area	alive, living in this HH	form 1	Excellent	No	No	No	0	Not indicated	negative
6049	14	Male	alive, living in this HH	alive, living in this HH	grade 7	Excellent	No	Yes	No	0	Not indicated	negative
6050	10	Male	alive, living in this HH	alive, living in this HH	grade 4	Good	No	Yes	No	0	Not indicated	negative
6051	17	Male	alive, living in this HH	alive, living in this HH		Good	No	No	No	0	Not indicated	negative
6052	8	Male	alive, living in this HH	alive, living in this HH	grade 2	Excellent	No	No	No	0	Not indicated	negative
6053	15	Male	alive, other area	alive, other area	grade 7	Excellent	No	No	No	0	Not indicated	negative
6058	15	Male	alive, living in this HH	alive, living in this HH	form 2	Excellent	No	No	No	0	Not indicated	negative
6060	11	Male	alive, living in this HH	alive, living in this HH	grade 4	Excellent	No	No	No	0	Not indicated	negative
6061	15	Female	alive, other area	alive, other area	form 2	Excellent	No	No	No	0	Not indicated	negative
6062	9	Female	alive, living in this HH	alive, living in this HH	grade 4	Excellent	No	No	No	0	Not indicated	negative
6064	11	Female	alive, living in this HH	alive, living in this HH	grade 5	Excellent	No	No	Yes	0	Negative	negative
6065	16	Male	alive, living in this HH	alive, living in this HH	form 2	Excellent	No	No	No	0	Not indicated	negative
6067	14	Female	alive, living in this HH	alive, living in this HH	grade 7	Excellent	No	No	No	0	Not indicated	negative
6073	13	Male	alive, living in this HH	alive, living in this HH	grade 7	Excellent	No	No	No	0	Not indicated	negative
6074	9	Female	alive, living in this HH	alive, living in this HH	grade 3	Excellent	No	No	No	0	Not indicated	negative
6077	13	Female	alive, living in this HH	alive, other area	form 1	Good	No	No	No	0	Not indicated	negative
6078	12	Female	alive, living in this HH	alive, other country	grade 7	Good	No	No	No	0	Not indicated	negative
6080	8	Female	alive, living in this HH	alive, other country	grade 2	Good	No	No	No	0	Not indicated	negative
6081	10	Female	alive, living in this HH	alive, other country	grade 4	Excellent	No	No	No	0	Not indicated	negative
6082	10	Male	alive, living in this HH	alive, living in this HH	grade 4	Good	No	No	No	0	Not indicated	negative
6083	12	Female	alive, living in this HH	alive, other country	grade 6	Excellent	No	No	No	0	Not indicated	negative
6084	8	Female	alive, living in this HH	alive, living in this HH	grade 3	Good	No	No	No	0	Not indicated	negative
6085	13	Female	alive, living in this HH	alive, living in this HH	form 1	Good	No	No	No	0	Not indicated	negative
6096	9	Male	alive, living in this HH	alive, living in this HH	grade 3	Good	No	No	No	0	Not indicated	negative
6097	8	Female	alive, living in this HH	alive, living in this HH	grade 1	Good	No	No	No	0	Not indicated	negative
6100	8	Male	alive, other country	alive, other country	grade 2	Good	No	No	No	0	Not indicated	negative
6101	9	Male	alive, other country	alive, other country	grade 3	Good	No	No	No	0	Not indicated	negative
6102	10	Male	alive, living in this HH	alive, living in this HH	grade 4	Excellent	No	No	No	0	Not indicated	negative
6105	11	Female	alive, living in this HH	alive, living in this HH	grade 4	Good	No	No	No	0	Negative	negative
6107	9	Male	alive, living in this HH	alive, living in this HH	grade 4	Excellent	No	No	No	0	Not indicated	negative
6108	16	Female	alive, living in this HH	alive, living in this HH	form 3	Excellent	No	No	No	0	Not indicated	negative
6109	8	Male	alive, other area	alive, living in this HH	grade 2	Excellent	No	No	No	0	Not indicated	negative
6110	16	Female	alive, living in this HH	alive, living in this HH	form 1	Excellent	No	No	No	0	Not indicated	negative
6111	11	Male	alive, living in this HH	alive, living in this HH	grade 5	Excellent	No	No	No	0	Not indicated	negative
6112	11	Female	alive, living in this HH	alive, other area	grade 5	Fair	No	No	No	0	Not indicated	negative
6113	8	Male	alive, another HH	alive, another HH	grade 1	Excellent	No	No	No	0	Not indicated	negative
6114	9	Female	alive, living in this HH	alive, living in this HH	grade 1	Good	No	No	No	0	Not indicated	negative
6115	15	Female	alive, living in this HH	alive, living in this HH	form 3	Good	No	No	No	0	Not indicated	negative
6116	16	Male	alive, living in this HH	alive, other country	form 3	Excellent	No	No	Yes	0	Not indicated	negative
6117	13	Male	alive, living in this HH	alive, living in this HH	grade 7	Excellent	No	No	No	0	Not indicated	negative
6118	10	Female	alive, living in this HH	alive, living in this HH	grade 4	Good	No	No	No	0	Not indicated	negative
6119	17	Male	alive, living in this HH	alive, living in this HH	form 4	Good	No	No	No	0	Negative	negative
6120	8	Male	alive, other country	alive, living in this HH	grade 1	Good	No	No	No	0	Not indicated	negative
6121	15	Female	alive, living in this HH	alive, living in this HH	grade 7	Excellent	No	No	No	0	Not indicated	negative
6122	10	Male	alive, living in this HH	alive, living in this HH	grade 4	Good	No	No	No	0	Not indicated	negative
6123	14	Female	alive, living in this HH	alive, living in this HH	form 1	Excellent	No	No	No	0	Not indicated	negative
6124	9	Female	alive, other area	alive, other area	grade 5	Good	No	No	Yes	0	Not indicated	negative
6125	12	Female	dead	alive, other country	grade 5	Good	No	No	No	0	Not indicated	negative
6126	11	Female	alive, living in this HH	alive, living in this HH	grade 5	Excellent	No	No	Yes	0	Not indicated	negative
6127	9	Male	alive, other area	alive, other area	grade 3	Excellent	No	No	No	0	Not indicated	negative
6128	17	Female	alive, living in this HH	dead	form 5	Good	No	No	No	0	Not indicated	negative
6129	17	Female	alive, living in this HH	alive, living in this HH	form 3	Excellent	No	No	No	0	Negative	negative
6130	10	Male	alive, living in this HH	alive, living in this HH	grade 3	Fair	No	No	Yes	0	Positive	positive
6131	15	Male	alive, other area	alive, other area	form 1	Excellent	No	No	No	0	Not indicated	negative
6134	14	Female	alive, living in this HH	alive, living in this HH	grade 7	Excellent	No	No	No	0	Not indicated	negative
6135	8	Male	alive, living in this HH	alive, living in this HH	grade 2	Excellent	No	No	No	0	Not indicated	negative
6136	16	Female	dead	alive, living in this HH	form 3	Excellent	No	No	Yes	0	Not indicated	negative
6137	13	Female	alive, other area	dead	form 1	Good	No	No	Yes	0	Not indicated	negative
6138	16	Female	alive, another HH	alive, living in this HH	form 2	Good	No	No	No	0	Not indicated	negative
[truncated: 3,449 more rows]

## Sheet: Algorithm
	Test (n=5384)
	HIV prevalence	p-cut-off	True +ve	False +ve	True -ve	False -ve	n	Sensitivity	Specificity	PPV	NPV	How many HIV test with algo	How many HIV test for 1 HIV+ (NNT)	no. screen-ve to catch one algo -ve (NNT -ve)	No.algo for 1 hIV+	% correctly classified by algorthm	Reduction in NNT+ compared to universal testing
admit	0.013	0.1	11	295	5018	60	5384	0.15493	0.944476	0.0359477	0.988184	306	27.8182	84.6333	75.831	0.934064	0.633155
skn	0.013	0.1	5	200	5113	66	5384	0.0704225	0.962356	0.0243902	0.987256	205	41	78.4697	75.831	0.950594	0.459324
orph	0.013	0.1	26	856	4457	45	5384	0.366197	0.838886	0.0294785	0.990004	882	33.9231	100.044	75.831	0.832652	0.552649
hlth	0.013	0.1	5	189	5124	66	5384	0.0704225	0.964427	0.0257732	0.987283	194	38.8	78.6364	75.831	0.952637	0.488336
Score>=1	0.013	0.1	40	1323	3990	31	5384	0.56338	0.750988	0.029347	0.99229	1363	34.075	129.71	75.831	0.748514	0.550645
Score>=2	0.013	0.1	5	191	5122	66	5384	0.0704225	0.96405	0.0255102	0.987278	196	39.2	78.6061	75.831	0.952266	0.483061
Score>=3	0.013	0.1	2	23	5290	69	5384	0.028169	0.995671	0.08	0.987124	25	12.5	77.6667	75.831	0.982912	0.83516
	Test (n=5448)
admit	0.024	0.1	37	294	5014	103	5448	0.264286	0.944612	0.111782	0.979871	331	8.94595	49.6796	38.9143	0.927129	0.770112
skn	0.024	0.1	23	200	5108	117	5448	0.164286	0.962321	0.103139	0.977608	223	9.69565	44.6581	38.9143	0.941814	0.750846
orph	0.024	0.1	64	855	4453	76	5448	0.457143	0.838922	0.0696409	0.983219	919	14.3594	59.5921	38.9143	0.829112	0.631
hlth	0.024	0.1	28	189	5119	112	5448	0.2	0.964393	0.129032	0.978589	217	7.75	46.7054	38.9143	0.94475	0.800844
Score>=1	0.024	0.1	100	1321	3987	40	5448	0.714286	0.75113	0.070373	0.990067	1421	14.21	100.675	38.9143	0.750184	0.634838
Score>=2	0.024	0.1	36	191	5117	104	5448	0.257143	0.964017	0.15859	0.98008	227	6.30556	50.2019	38.9143	0.945852	0.837963
Score>=3	0.024	0.1	16	23	5285	124	5448	0.114286	0.995667	0.410256	0.977075	39	2.4375	43.621	38.9143	0.973018	0.937362
